# Supplementary material for: Photoredox-catalyzed protecting-group-freeC-glycosylation with glycosyl sulfinateviathe Giese reaction
Source: Royal Society of Chemistry journal article supplement (doi:10.1039/d3cc02361c), 2023-01-01

## Supporting Information

# Photoredox-catalyzed Protecting-group-free C-Glycosylation with Glycosyl sulfinates via Giese Reaction

Taishi Miura<sup>a</sup>, Makoto Yoritate<sup>a\*</sup>, and Go Hirai<sup>a\*</sup>

<sup>a</sup>Graduate School of Pharmaceutical Sciences, Kyushu University, 3-1-1 Maidashi, Higashi-ku, Fukuoka 812-8582,  
Japan

E-mail: [gohirai@phar.kyushu-u.ac.jp](mailto:gohirai@phar.kyushu-u.ac.jp)

[m.yoritate@phar.kyushu-u.ac.jp](mailto:m.yoritate@phar.kyushu-u.ac.jp)

## **Table of Contents**

|                                                                                            |                |
|--------------------------------------------------------------------------------------------|----------------|
| <b>1. General Remarks</b>                                                                  | <b>S2</b>      |
| <b>2. Cyclic Voltammetry (CV) and Differential Pulse Voltammetry (DPV)</b>                 | <b>S3</b>      |
| <b>3. HPLC Analytical Data</b>                                                             | <b>S4-S5</b>   |
| <b>4. Investigations of Giese Addition Reaction</b>                                        | <b>S6-S7</b>   |
| <b>5. Experimental Procedures</b>                                                          | <b>S8-S14</b>  |
| <b>6. Computational Methods</b>                                                            | <b>S15-S55</b> |
| <b>7. References</b>                                                                       | <b>S56</b>     |
| <b>8. <math>^1\text{H}</math>, <math>^{13}\text{C}</math> NMR Spectra of New Compounds</b> | <b>S57-S67</b> |

## 1. General Remarks

**Experiments and Reagents;** Reactions were carried out under an argon atmosphere unless noted otherwise. If the reactions were set using a glove box, those reactions were carried out under N<sub>2</sub> atmosphere. The water used for the reactions was distilled grade and was degassed by argon bubbling for 1 minute prior to use. The water used for purifications was distilled grade. Anhydrous MeOH, EtOH, DMSO, and DMF were purchased from Kanto Chemical Co. Ltd. and used for reactions without purification. Reactions were monitored by thin-layer chromatography using Merck Silica Gel 60 F254 plates. Flash chromatography was performed using flash silica gel 60N (spherical neutral, particle size 40–50 μm) purchased from Kanto Chemical Co. Ltd. or CHROMATOREX PSQ 60B (spherical neutral, particle size 60 μm) purchased from Fuji Silysia Chemical Co. Ltd. Photoredox reactions were performed with blue Kessil LED lamps 40 W (A160WE Tuna Blue), PhotoRedOx Box (Hepato Chem, HCK1006-01-016), and corresponding vial holder (Hepato Chem, HCK1006-01-019).

**Instrumentation:** NMR spectra were recorded 500 MHz Bruker Avance III, operating at 500 MHz for <sup>1</sup>H NMR, and 126 MHz for <sup>13</sup>C NMR. Chemical shifts were reported in the scale relative to CHCl<sub>3</sub> (δ 7.26 ppm for <sup>1</sup>H NMR, 77.16 ppm for <sup>13</sup>C NMR) or D<sub>2</sub>O (δ 4.79 ppm for <sup>1</sup>H NMR) or CD<sub>3</sub>OD (δ 3.31 ppm for <sup>1</sup>H NMR, 49.00 ppm for <sup>13</sup>C NMR) as an internal reference. Splitting patterns are designated as s: singlet, d: doublet, t: triplet, q: quartet, br: broadening and m: multiplet. High-resolution mass spectrometry (HRMS) was obtained with Bruker MicrOTOF II. HPLC analysis was performed on JASCO HPLC system consisting of the followings: pump, PU-4180; detector, Biotage<sup>®</sup> ELSD-A120; column, TSKgel Amide-80 5μm or GL Sciences InertSustain Amide 5 μm; mobile phase, acetonitrile/10 mM HCOONH<sub>4</sub> aqueous solution, MeCN/H<sub>2</sub>O or 0.1% TFA in MeCN/H<sub>2</sub>O. Cyclic voltammetry and differential pulse voltammetry were measured by BAS ALS model 660C.

## 2. Cyclic Voltammetry (CV) and Differential Pulse Voltammetry (DPV)

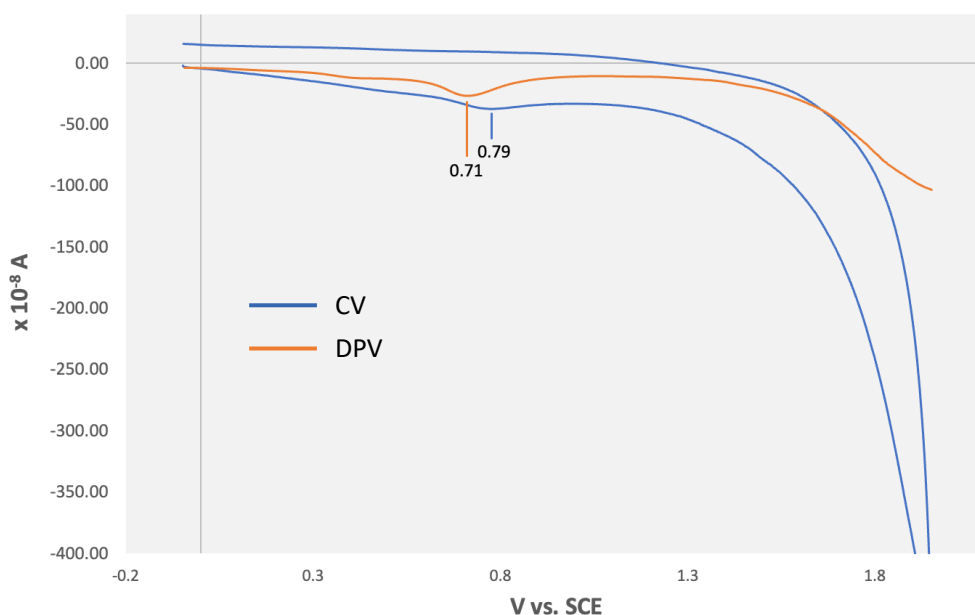

**Figure S1.** Cyclic voltammetry and differential pulse voltammetry of **4** vs. SCE in MeCN at  $0.100 \text{ Vs}^{-1}$ . *Conditions:* **4** (1 mM) and tetrabutylammonium hexafluorophosphate (0.1 M). A platinum working electrode, saturated Ag/AgNO<sub>3</sub> in MeCN reference electrode, and platinum mesh counter electrode were used. The X-axis was corrected from V vs. Ag/Ag<sup>+</sup> to V vs. SCE by subtracting 0.048 V. The peak top of DPV spectrum can be approximated to half-peak potential ( $E_{p/2}$ ) of the corresponding peak current of the CV spectrum.

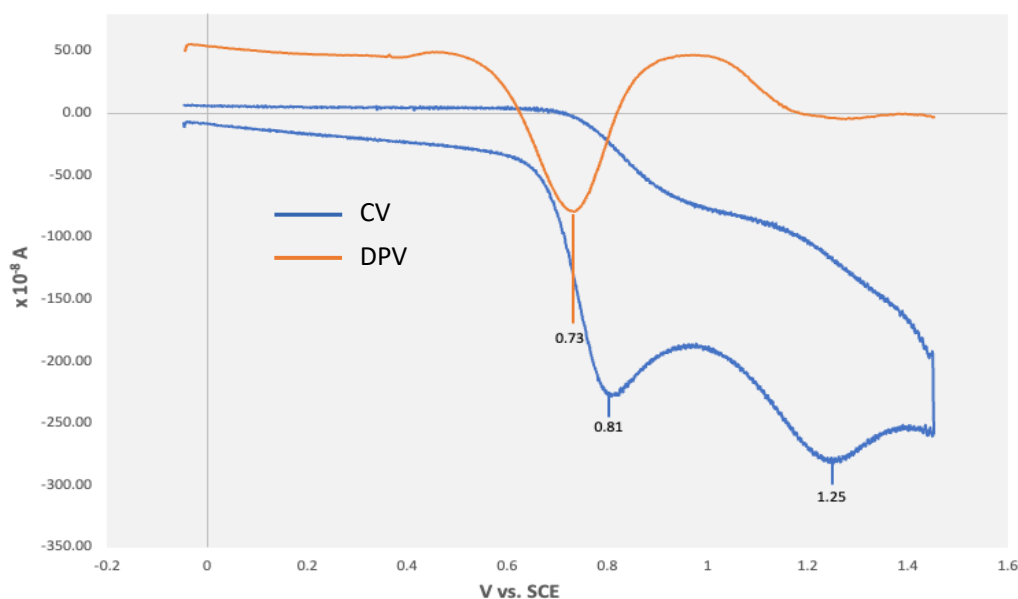

**Figure S2.** Cyclic voltammetry and differential pulse voltammetry of **4** vs. SCE in MeOH/H<sub>2</sub>O 4:1 at  $0.100 \text{ Vs}^{-1}$ . *Conditions:* **4** (1 mM) and tetraethylammonium hexafluorophosphate (0.1 M). A glassy carbon working electrode, Ag/AgCl in aqueous saturated KCl reference electrode, and platinum mesh counter electrode were used. The X-axis was corrected from V vs. Ag/Ag<sup>+</sup> to V vs. SCE by subtracting 0.048 V. The peak top of DPV spectrum can be approximated to half-peak potential ( $E_{p/2}$ ) of the corresponding peak current of the CV spectrum.

### 3. HPLC Analytical Data

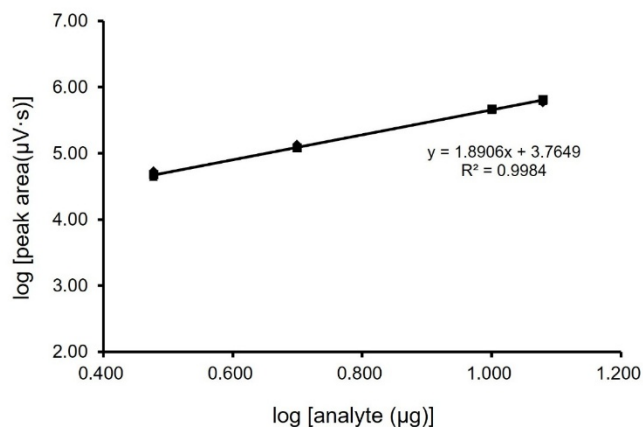

$$I = km^b$$

$$\log I = b \log m + \log k$$

where  $I$ : peak area ( $\mu V \cdot s$ ),  $m$ : weight of analyte,  $b$  and  $k$ : constant

**Figure S3. Calibration curve of 5a for HPLC analysis<sup>1</sup>**

*Condition:* TSKgel Amide-80 5  $\mu m$  ( $\phi$  4.6 mm  $\times$  250 mm), Flow rate: 1.0 mL/min (MeCN/10 mM HCOONH<sub>4</sub> aq = 90:10 to 80:20, gradient: 3–10 min.), **5a** was detected by ELSD.

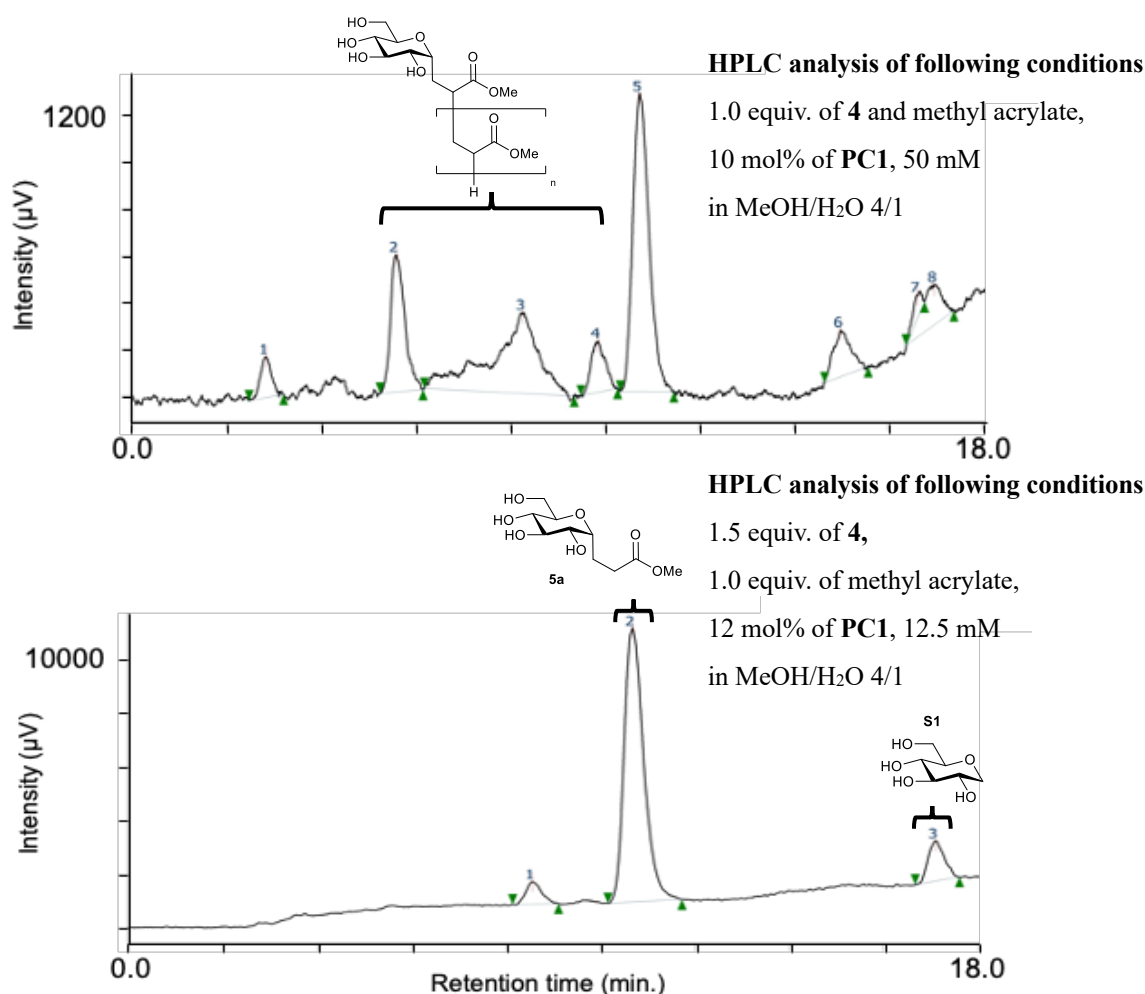

**Figure S4. Representative HPLC charts (samples: crude mixture of the coupling reaction)**

*Condition:* TSKgel Amide-80 5  $\mu\text{m}$  ( $\phi$  4.6 mm  $\times$  250 mm), Flow rate: 1.0 mL/min (MeCN/10 mM HCOONH<sub>4</sub> aq = 90:10 to 80:20, gradient: 3–10 min.), detection: ELSD. **5a**:  $t_R$  = 10.7 min, **S1** (reduced byproduct):  $t_R$  = 17.1 min, oligo-acrylate byproduct: around 5–9 min

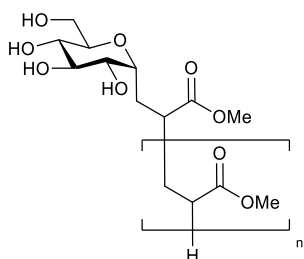

#### Oligo acrylate adduct

$n = 1-5$  was detected by ESI-MS. **HRMS-ESI (m/z):**

$n = 1$ : calcd for C<sub>14</sub>H<sub>24</sub>NaO<sub>9</sub> 359.1318, found 359.1308;  $n = 2$ : calcd for C<sub>18</sub>H<sub>30</sub>NaO<sub>11</sub> 445.1686, found 445.1665;

$n = 3$ : calcd for C<sub>22</sub>H<sub>36</sub>NaO<sub>13</sub> 531.2054, found 531.2045;  $n = 4$ : calcd for C<sub>26</sub>H<sub>42</sub>NaO<sub>15</sub> 617.2421, found 617.2410;

$n = 5$ : calcd for C<sub>32</sub>H<sub>48</sub>NaO<sub>17</sub> 703.2789, found 703.2769.

## 4. Investigations of Giese Addition Reaction

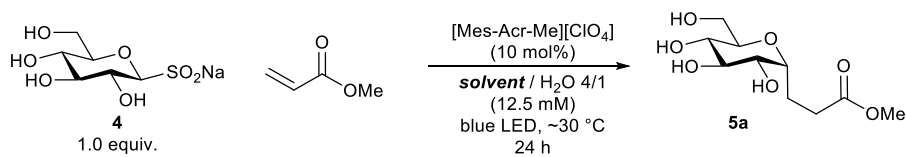

| entry | solvent | <b>5a</b> <sup>a</sup> |
|-------|---------|------------------------|
| 1     | MeOH    | 44%                    |
| 2     | DMSO    | 44%                    |
| 3     | DMF     | 41%                    |
| 4     | MeCN    | 27%                    |
| 5     | EtOH    | 19%                    |

<sup>a</sup> Yields were determined by HPLC.

**Table S1. Optimization of solvent**

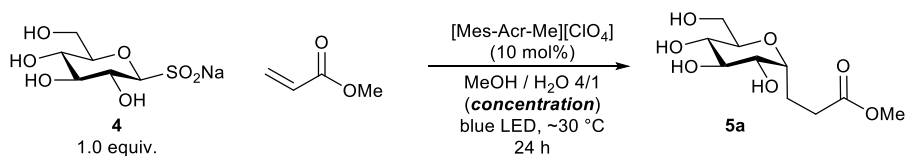

| entry | concentration | <b>5a</b> <sup>a</sup> |
|-------|---------------|------------------------|
| 1     | 50 mM         | 24%                    |
| 2     | 25 mM         | 26%                    |
| 3     | 12.5 mM       | 44%                    |

<sup>a</sup> Yields were determined by HPLC.

**Table S2. Optimization of concentration**

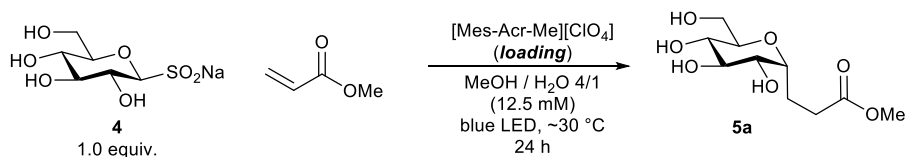

| entry | loading | <b>5a</b> <sup>a</sup> |
|-------|---------|------------------------|
| 1     | 5 mol%  | 44%                    |
| 2     | 8 mol%  | 43%                    |
| 3     | 10 mol% | 44%                    |
| 4     | 12 mol% | 56%                    |
| 5     | 15 mol% | 51%                    |

<sup>a</sup> Yields were determined by HPLC.

**Table S3. Optimization of photocatalyst loading**

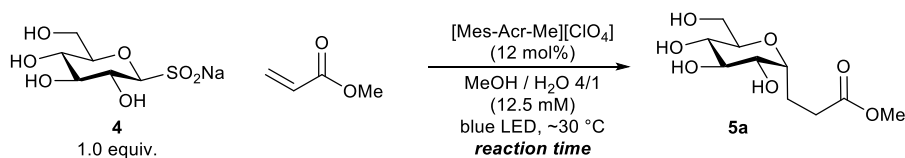

| entry | reaction time | <b>5a</b> <sup>a</sup> |
|-------|---------------|------------------------|
| 1     | 4 h           | 52%                    |
| 2     | 6 h           | 52%                    |
| 3     | 8 h           | 54%                    |
| 4     | 24 h          | 56%                    |

<sup>a</sup> Yields were determined by HPLC.

**Table S4. Screening of reaction time**

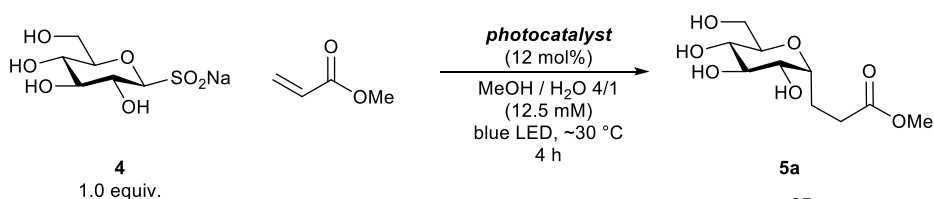

| entry          | photocatalyst | $E_{red}(^*A/A^{\cdot-})^c$ | <b>5a</b>        |
|----------------|---------------|-----------------------------|------------------|
| 1              | <b>PC1</b>    | +2.08 V                     | 52% <sup>a</sup> |
| 2              | <b>PC4</b>    | +1.21 V                     | 58% <sup>a</sup> |
| 3              | <b>PC2</b>    | +0.97 V                     | 57% <sup>a</sup> |
| 4              | <b>PC6</b>    | +1.18 V                     | 44% <sup>a</sup> |
| 5              | <b>PC3</b>    | +0.77 V                     | 0% <sup>a</sup>  |
| 6 <sup>d</sup> | <b>PC5</b>    | +1.35 V                     | 41% <sup>b</sup> |

<sup>a</sup> Yields were determined by HPLC. <sup>b</sup> Yield was determined by <sup>1</sup>H-NMR with sodium mesitylenesulfonate as an internal standard. <sup>c</sup> vs. SCE (in MeCN) <sup>d</sup> 10 mol%, MeOH (12.5 mM), 24 h. <sup>e</sup> Reported oxidation potentials of excited state photocatalysts (PC\*→PC<sup>•</sup>) in MeCN.

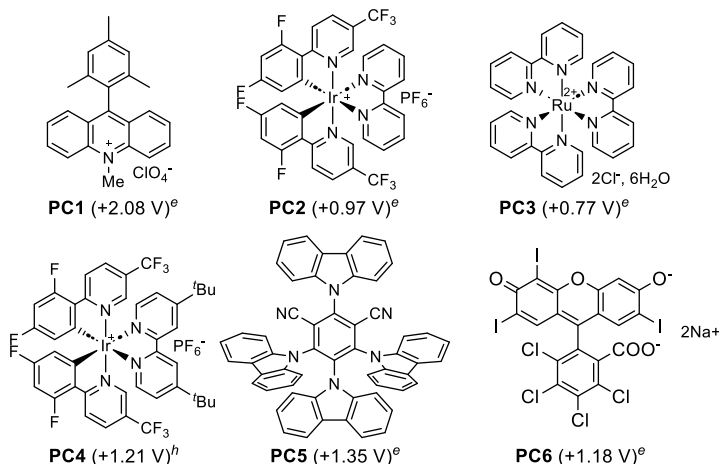

**Table S5. Investigation of photocatalyst**

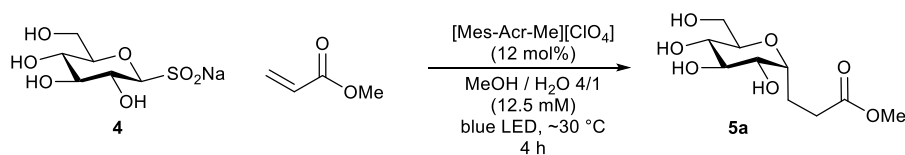

| entry | <b>4</b>   | methyl acrylate | <b>5a</b> <sup>a</sup> |
|-------|------------|-----------------|------------------------|
| 1     | 1.0 equiv. | 1.0 equiv.      | 52%                    |
| 2     | 1.0 equiv. | 1.2 equiv.      | 52%                    |
| 3     | 1.0 equiv. | 1.5 equiv.      | 61%                    |
| 4     | 1.2 equiv. | 1.0 equiv.      | 61%                    |
| 5     | 1.5 equiv. | 1.0 equiv.      | 79%                    |

<sup>a</sup> Yields were determined by HPLC.

**Table S6. Optimization of equivalents of 4 and methyl acrylate**



## 5. Experimental Procedures

### Synthesis of sulfinates donors

#### Compound 2

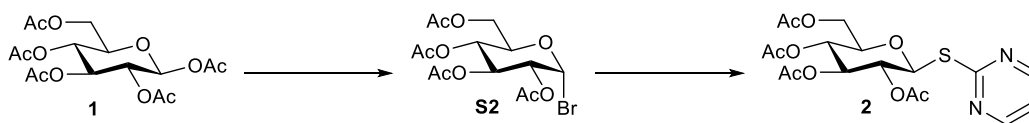

To a round bottom flask with **1** (1.17 g, 3.00 mmol, 1.0 equiv.) was added ca. 5.1 M HBr in AcOH (2.9 mL, 15 mmol, 5.0 equiv.) at room temperature. After stirring for 8 h at room temperature, the solution was poured into a mixture of EtOAc (20 mL), saturated aqueous NaHCO<sub>3</sub> (50 mL) and solid NaHCO<sub>3</sub> (ca 1 g). After separating layers, the aqueous layer was extracted with EtOAc (2 x 20 mL). The combined organic layers were dried over Na<sub>2</sub>SO<sub>4</sub> and concentrated under reduced pressure. The residue was dried by azeotrope with CH<sub>2</sub>Cl<sub>2</sub> (2 x 10 mL) to give a crude mixture of **S2** (1.22 g, 2.99 mmol, >99 %) which was used directly for the next reaction.

To a crude mixture of **S2** (1.22 g, 2.99 mmol, 1.0 equiv.) in CH<sub>2</sub>Cl<sub>2</sub> (10 mL) was added a mixture of 2-mercaptopyrimidine (1.01 g, 8.97 mmol, 1.5 equiv.), Na<sub>2</sub>CO<sub>3</sub> (1.11 g, 10.5 mmol, 3.5 equiv.) and tetrabutylammonium hydrogen sulfate (1.02 g, 2.99 mmol, 1.0 equiv.) in H<sub>2</sub>O (10 mL) by pipet. After stirring for 3 h at rt, the reaction mixture was extracted with CH<sub>2</sub>Cl<sub>2</sub> (3 x 20 mL). The combined organic layers were dried over Na<sub>2</sub>SO<sub>4</sub> and concentrated under reduced pressure. The residue was purified by silica gel column chromatography (Yamazen, ULTRAPACK Silica-40C, eluent: hexane/EtOAc = 55:45 to 40:60) to give **2** (1.17 g, 2.64 mmol, 88% from **1**) as a pale-yellow oil.

<sup>1</sup>H NMR spectrum of the synthesized compound **2** was consistent to a previous report.<sup>2</sup>

<sup>1</sup>H NMR (500 MHz, CDCl<sub>3</sub>): δ 8.54 (d, *J* = 4.9 Hz, 2H), 7.04 (t, *J* = 4.9 Hz, 1H), 5.79 (d, *J* = 10.3 Hz, 1H), 5.34 (dd, *J* = 9.3, 9.3 Hz, 1H), 5.25 (dd, *J* = 10.3, 9.3 Hz, 1H), 5.17 (dd, *J* = 10.3, 9.3 Hz, 1H), 4.26 (dd, *J* = 12.7, 4.9 Hz, 1H), 4.11 (dt, *J* = 12.7, 2.4 Hz, 1H), 3.89 (ddd, *J* = 10.3, 4.9, 2.4 Hz, 1H), 2.034 (s, 3H), 2.030 (s, 3H), 2.02 (s, 3H), 2.00 (s, 3H).

#### Compound 3

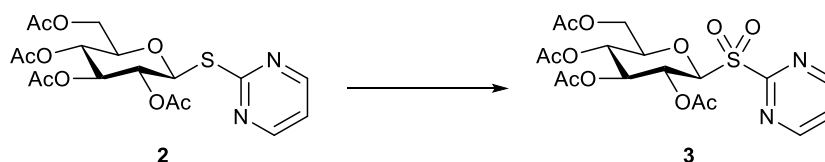

*m*CPBA (21.5 g, 70 wt%, 87.2 mmol, 5.0 equiv.) in a round bottom flask was dried under vacuum. To the flask was added a solution of **2** (7.72 g, 17.4 mmol, 1.0 equiv.) and NaHCO<sub>3</sub> (1.47 g, 17.4 mmol, 1.0 equiv.) in CH<sub>2</sub>Cl<sub>2</sub> (500 mL) at 0 °C. The temperature was warmed to 7 °C. After stirring for 48 h at 7 °C, the reaction mixture was treated with 1 M Na<sub>2</sub>SO<sub>3</sub> (300 mL) and saturated aqueous NaHCO<sub>3</sub> (250 mL) at room temperature. After separating layers, the aqueous layer was extracted with CH<sub>2</sub>Cl<sub>2</sub> (3 x 400 mL). The combined organic layers were dried over Na<sub>2</sub>SO<sub>4</sub> and concentrated. The residue was purified by silica gel column chromatography (Yamazen ULATRAPACK Silica-

40D, eluent: hexane/EtOAc = 15:85 to 0:100) to give **3** (6.88 g, 14.5 mmol, 83%) as a white solid.

$[\alpha]_D^{24}$  -30.89 (c = 1.0, CHCl<sub>3</sub>)

<sup>1</sup>H NMR (500 MHz, CDCl<sub>3</sub>): δ 8.98 (d, *J* = 4.9 Hz, 2H), 7.60 (t, *J* = 4.9 Hz, 1H), 5.82 (dd, *J* = 10.1, 9.2 Hz, 1H), 5.33 (dd, *J* = 9.5, 9.2 Hz, 1H), 5.24 (d, *J* = 10.1 Hz, 1H), 5.08 (dd, *J* = 10.1, 9.5 Hz, 1H), 4.01 (dd, *J* = 12.5, 4.9 Hz, 1H), 3.93 (dd, *J* = 12.5, 2.1 Hz, 1H), 3.75 (ddd, *J* = 10.1, 4.9, 2.1 Hz, 1H), 2.05 (s, 3H), 2.02 (s, 3H), 2.00 (s, 3H), 1.91 (s, 3H)

<sup>13</sup>C NMR (126 MHz, CDCl<sub>3</sub>): δ 170.30, 170.27, 169.27, 169.13, 164.30, 158.79 (2C), 124.13, 86.68, 76.63, 73.58, 67.52, 66.86, 61.43, 20.70, 20.69, 20.66, 20.62

HRMS-ESI (m/z): [M+Na]<sup>+</sup> calcd for C<sub>18</sub>H<sub>22</sub>N<sub>2</sub>NaO<sub>11</sub>S 497.0842, found 497.0836.

### Compound 4a

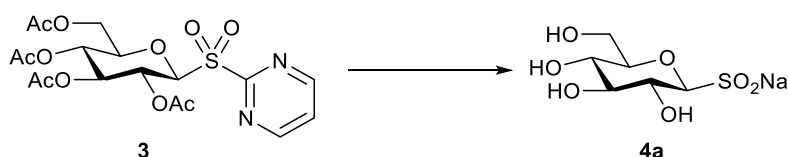

A round bottom flask with **3** (2.00 g, 4.22 mmol, 1.0 equiv.) was brought into N<sub>2</sub> filled glove box. NaOMe (1.37 g, 25.3 mmol, 6.0 equiv.) was added to the flask. After taking out of glove box, reagent grade MeOH (70 mL) was added, and the reaction mixture was heated in 50 °C oil bath. After stirring for 8 h, the solution was treated with silica gel (5.0 g) and concentrated. The residue was filtered through a pad of silica gel (eluent: CHCl<sub>3</sub>/MeOH 9:1 then CHCl<sub>3</sub>/MeOH/H<sub>2</sub>O 2:8:1). The filtration was concentrated. The resulting solid was dissolved in methanol (50 mL) at 60 °C and poured into ethanol (100 mL) through a glass filter, and hexane (30 mL) was added to the mixture to precipitate a white solid. The supernatant was removed by decantation, and the solid was dried under high vacuum to give **4a** (952 mg, 3.81 mmol, 90 %).

$[\alpha]_D^{25}$  -3.05 (c = 1.0, MeOH)

<sup>1</sup>H NMR (500 MHz, CDCl<sub>3</sub>): δ 3.94 (dd, *J* = 12.2, 2.1 Hz, 1H), 3.77 (dd, *J* = 12.2, 5.8 Hz, 1H), 3.69 (dd, *J* = 8.9, 8.9 Hz, 1H), 3.61 (d, *J* = 8.9 Hz, 1H), 3.58 (dd, *J* = 8.9, 8.9 Hz, 1H), 3.48 (ddd, *J* = 9.8, 5.8, 2.1 Hz, 1H), 3.41 (dd, *J* = 9.8, 8.9 Hz, 1H)

<sup>13</sup>C NMR (126 MHz, CDCl<sub>3</sub>): δ 92.70, 80.00, 77.12, 69.76, 69.16, 60.96

HRMS-ESI (m/z): [M+Na]<sup>+</sup> calcd for C<sub>6</sub>H<sub>11</sub>Na<sub>2</sub>O<sub>7</sub>S 273.0021, found 273.0022.

### General procedure for the Giese type reaction with the glucosyl sulfinate.

To a 4 mL or 13 mL glass vial was added sulfinate donors (75  $\mu\text{mol}$ , 1.5 equiv.), solution of photocatalyst and solution of acceptors (50  $\mu\text{mol}$ , 1.0 equiv.) in MeOH/H<sub>2</sub>O or MeOH/pH 7.0 phosphate buffer 4:1. The final concentration of acceptor was 12.5 or 50 mM. The mixture was stirred for 4 h or 16 h with irradiation of blue LED. The reaction temperature was maintained around 30 °C by cooling with a USB fan ( $\phi$ 11, 5W, the distance from reaction vial was ca. 15 cm). The reaction mixture was concentrated. The crude mixture was purified by silica gel column chromatography to give the product **5**.

### Compound 5a

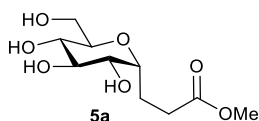

**General procedure** was followed for sulfinate **4a** (18.8 mg, 75.0  $\mu\text{mol}$ ), 9-mesityl-10-methylacridinium perchlorate (**PC1**, [Mes-Acr-Me][ClO<sub>4</sub>], 2.5 mg, 6.0  $\mu\text{mol}$ ) and methyl acrylate (4.5  $\mu\text{L}$ , 50  $\mu\text{mol}$ ) in MeOH/H<sub>2</sub>O (4:1, final concentration: 12.5 mM) for 4 h. The crude mixture was purified by silica gel column chromatography (Biotage Sfär HC Duo 10 g, eluent: CHCl<sub>3</sub>/MeOH 90:10 to 80:20) to give **5a** (9.3 mg, 37  $\mu\text{mol}$ , 74%) as a colorless oil.

$[\alpha]_{\text{D}}^{25}$  55.81 (c = 0.65, MeOH)

**<sup>1</sup>H-NMR (500 MHz, D<sub>2</sub>O):**  $\delta$  4.01 (ddd,  $J$  = 10.4, 6.1, 4.3 Hz, 1H), 3.81 (dd,  $J$  = 12.5, 2.4 Hz, 1H), 3.73 (dd,  $J$  = 9.8, 6.1 Hz, 1H), 3.71 (s, 3H), 3.70 (dd,  $J$  = 12.5, 5.5 Hz, 1H), 3.64 (dd,  $J$  = 9.8, 9.2 Hz, 1H), 3.50 (ddd,  $J$  = 9.8, 5.5, 2.4 Hz, 1H), 3.36 (dd,  $J$  = 9.8, 9.2 Hz, 1H), 2.53 (ddd,  $J$  = 16.5, 8.2, 6.4 Hz, 1H), 2.47 (ddd,  $J$  = 16.5, 8.9, 7.6 Hz, 1H), 2.07–1.92 (m, 2H)

**<sup>13</sup>C NMR (126 MHz, D<sub>2</sub>O):**  $\delta$  176.64, 75.19, 73.11, 72.50, 71.00, 70.13, 60.90, 52.21, 29.91, 19.41

**HRMS-ESI (m/z):** [M+Na]<sup>+</sup> calcd for C<sub>10</sub>H<sub>18</sub>NaO<sub>7</sub> 273.0950, found 273.0950.

### Compound 5b

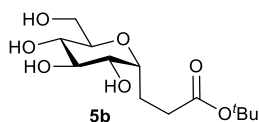

**General procedure** was followed for sulfinate **4a** (18.8 mg, 75.0  $\mu\text{mol}$ ), 9-mesityl-10-methylacridinium perchlorate (**PC1**, [Mes-Acr-Me][ClO<sub>4</sub>], 2.5 mg, 6.0  $\mu\text{mol}$ ) and *t*-butyl acrylate (7.3  $\mu\text{L}$ , 50  $\mu\text{mol}$ ) in MeOH/H<sub>2</sub>O (4:1, final concentration: 12.5 mM) for 4 h. The crude mixture was purified by silica gel column chromatography (Biotage Sfär HC Duo 10 g, eluent: CHCl<sub>3</sub>/MeOH 90:10 to 80:20) to give **5b** (8.8 mg, 30  $\mu\text{mol}$ , 60%) as a colorless oil.

$[\alpha]_{\text{D}}^{25}$  38.88 (c = 0.85, MeOH)

**<sup>1</sup>H-NMR (500 MHz, D<sub>2</sub>O):**  $\delta$  3.99 (ddd,  $J$  = 10.0, 5.9, 5.6 Hz, 1H), 3.83 (dd,  $J$  = 12.2, 2.2 Hz, 1H), 3.72 (dd,  $J$  = 9.8,

5.6 Hz, 1H), 3.70 (dd,  $J = 12.2, 5.4$  Hz, 1H), 3.64 (dd,  $J = 9.8, 9.1$  Hz, 1H), 3.51 (dd,  $J = 10.0, 5.4, 2.2$  Hz, 1H), 3.36 (dd,  $J = 10.0, 9.1$  Hz, 1H), 2.46 (ddd,  $J = 15.7, 7.6, 6.4$  Hz, 1H), 2.35 (ddd,  $J = 15.7, 8.3, 7.8$  Hz, 1H), 2.01–1.91 (m, 2H), 1.47 (s, 9H)

$^{13}\text{C}$  NMR (126 MHz,  $\text{D}_2\text{O}$ ):  $\delta$  175.46, 82.60, 75.04, 73.14, 72.51, 71.05, 70.18, 60.95, 31.26, 27.25 (3C), 19.54

HRMS-ESI ( $m/z$ ):  $[\text{M}+\text{Na}]^+$  calcd for  $\text{C}_{13}\text{H}_{24}\text{NaO}_7$  315.1420, found 315.1415.

### Compound 5c

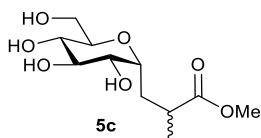

**General procedure** was followed for sulfinate **4a** (18.8 mg, 75.0  $\mu\text{mol}$ ), 9-mesityl-10-methylacridinium perchlorate (**PC1**, [Mes-Acr-Me][ClO<sub>4</sub>], 2.5 mg, 6.0  $\mu\text{mol}$ ) and methyl methacrylate (5.3  $\mu\text{L}$ , 50  $\mu\text{mol}$ ) in MeOH/H<sub>2</sub>O (4:1, final concentration: 50 mM) for 4 h. The crude mixture was purified by silica gel column chromatography (Biotage Sfär HC Duo 10 g, eluent: CHCl<sub>3</sub>/MeOH 90:10 to 80:20) to give **5c** (11.1 mg, 42  $\mu\text{mol}$ , 84%, dr 3:1) as a colorless oil.

$[\alpha]_{\text{D}}^{25}$  57.11 ( $c = 0.74$ , MeOH)

$^1\text{H}$ -NMR (500 MHz,  $\text{D}_2\text{O}$ , a 3:1 mixture of diastereomers):  $\delta$  4.11 (ddd,  $J = 11.9, 5.5, 2.4$  Hz, 0.25H), 4.02 (ddd,  $J = 10.7, 5.8, 5.2$  Hz, 0.75H), 3.83 (dd,  $J = 12.5, 1.8$  Hz, 0.75H), 3.76–3.68 (m, 5.25H), 3.66–3.60 (m, 1.0H), 3.55–3.48 (m, 1.0H), 3.43–3.34 (m, 1H), 2.77 (tdd,  $J = 7.3, 7.0, 6.1$  Hz, 0.75H), 2.65 (tdd,  $J = 7.0, 7.0, 6.7$  Hz, 0.25H), 2.14 (ddd,  $J = 15.0, 11.9, 6.7$  Hz, 0.25H), 2.00–1.88 (m, 1.5H), 1.72 (ddd,  $J = 15.0, 7.0, 2.4$  Hz, 0.25H), 1.24 (d,  $J = 7.3$  Hz, 2.25H), 1.21 (d,  $J = 7.0$  Hz, 0.75H)

$^{13}\text{C}$  NMR (126 MHz,  $\text{D}_2\text{O}$ , a 3:1 mixture of diastereomers):  $\delta$  180.19, 179.48, 74.29, 73.61, 73.07, 73.02, 72.73, 72.52, 70.91, 70.82, 70.15, 69.95, 60.92, 60.62, 52.34, 52.30, 36.54, 35.49, 27.88, 27.51, 16.94, 16.03

HRMS-ESI ( $m/z$ ):  $[\text{M}+\text{Na}]^+$  calcd for  $\text{C}_{11}\text{H}_{20}\text{NaO}_7$  287.1107, found 287.1107.

### Compound 5d

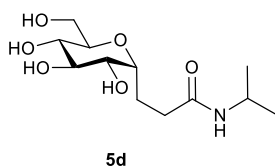

**General procedure** was followed for sulfinate **4a** (18.8 mg, 75.0  $\mu\text{mol}$ ), Ir[(dF(CF<sub>3</sub>)ppy)<sub>2</sub>bpy]PF<sub>6</sub> (**PC2**, 5.6 mg, 5.0  $\mu\text{mol}$ ) and *N*-<sup>i</sup>Pr-acrylamide (5.7 mg, 50  $\mu\text{mol}$ ) in MeOH/H<sub>2</sub>O (4:1, final concentration: 12.5 mM) for 16 h. The residue was purified by preparative HPLC (column: HILIC (amide); eluent: MeCN/H<sub>2</sub>O 85:15; flow rate: 9 mL/min; detection: ELSD) to give **5d** (8.0 mg, 29  $\mu\text{mol}$ , 57%) as a colorless oil.

$[\alpha]_D^{26}$  35.51 ( $c = 0.53$ , MeOH)

$^1\text{H NMR}$  (500 MHz,  $\text{D}_2\text{O}$ ):  $\delta$  3.96 (ddd,  $J = 11.6, 5.8, 3.7$  Hz, 1H), 3.91 (septet,  $J = 6.4$  Hz, 1H), 3.84 (dd,  $J = 12.2, 2.4$  Hz, 1H), 3.72 (dd,  $J = 10.1, 5.8$  Hz, 1H), 3.70 (dd,  $J = 12.2, 5.8$  Hz, 1H), 3.63 (dd,  $J = 10.1, 9.2$  Hz, 1H), 3.52 (ddd,  $J = 9.8, 5.8, 2.4$  Hz, 1H), 3.35 (dd,  $J = 9.8, 9.2$  Hz, 1H), 2.33 (ddd,  $J = 14.7, 8.9, 6.1$  Hz, 1H), 2.25 (ddd,  $J = 14.7, 7.9, 7.6$  Hz, 1H), 2.04–1.88 (m, 2H), 1.14 (d,  $J = 6.4$  Hz, 6H)

$^{13}\text{C NMR}$  (126 MHz,  $\text{D}_2\text{O}$ ):  $\delta$  174.66, 75.23, 73.12, 72.49, 71.01, 70.23, 61.03, 41.67, 31.96, 21.39, 21.28, 20.39

HRMS-ESI ( $m/z$ ):  $[\text{M}+\text{Na}]^+$  calcd for  $\text{C}_{12}\text{H}_{23}\text{NNaO}_6$  300.1423, found 300.1412.

#### Compound 5e

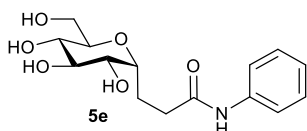

**General procedure** was followed for sulfinate **4a** (18.8 mg, 75.0  $\mu\text{mol}$ ),  $\text{Ir}[(\text{dF}(\text{CF}_3)\text{ppy})_2\text{bpy}]\text{PF}_6$  (**PC2**, 5.1 mg, 5.0  $\mu\text{mol}$ ) and *N*-phenylacrylamide (7.4 mg, 50  $\mu\text{mol}$ ) in MeOH/ $\text{H}_2\text{O}$  (4:1, final concentration: 12.5 mM) for 16 h. The crude mixture was purified by silica gel column chromatography (Biotage Sfär HC Duo 10g, eluent:  $\text{CHCl}_3/\text{MeOH}$  90:10 to 80:20) to give **5e** (12.1 mg, 39  $\mu\text{mol}$ , 78%) as a white solid.

$[\alpha]_D^{25}$  59.39 ( $c = 0.68$ , MeOH)

$^1\text{H NMR}$  (500 MHz,  $\text{CD}_3\text{OD}$ ):  $\delta$  7.56–7.53 (m, 2H), 7.32–7.27 (m, 2H), 7.10–7.05 (m, 1H), 3.94 (ddd,  $J = 10.4, 5.8, 5.2$  Hz, 1H), 3.80 (dd,  $J = 11.6, 2.4$  Hz, 1H), 3.63 (dd,  $J = 11.6, 5.8$  Hz, 1H), 3.61 (dd,  $J = 9.2, 5.8$  Hz, 1H), 3.55 (dd,  $J = 9.2, 8.2$  Hz, 1H), 3.46 (ddd,  $J = 9.2, 5.8, 2.4$  Hz, 1H), 3.25 (dd,  $J = 9.2, 8.2$  Hz, 1H), 2.52 (ddd,  $J = 14.3, 7.9, 6.4$  Hz, 1H), 2.42 (ddd,  $J = 14.3, 7.9, 7.6$  Hz, 1H), 2.14–1.99 (m, 2H)

$^{13}\text{C NMR}$  (126 MHz,  $\text{CD}_3\text{OD}$ ):  $\delta$  174.38, 139.92, 129.75 (2C), 125.10, 121.24 (2C), 76.69, 75.21, 74.60, 73.00, 72.32, 63.16, 34.15, 22.15

HRMS-ESI ( $m/z$ ):  $[\text{M}+\text{Na}]^+$  calcd for  $\text{C}_{15}\text{H}_{21}\text{NNaO}_6$  334.1267, found 334.1266.

#### Compound 5f

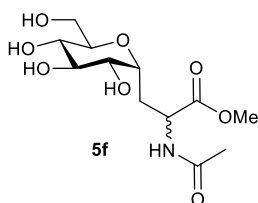

**General procedure** was followed for sulfinate **4a** (18.8 mg, 75.0  $\mu\text{mol}$ ), 9-mesityl-10-methylacridinium perchlorate (**PC1**,  $[\text{Mes-Acr-Me}][\text{ClO}_4]$ , 2.5 mg, 6.0  $\mu\text{mol}$ ) and methyl 2-acetamidoacrylate (7.2 mg, 50  $\mu\text{mol}$ ) in MeOH/pH 7.0 phosphate buffer (4:1, final concentration: 12.5 mM) for 16 h. The crude mixture was filtrated through a pad of silica gel with  $\text{CHCl}_3/\text{MeOH}$  4:1 and concentrated. The residue was purified by preparative HPLC (column: HILIC

(amide); eluent: MeCN/H<sub>2</sub>O 85:15; flow rate: 9 mL/min; detection: ELSD) to give **5f** (7.3 mg, 24 μmol, 47%, dr 2.0:1) as a colorless oil.

#### Major isomer

$[\alpha]_D^{25}$  44.23 (c = 0.45, MeOH)

**<sup>1</sup>H NMR (500 MHz, D<sub>2</sub>O):** δ 4.58 (dd, *J* = 6.7, 6.4 Hz, 1H), 4.15 (ddd, *J* = 10.1, 6.1, 4.0 Hz, 1H), 3.78 (s, 3H), 3.77–3.74 (m, 2H), 3.72 (dd, *J* = 9.8, 6.1 Hz, 1H), 3.59 (dd, *J* = 9.8, 9.2 Hz, 1H), 3.51 (ddd, *J* = 9.8, 4.3, 2.8 Hz, 1H), 3.40 (dd, *J* = 9.8, 9.2 Hz, 1H), 2.25–2.15 (m, 2H), 2.04 (s, 3H)

**<sup>13</sup>C NMR (126 MHz, D<sub>2</sub>O):** δ 173.99, 173.75, 73.02, 72.94 (2C), 70.59, 69.82, 60.62, 52.98, 50.52, 26.00, 21.62

**HRMS-ESI (m/z):** [M+Na]<sup>+</sup> calcd for C<sub>12</sub>H<sub>21</sub>NNaO<sub>8</sub> 330.1165, found 330.1162.

#### Minor isomer

$[\alpha]_D^{27}$  33.09 (c = 0.17, MeOH)

**<sup>1</sup>H NMR (500 MHz, D<sub>2</sub>O):** δ 4.54 (dd, *J* = 11.0, 4.0 Hz, 1H), 4.08 (ddd, *J* = 12.2, 6.1, 2.8 Hz, 1H), 3.84 (dd, *J* = 12.2, 2.1 Hz, 1H), 3.78 (s, 3H), 3.75 (dd, *J* = 9.8, 6.1 Hz, 1H), 3.72 (dd, *J* = 12.2, 5.5 Hz, 1H), 3.61 (dd, *J* = 9.8, 9.2 Hz, 1H), 3.57 (ddd, *J* = 10.1, 5.5, 2.1 Hz, 1H), 3.37 (dd, *J* = 10.1, 9.2 Hz, 1H), 2.34 (ddd, *J* = 15.6, 12.2, 4.0 Hz, 1H), 2.06 (s, 3H), 2.03 (ddd, *J* = 15.6, 11.0, 2.8 Hz, 1H)

**<sup>13</sup>C NMR (126 MHz, D<sub>2</sub>O):** δ 174.53, 174.28, 73.09, 72.91, 72.07, 70.47, 70.03, 60.90, 53.04, 49.32, 25.25, 21.61

**HRMS-ESI (m/z):** [M+Na]<sup>+</sup> calcd for C<sub>12</sub>H<sub>21</sub>NNaO<sub>8</sub> 330.1165, found 330.1156.

#### Compound 5g

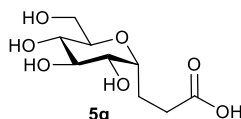

**General procedure** was followed for sulfinate **4a** (18.8 mg, 75.0 μmol), Ir[(dF(CF<sub>3</sub>)ppy)<sub>2</sub>dtbpy]PF<sub>6</sub> (**PC4**, 5.6 mg, 5.0 μmol) and acrylic acid (3.4 μL, 50 μmol) in MeOH/pH 7.0 phosphate buffer (4:1, final concentration: 12.5 mM) for 16 h. The crude mixture was filtrated through a pad of silica gel with 1% AcOH in CHCl<sub>3</sub>/MeOH/H<sub>2</sub>O 10:10:1 and concentrated. The residue was purified by preparative HPLC (column: HILIC (amide); eluent: 0.1% TFA in MeCN/H<sub>2</sub>O 85:15; flow rate: 9 mL/min; detection: ELSD) to give **5g** (4.8 mg, 20 μmol, 40%) as a colorless oil.

$[\alpha]_D^{26}$  38.81 (c = 0.43, MeOH)

**<sup>1</sup>H NMR (500 MHz, D<sub>2</sub>O):** δ 4.01 (dd, *J* = 11.0, 5.8, 4.0 Hz, 1H), 3.80 (dd, *J* = 12.2, 2.4 Hz, 1H), 3.72 (dd, *J* = 9.8, 5.8 Hz, 1H), 3.69 (dd, *J* = 12.2, 5.5 Hz, 1H), 3.63 (dd, *J* = 9.8, 8.9 Hz, 1H), 3.50 (ddd, *J* = 10.1, 5.5, 2.4 Hz, 1H), 3.35 (dd, *J* = 10.1, 8.9 Hz, 1H), 2.55–2.41 (m, 2H), 2.05–1.91 (m, 2H)

**<sup>13</sup>C NMR (126 MHz, D<sub>2</sub>O):** δ 178.06, 75.18, 73.12, 72.50, 71.01, 70.13, 60.87, 29.95, 19.43

**HRMS-ESI (m/z):** [M+Na]<sup>+</sup> calcd for C<sub>9</sub>H<sub>16</sub>NaO<sub>7</sub> 259.0794, found 259.0795.

### Compound 4b

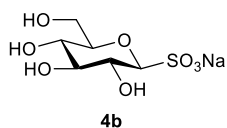

**General procedure** was followed for sulfinate **4a** (12.5 mg, 50.0  $\mu\text{mol}$ ),  $\text{Ru}(\text{bpy})_3\text{Cl}_2 \cdot 6\text{H}_2\text{O}$  (**PC3**, 3.7 mg, 5.00  $\mu\text{mol}$ ) and methyl acrylate (4.5  $\mu\text{L}$ , 50  $\mu\text{mol}$ ) in MeOH/H<sub>2</sub>O (4:1, without degassing, final concentration: 25 mM) for 6 h under air. The crude mixture was concentrated, triturated with CHCl<sub>3</sub> (1 mL) and EtOAc (1 mL) and filtrated. The residue was dissolved with H<sub>2</sub>O and concentrated to give **4b** (7.5 mg, 28  $\mu\text{mol}$ , 56%) as a white solid.

**<sup>1</sup>H NMR (500 MHz, CDCl<sub>3</sub>):**  $\delta$  4.22 (d,  $J = 9.5$  Hz, 1H), 3.92 (dd,  $J = 12.5, 2.1$  Hz, 1H), 3.74 (dd,  $J = 12.5, 5.8$  Hz, 1H), 3.68 (dd,  $J = 9.5, 9.2$  Hz, 1H), 3.57 (dd,  $J = 9.5, 9.2$  Hz, 1H), 3.53 (ddd,  $J = 9.8, 5.8, 2.1$  Hz, 1H), 3.45 (dd,  $J = 9.8, 9.5$  Hz, 1H)

**<sup>13</sup>C NMR (126 MHz, CDCl<sub>3</sub>):**  $\delta$  87.90, 80.06, 76.67, 70.86, 68.99, 60.82

**HRMS-ESI (m/z):** [M+Na]<sup>+</sup> calcd for C<sub>6</sub>H<sub>11</sub>Na<sub>2</sub>O<sub>8</sub>S 288.9970, found 288.9963.

## 6. Computational Methods

### 6-1. Conformational Distribution Analysis

Conformational distribution analysis of unprotected glucosyl radical **7** was conducted using Spartan 20 (MMFF, solvent=CPCM:water) with the following torsion setting: “chair flip” for C1, C2, C3, C4, C5, and O, and “single bond rotation” (3 x 120°) for C2-O, C3-O, C4-O, C5-C6, and C6-O (see Figure S5, resulting in a total 15552 candidates). Resulting 208 conformers were further optimized by Gaussian 16 (um062x/6-311G(d,p)//uB3LYP/6-31G(d,p), solvent=SMD:water). Then, the optimized structures were classified into 10-type of conformations:  ${}^4C_1$  (50),  ${}^1C_4$  (67),  ${}^1S_3$  (11),  ${}^1S_5$  (37),  ${}^0S_2$  (14),  $B_{2,5}$  (3),  $B_{0,3}$  (12),  $B_{1,4}$  (4),  ${}^2S_0$  (4),  ${}^5S_1$  (6). The Gibbs energy of the most stable structure of each conformation were  ${}^4C_1$  (0.0 kcal/mol),  ${}^1C_4$  (+0.6 kcal/mol),  ${}^0S_2$  (+1.7 kcal/mol),  ${}^1S_5$  (+2.8 kcal/mol),  ${}^1S_3$  (+2.9 kcal/mol),  $B_{2,5}$  (+3.9 kcal/mol),  $B_{0,3}$  (+3.9 kcal/mol),  $B_{1,4}$  (+5.0 kcal/mol),  ${}^2S_0$  (+5.6 kcal/mol), and  ${}^5S_1$  (+6.0 kcal/mol) (Figure S6). It should be noted that the  $B_{2,5}$  conformations tend to be converted into the  ${}^1S_5$  or  ${}^0S_2$  conformations during optimization. Therefore, the output files were carefully checked to confirm that the optimized conformations corresponded to the starting conformations. In this study, we classified the conformationally similar  $B_{2,5}$ ,  ${}^1S_5$ , and  ${}^0S_2$  by the dihedral angle between C5-C4-C1-O ( $\theta_{C5-C4-C1-O}$ , see Figure S7). Other boat and twist boat conformations are assigned by the similar way.

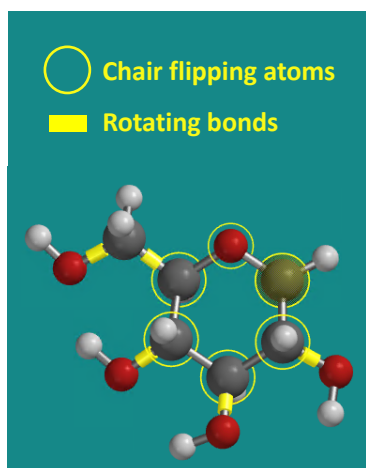

Figure S5. Torsion setting

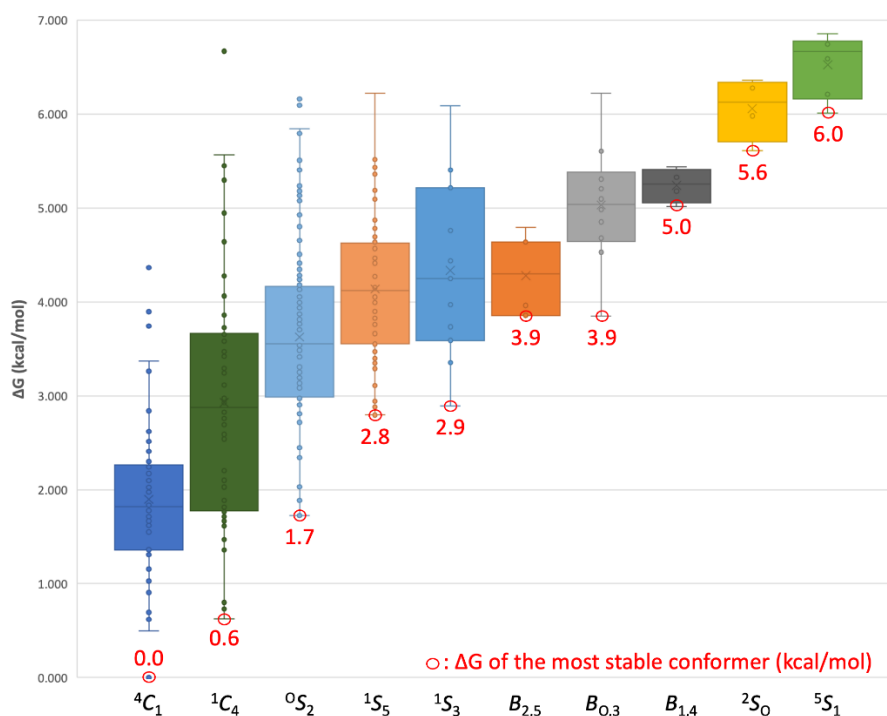

Figure S6. Boxplot of conformational distribution analysis

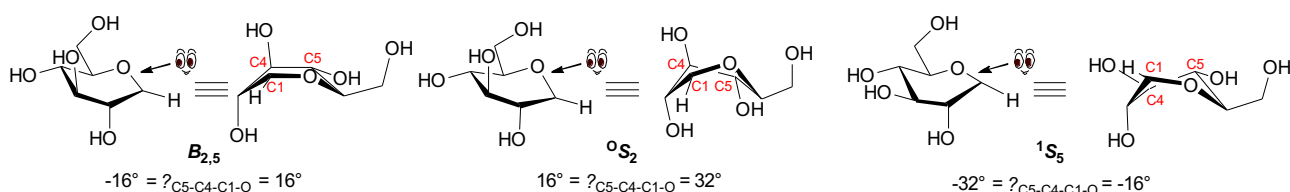

Figure S7. Definition of boat and twist boat conformations



## 6-2. Calculation of the Gibbs energy of C-glycosides 8a and 8b

Conformational distribution analysis and further optimization of the structures of **8a** and **8b** were performed on Spartan 20. Conformational distribution analysis (MMFF method) and subsequent optimization of their geometries (Hartree-Fock/3-21G) generated several structures with an energy threshold of  $\leq 40$  kJ/mol. Energy calculations were then performed ( $\omega$ B97X-D/6-31G(d)), extracting conformers with an energy threshold of  $\leq 15$  kJ/mol. Finally, geometry optimization using  $\omega$ B97X-D/6-31G(d) was performed to obtain the stable conformers with energy below 10 kJ/mol relative to the most stable conformer (Figure S6). The resulting conformers were further optimized with Gaussian 16 (um062x/6-311G(d,p)).

| Step                                          | Theory                             | Level  | Keep $\leq$ | At Most        |
|-----------------------------------------------|------------------------------------|--------|-------------|----------------|
| <input checked="" type="checkbox"/> Search:   | Molecular Mechanics                | MMFF   | 40 kJ/mol   | 500 Conformers |
| <input checked="" type="checkbox"/> Geometry: | Hartree-Fock                       | 3-21G  | 40 kJ/mol   | 200 Conformers |
| <input checked="" type="checkbox"/> Energy:   | Density Functional $\omega$ B97X-D | 6-31G* | 15 kJ/mol   | 100 Conformers |
| <input checked="" type="checkbox"/> Geometry: | Density Functional $\omega$ B97X-D | 6-31G* | 10 kJ/mol   | 50 Conformers  |

Figure S8. Exploration of the most stable conformer of **8a** and **8b**

## 6-3. Transition State Calculation

Transition state of the Giese reaction between glucosyl radical **7** and methyl acrylate to give **8a** and **8b** was explored using Reaction Plus (string method, B3LYP/6-31G(d,p)//B3LYP/3-21G\*). The initial structure was generated using the most stable structure of  ${}^4C_1$ ,  ${}^1C_4$ ,  ${}^1S_3$ ,  ${}^1S_5$ ,  ${}^0S_2$ , and  $B_{2,5}$  conformations. The Newman projection of the reaction point (between C1 of glucosyl radical and  $\beta$ -carbon of methyl acrylate) was set to be gauche. Therefore, three different initial structures for each conformer were investigated using B3LYP/3-21G\* level theory. The resulting IRC plots were analyzed, and the most favored path was further optimized with string method using B3LYP/6-31G(d,p) level theory.

Then the resulting starting material (SM), transition state (TS), and product (P) were further optimized by Gaussian 16 (m062x/6-311G(d,p)). Direct optimization at m062x/6-311G(d,p) level theory sometimes fails to converge. For such cases, the geometry was optimized first with B3LYP/6-311G(d,p) or m062x/6-31G(d,p) and then with m062x/6-311G(d,p). In most cases, the transition state optimization required the addition of “opt=noeigen” option to converge properly. If the RMD values were not converged, the following keyword was added: opt=maxstep=N ( $5 \leq N \leq 20$ ). The conformations of pyranose ring of output structures were carefully analyzed because the pyranose-ring frequently alter from that in the input structure.

### Input for the first QST2 calculation of protecting-group-free Giese reaction:

```
#p opt=(call,qst2) ub3lyp/3-21g* scrf=(smd,solvent=water) string=nbeads=15
```

### Input B for the second QST2 calculation of protecting-group-free Giese reaction:

```
#p opt=(call,qst2) ub3lyp/6-31g(d,p) scrf=(smd,solvent=water) string=nbeads=31
```

#### Input for the optimization/frequency of TS

#p opt=(calcfc,ts,noeigen) freq um062x/6-311g(d,p) scrf=(smd,solvent=water)

#### Input for the optimization/frequency of SM and P

#p opt=calcfc freq um062x/6-311g(d,p) scrf=(smd,solvent=water)

#### 6-4. Summary of the conformational distribution and TS calculation

Table S7 summarized the energy and sugar conformations at each transition states. The sum of the Gibbs energies of the separately calculated  ${}^4C_1$  glucosyl radical and methyl acrylate was found to be more stable than the initial structure of IRC plot where  ${}^4C_1$  glucosyl radical and methyl acrylate were interacting. Therefore, the relative energies were calculated based on sum of the Gibbs energies of  ${}^4C_1$  glucosyl radical and methyl acrylate.

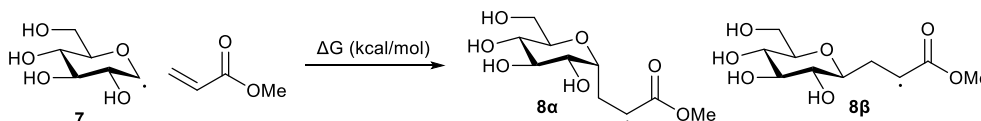

| initial conformation of glucosyl radical              | ${}^4C_1$ | ${}^1C_4$ | ${}^1S_3$ | ${}^1S_5$   | ${}^0S_2$ | $B_{2,5}$   |
|-------------------------------------------------------|-----------|-----------|-----------|-------------|-----------|-------------|
| conformation at TS toward $\alpha$ -isomer $8\alpha$  | ${}^4C_1$ | ${}^1C_4$ | ${}^4C_1$ | ${}^0S_2^b$ | ${}^0S_2$ | ${}^0S_2^b$ |
| activation energy toward $\alpha$ -isomer $8\alpha^a$ | +8.7      | +15.1     | (+8.7)    | (+12.3)     | +10.6     | +12.3       |
| conformation at TS toward $\beta$ -isomer $8\beta$    | ${}^4C_1$ | ${}^1C_4$ | $E_3$     | ${}^1S_5$   | ${}^1S_5$ | ${}^1S_5$   |
| activation energy toward $\alpha$ -isomer $8\beta^a$  | +14.4     | +11.1     | +12.8     | +11.8       | (+11.8)   | (+11.8)     |

<sup>a</sup>  $\Delta G$  (kcal/mol) based on sum of the Gibbs energies of the  ${}^4C_1$  glucosyl radical **7** and methyl acrylate.

<sup>b</sup> The pyranose ring was slightly distorted, forming intermediate structure between  ${}^0S_2$  and  $B_{2,5}$  conformations.

Table S7. Summary of transition state energies

#### 6-5. Conformational distribution analysis and transition state calculation of tetraacetylglucosyl radical.

The  ${}^4C_1$  and  $B_{2,5}$  conformations of tetraacetylglucosyl radical **S3** were drawn from the corresponding conformations of unprotected glucosyl radical **7**. Following conformational distribution analysis (Spartan 20 (MMFF), freezing the pyranose ring) generated the conformers within 40 kJ/mol, which were optimized using Gaussian (um062x/6-311G(d,p), solvent=SMD:dichloromethane). In addition, the Gibbs energy of the reported  $B_{2,5}$  and  ${}^4C_1$  conformations are also calculated as well. The most favored conformations were used for generating the initial structure for the transition state calculation. The transition states to give  $\alpha$ - and  $\beta$ -C-glycoside **S4 $\alpha$**  and **S4 $\beta$**  were investigated using Reaction Plus (uB3LYP/6-31G//uB3LYP/3-21G\*). The resulting **TS**, **SM**, **P** were further optimized using Gaussian 16 (um062x/6-311G(d,p), solvent=SMD:dichloromethane).

#### 6-6. Transition state calculation of the Giese radical addition with tetraacetylglucosyl radical S3

Figure S9 summarized the transition state calculation of the radical addition of tetraacetylglucosyl radical **S3** to methyl acrylate to give **S4**. As a result of conformational distribution analysis,  ${}^1S_5$  was found to be more stable than  $B_{2,5}$  conformation. Nakamura *et al.* also reported the  ${}^1S_5$  conformation was the most stable conformation, although they judged it as  $B_{2,5}$  conformation.<sup>3</sup> Giese *et al.* suggested that glucosyl radical occupied the  $B_{2,5}$  conformation judged by ESR spectrum, which could also be regarded as  ${}^1S_5$  conformation.<sup>4</sup>

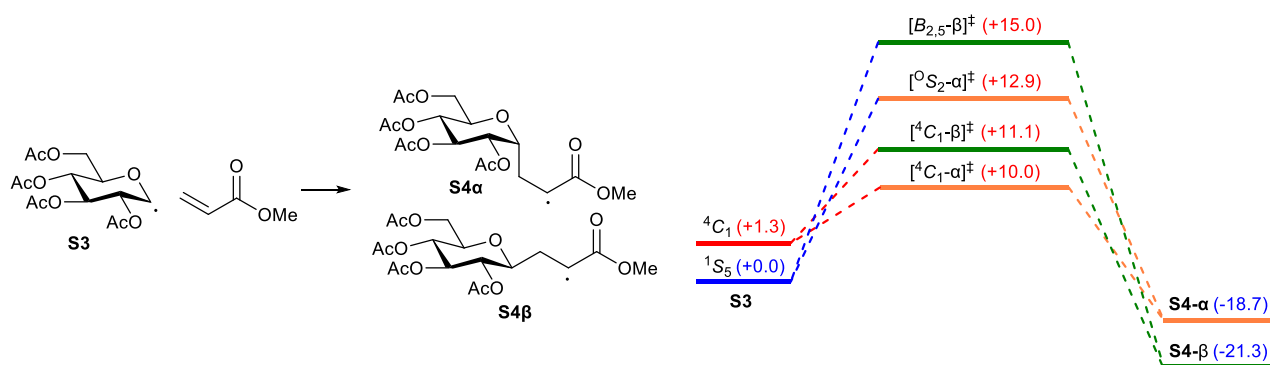

**Figure S9. Summary of TS calculation of the Giese reaction with tetraacetylglucosyl radical S3**

### 6-7. Discussion and summary of the computational study

The conformational analysis revealed that the most stable conformation for the protecting-group-free glucosyl radical **7** was " ${}^4C_1$  conformation". In contrast, the " $B_{2,5}$  conformation (or  ${}^1S_5$  conformation)", is the most stable conformation of tetraacetylglucosyl radical **S3**, which is attributable to both steric and stereo-electronic effects (Figure S8). The 2-OP and 3-OP groups of the protected glucosyl radical adopt a pseudo-axial position to reduce steric repulsion caused by gauche repulsion between 2-OP, 3-OP, and 4-OP, and steric repulsion between *H1* and 2-OP, resulting in the formation of the  $B_{2,5}$  conformation. These factors are negligible in the unprotected glucosyl radical, leading to the preferable existence of the  ${}^4C_1$  conformation.

In terms of stereoelectronic effect, glucosyl radical is stabilized by the orbital interaction between  $n_O$ ,  $SOMO_{C1}$ , and  $\sigma_{C2-O}^*$ , known as the "quasi-homo-anomeric effect". While the spin density at C1 position of unprotected **7**- $B_{2,5}$  (+0.885) is lower than that of **7**- ${}^4C_1$  (+0.928) by 0.043, the spin density difference between acetyl-protected glucosyl radical **S3**- $B_{2,5}$  (+0.879) and **S3**- ${}^4C_1$  (+0.932) is 0.053, indicating greater stabilization by conformational conversion from  ${}^4C_1$  to  $B_{2,5}$  due to better delocalization of the spin density. These computational results suggest that the protection of the hydroxy groups of the glucosyl radical plays a crucial role in the stereoelectronic stabilization effect.

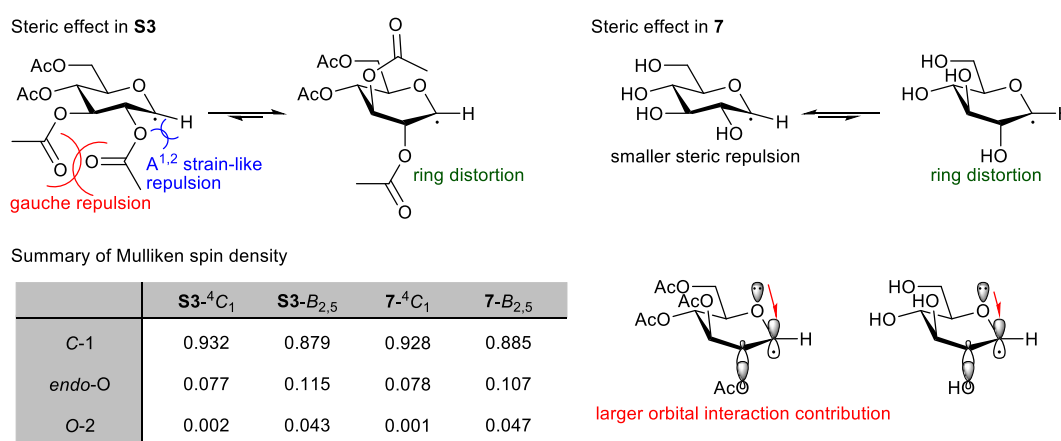

**Figure S10. The nature of conformational stability of protected and unprotected glucosyl radicals**

## 6-8. Structure of glucosyl radicals and transition states

### Glucosyl radical: ${}^4C_1$ conformation

G = -611.114682

Charge 0 Multiplicity 2

|   |             |             |             |
|---|-------------|-------------|-------------|
| O | 0.65129500  | -1.54210600 | -0.17534400 |
| C | -1.60230400 | -0.68394200 | 0.34171000  |
| C | 0.32551000  | 0.85502600  | 0.07105500  |
| C | -1.15959000 | 0.67808800  | -0.17301000 |
| C | 1.09519900  | -0.25506500 | -0.63424300 |
| C | -0.69911800 | -1.75833100 | -0.17896200 |
| H | -1.57301900 | -0.65305800 | 1.43963800  |
| H | 0.51825700  | 0.80139800  | 1.14986500  |
| H | -1.34888100 | 0.72514400  | -1.25477100 |
| H | 0.91437900  | -0.18189200 | -1.71311600 |
| H | -0.95314300 | -2.79752100 | -0.00707200 |
| O | -2.95673500 | -0.94869900 | 0.00834900  |
| H | -3.00375200 | -1.02743300 | -0.95345500 |
| O | -1.83189100 | 1.73411300  | 0.49164600  |
| H | -2.77426600 | 1.63958800  | 0.30955400  |
| O | 0.78781200  | 2.08443200  | -0.46047100 |
| H | 0.21593100  | 2.77623500  | -0.10678600 |
| C | 2.58527400  | -0.20816700 | -0.36675200 |
| H | 2.98587900  | 0.73731000  | -0.73112600 |
| H | 3.06554400  | -1.02675400 | -0.91218700 |
| O | 2.87519200  | -0.28496300 | 1.02007500  |
| H | 2.47785400  | -1.10089500 | 1.34663500  |

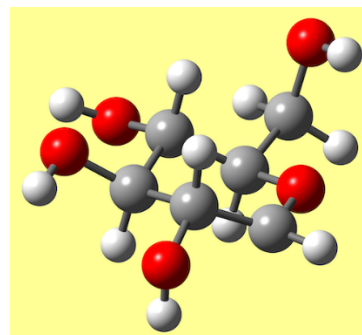

### Glucosyl radical: ${}^1C_4$ conformation

G = -611.113687

Charge 0 Multiplicity 2

|   |             |             |             |
|---|-------------|-------------|-------------|
| O | -0.28894200 | 0.54013000  | 1.50234900  |
| C | 1.23726100  | -1.00110200 | 0.33206400  |
| C | 0.14453800  | 0.88776200  | -0.90341900 |
| C | 0.69431300  | -0.54129800 | -1.02585800 |
| C | -0.81798400 | 1.07947600  | 0.27591900  |
| C | 0.28180000  | -0.70417000 | 1.43424000  |
| H | 1.43138100  | -2.07582600 | 0.30099000  |
| H | -0.39378000 | 1.13796100  | -1.82023700 |
| H | 1.52506400  | -0.51620400 | -1.73340100 |
| H | -0.88096000 | 2.15610000  | 0.44428800  |
| H | 0.41864400  | -1.14055300 | 2.41625400  |
| O | 2.48253200  | -0.28452700 | 0.51400200  |
| H | 2.77156800  | -0.41974900 | 1.42451400  |
| O | -0.25777700 | -1.44991700 | -1.53858800 |
| H | -1.05853800 | -1.39962000 | -0.98435300 |
| O | 1.22336500  | 1.80921500  | -0.78724600 |
| H | 1.85210500  | 1.42750900  | -0.15631300 |
| C | -2.24881600 | 0.58445600  | 0.09449900  |
| H | -2.64383000 | 0.97294900  | -0.84543800 |
| H | -2.85314800 | 0.97353300  | 0.91686100  |
| O | -2.37324000 | -0.83478900 | 0.04283900  |
| H | -2.20268400 | -1.18774700 | 0.92531700  |

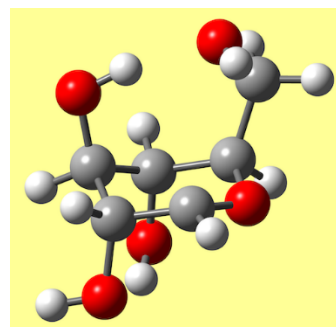

**Glucosyl radical:  $^{\circ}S_2$  conformation**

G = -611.111932

Charge 0 Multiplicity 2

|   |             |             |             |
|---|-------------|-------------|-------------|
| O | 0.49282000  | -1.09171500 | -0.89057700 |
| C | -1.78147700 | -0.54342100 | -0.18172100 |
| C | 0.13689900  | 0.86940800  | 0.58330100  |
| C | -1.03828400 | -0.00412200 | 1.04489600  |
| C | 0.79998900  | 0.30092900  | -0.69199400 |
| C | -0.83837600 | -1.39222700 | -0.96128500 |
| H | -2.64530400 | -1.14049100 | 0.11931700  |
| H | 0.86445600  | 0.89251600  | 1.39619900  |
| H | -1.70863600 | 0.61291100  | 1.64505200  |
| H | 0.42335900  | 0.85994000  | -1.55464600 |
| H | -1.01728700 | -2.44053000 | -1.15514600 |
| O | -2.21636900 | 0.62586500  | -0.90158300 |
| H | -2.37715500 | 0.36449600  | -1.81613900 |
| O | -0.60348800 | -1.06891500 | 1.87434500  |
| H | 0.09380400  | -1.55120800 | 1.41174900  |
| O | -0.25320600 | 2.21297500  | 0.35138000  |
| H | -0.97337400 | 2.16867700  | -0.29365200 |
| C | 2.30983100  | 0.38101600  | -0.63641100 |
| H | 2.60204300  | 1.41967400  | -0.47402400 |
| H | 2.73115000  | 0.03906300  | -1.58667300 |
| O | 2.82352300  | -0.37894400 | 0.44734300  |
| H | 2.52921000  | -1.28867800 | 0.31998000  |

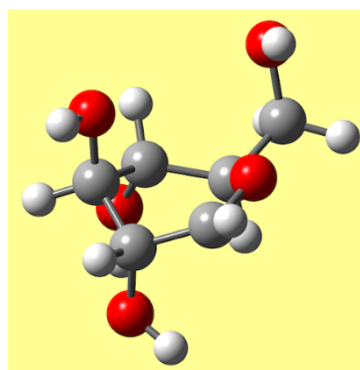

### Glucosyl radical: $^1S_5$ conformation

G = -611.110227

Charge 0 Multiplicity 2

|   |             |             |             |
|---|-------------|-------------|-------------|
| O | -0.46600800 | -1.49714900 | -0.41840500 |
| C | 1.79551400  | -0.58933300 | -0.16029900 |
| C | -0.25345200 | 0.86475600  | -0.01311000 |
| C | 1.26173300  | 0.83706900  | 0.08059600  |
| C | -0.84202600 | -0.45225500 | 0.49643200  |
| C | 0.81302400  | -1.42234500 | -0.89707400 |
| H | 2.71726900  | -0.52371700 | -0.74452400 |
| H | -0.51760500 | 0.95770700  | -1.07274900 |
| H | 1.55850500  | 1.13936200  | 1.09104500  |
| H | -0.44730000 | -0.68498900 | 1.49134700  |
| H | 1.08930600  | -2.27577000 | -1.50068700 |
| O | 2.08032800  | -1.13528200 | 1.14566200  |
| H | 2.31174100  | -2.06367400 | 1.02239500  |
| O | 1.74872800  | 1.75433300  | -0.88450700 |
| H | 2.69434300  | 1.86722300  | -0.73717500 |
| O | -0.73646600 | 1.97147100  | 0.72615600  |
| H | -1.61833000 | 2.18381400  | 0.39985200  |
| C | -2.35401300 | -0.44636200 | 0.54256400  |
| H | -2.68924700 | 0.26075800  | 1.30144800  |
| H | -2.70245600 | -1.44563500 | 0.82228900  |
| O | -2.91950300 | -0.03530400 | -0.69330000 |
| H | -2.57754000 | -0.62881300 | -1.37272900 |

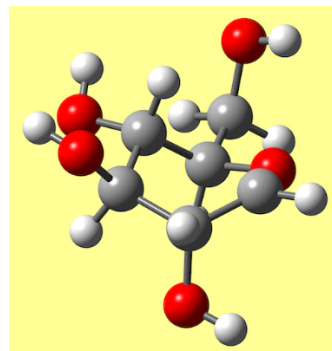

### Glucosyl radical: $^1S_3$ conformation

G = -611.110074

Charge 0 Multiplicity 2

|   |             |             |             |
|---|-------------|-------------|-------------|
| O | 0.64933700  | -1.26197500 | -0.88290300 |
| C | -1.44259900 | -0.80267800 | 0.37509900  |
| C | 0.25593800  | 0.96426700  | 0.11410900  |
| C | -1.19340100 | 0.59787400  | -0.15561900 |
| C | 1.17572000  | 0.06975100  | -0.71953800 |
| C | -0.29633600 | -1.68871100 | 0.01250400  |
| H | -1.52807800 | -0.73285000 | 1.46798800  |
| H | 0.46181600  | 0.83124300  | 1.17997400  |
| H | -1.37068800 | 0.60154600  | -1.24058000 |
| H | 1.24430100  | 0.49064300  | -1.72703800 |
| H | -0.43345200 | -2.76207200 | -0.00897100 |
| O | -2.65213700 | -1.35861500 | -0.14687700 |
| H | -3.38168900 | -0.86058400 | 0.24115700  |
| O | -2.08647400 | 1.48360200  | 0.49467900  |
| H | -1.82864400 | 2.37885600  | 0.24289600  |
| O | 0.51634400  | 2.33057600  | -0.16038900 |
| H | 0.37355700  | 2.48096000  | -1.10406900 |
| C | 2.56635600  | -0.04799100 | -0.12190600 |
| H | 2.97899300  | 0.95381300  | 0.01173400  |
| H | 3.20981900  | -0.60661700 | -0.80803000 |
| O | 2.53271500  | -0.66447400 | 1.15561400  |
| H | 2.20170900  | -1.56292400 | 1.03604500  |

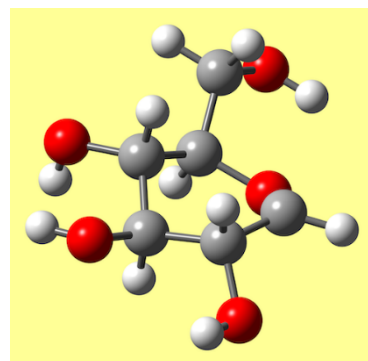



**Glucosyl radical:  $B_{2,5}$  conformation**

G = -611.108537

Charge 0 Multiplicity 2

|   |             |             |             |
|---|-------------|-------------|-------------|
| O | -0.10249900 | -1.53295000 | -0.72867900 |
| C | 1.88176400  | -0.45251500 | 0.21733100  |
| C | -0.26511500 | 0.83400800  | -0.21243300 |
| C | 1.23619400  | 0.93471600  | 0.10078900  |
| C | -0.83175900 | -0.56635700 | 0.03903400  |
| C | 1.25595600  | -1.39574400 | -0.73697700 |
| H | 2.94642100  | -0.36131000 | -0.01094900 |
| H | -0.38902700 | 1.03892800  | -1.28628800 |
| H | 1.35854800  | 1.44778100  | 1.05587500  |
| H | -0.75767700 | -0.81096800 | 1.10355600  |
| H | 1.76698100  | -2.22346900 | -1.20702900 |
| O | 1.70331200  | -0.85991100 | 1.58940200  |
| H | 1.95975600  | -1.78777900 | 1.64928900  |
| O | 1.90622400  | 1.72680400  | -0.86725200 |
| H | 1.85021400  | 1.26182500  | -1.71215500 |
| O | -0.94400700 | 1.80494700  | 0.56628400  |
| H | -1.89256200 | 1.63056900  | 0.47823700  |
| C | -2.27292000 | -0.71023400 | -0.43376100 |
| H | -2.57628200 | -1.75604300 | -0.33679800 |
| H | -2.33627500 | -0.42240600 | -1.48494500 |
| O | -3.15581600 | 0.14742200  | 0.28002900  |
| H | -3.21252100 | -0.17087100 | 1.18902900  |

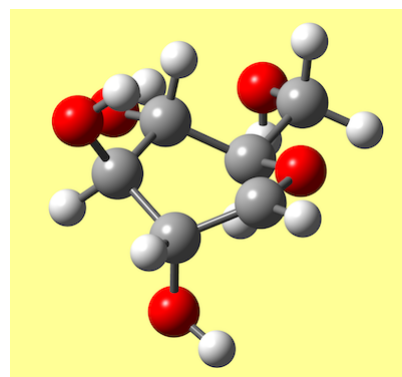

**Glucosyl radical:  $B_{0,3}$  conformation**

G = -611.108547

Charge 0 Multiplicity 2

|   |             |             |             |
|---|-------------|-------------|-------------|
| O | 0.74953500  | -1.19170600 | -0.59814800 |
| C | -1.47565900 | -0.86538600 | 0.42339900  |
| C | 0.04785200  | 1.05647100  | 0.21057200  |
| C | -1.30115700 | 0.50819300  | -0.21386600 |
| C | 1.16402600  | 0.16770700  | -0.35691600 |
| C | -0.23993200 | -1.67964500 | 0.21271200  |
| H | -1.66866100 | -0.71672300 | 1.49118000  |
| H | 0.08588300  | 1.06070700  | 1.30558100  |
| H | -1.31867000 | 0.39480800  | -1.30830700 |
| H | 1.44916900  | 0.55168700  | -1.33957500 |
| H | -0.28252700 | -2.76102300 | 0.23377100  |
| O | -2.65800700 | -1.50457800 | -0.06476000 |
| H | -2.51438900 | -1.70332400 | -0.99885600 |
| O | -2.31745200 | 1.39826900  | 0.20535100  |
| H | -3.15987300 | 0.96626200  | 0.01804200  |
| O | 0.25469000  | 2.40252900  | -0.17698000 |
| H | 0.18742800  | 2.44993700  | -1.13902100 |
| C | 2.37104200  | 0.13959400  | 0.55777000  |
| H | 2.07693900  | -0.31992600 | 1.51028000  |
| H | 2.69805700  | 1.16343400  | 0.74801400  |
| O | 3.45877400  | -0.55449500 | -0.02846700 |
| H | 3.14929700  | -1.44759800 | -0.21910900 |

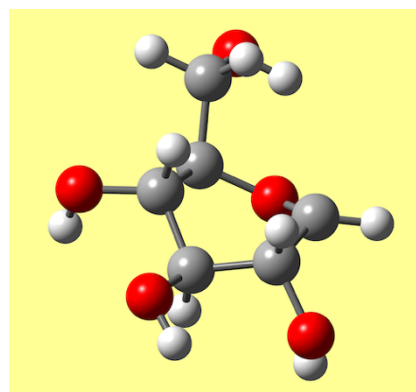

**Glucosyl radical:  $B_{1,4}$  conformation**

G = -611.106693

Charge 0 Multiplicity 2

|   |             |             |             |
|---|-------------|-------------|-------------|
| O | 0.55117500  | 1.05973900  | -1.31518000 |
| C | -1.23919100 | -0.47387000 | -0.57084400 |
| C | 0.27766300  | 0.71388600  | 1.09103200  |
| C | -0.77071400 | -0.39629800 | 0.90014200  |
| C | 1.25656300  | 0.85294900  | -0.07345900 |
| C | -0.76799800 | 0.70368300  | -1.36051700 |
| H | -0.82134200 | -1.39649500 | -0.99993500 |
| H | 0.84761200  | 0.49989200  | 1.99659300  |
| H | -1.63348300 | -0.10881800 | 1.50389300  |
| H | 1.82562400  | 1.76988400  | 0.09645000  |
| H | -1.21718800 | 0.91161400  | -2.32361900 |
| O | -2.65585400 | -0.49219200 | -0.68877100 |
| H | -2.96237900 | -1.33864700 | -0.34519200 |
| O | -0.33465200 | -1.65186700 | 1.38952900  |
| H | 0.41105400  | -1.91141400 | 0.82325000  |
| O | -0.37126000 | 1.96364900  | 1.30516500  |
| H | -0.93734800 | 2.13745200  | 0.54018200  |
| C | 2.26592400  | -0.26361900 | -0.24028600 |
| H | 2.85526200  | -0.33976100 | 0.67902500  |
| H | 2.93128000  | -0.00200900 | -1.06688300 |
| O | 1.59863100  | -1.48931600 | -0.52466100 |
| H | 2.26311400  | -2.16218600 | -0.70882600 |

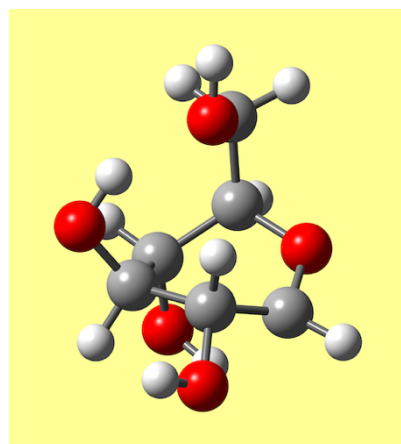

### Glucosyl radical: $^2S_0$ conformation

G = -611.105740

Charge 0 Multiplicity 2

|   |             |             |             |
|---|-------------|-------------|-------------|
| O | -0.34268200 | -1.26447900 | 1.18936700  |
| C | 1.39736400  | -0.67843700 | -0.44503800 |
| C | -0.41508700 | 0.96069200  | 0.08768700  |
| C | 1.08349000  | 0.71021900  | 0.10857300  |
| C | -1.19037500 | -0.27875800 | 0.58553800  |
| C | 0.68831100  | -1.69824900 | 0.39346200  |
| H | 1.08407200  | -0.70630300 | -1.49612700 |
| H | -0.70637700 | 1.16504900  | -0.94561200 |
| H | 1.43535700  | 0.74471200  | 1.15064600  |
| H | -1.86967200 | 0.03948600  | 1.37721300  |
| H | 1.22625200  | -2.53838400 | 0.81393300  |
| O | 2.80188000  | -0.89875200 | -0.47777100 |
| H | 3.11418800  | -0.91843400 | 0.43640200  |
| O | 1.71619300  | 1.71693400  | -0.65896900 |
| H | 2.64524100  | 1.46508900  | -0.73208900 |
| O | -0.75407200 | 2.13518000  | 0.80876500  |
| H | -0.49903200 | 2.00129200  | 1.72981300  |
| C | -2.00393700 | -0.93225400 | -0.52312500 |
| H | -2.45517700 | -1.85073200 | -0.13480000 |
| H | -1.35429000 | -1.18762300 | -1.36827500 |
| O | -2.99219000 | 0.01056300  | -0.90669300 |
| H | -3.41219700 | -0.30899100 | -1.71127900 |

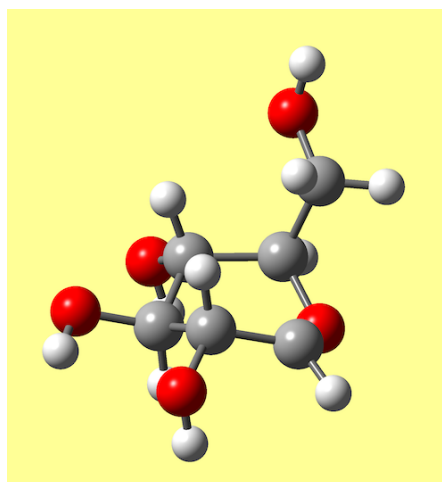

### Glucosyl radical: $^5S_1$ conformation

G = -611.105102

Charge 0 Multiplicity 2

|   |             |             |             |
|---|-------------|-------------|-------------|
| O | -0.02179300 | -1.70599500 | -0.74108600 |
| C | 1.36446200  | 0.35066200  | -0.62521500 |
| C | -0.39046000 | -0.20379400 | 1.12963100  |
| C | 0.57783500  | 0.86171700  | 0.59735100  |
| C | -1.03288100 | -0.98718600 | -0.00985200 |
| C | 1.21825400  | -1.12790700 | -0.79416800 |
| H | 0.97259000  | 0.87973800  | -1.50845100 |
| H | -1.17412100 | 0.29059800  | 1.70537400  |
| H | 1.29643400  | 1.08534300  | 1.39040500  |
| H | -1.67845600 | -1.75410100 | 0.42017400  |
| H | 1.90104800  | -1.66212300 | -1.44186800 |
| O | 2.75894900  | 0.59818800  | -0.51500200 |
| H | 2.89414700  | 1.54779000  | -0.60978300 |
| O | -0.12324000 | 2.04150400  | 0.21056100  |
| H | -0.39620200 | 2.50058700  | 1.01427800  |
| O | 0.26650600  | -1.09059100 | 2.02247100  |
| H | 0.97288400  | -1.53572800 | 1.53466700  |
| C | -1.82379600 | -0.12795300 | -1.00207000 |
| H | -2.43210400 | -0.78746500 | -1.62187100 |
| H | -1.13568700 | 0.40865900  | -1.66132300 |
| O | -2.69945500 | 0.77232800  | -0.34514500 |
| H | -2.14874700 | 1.50999500  | -0.05005500 |

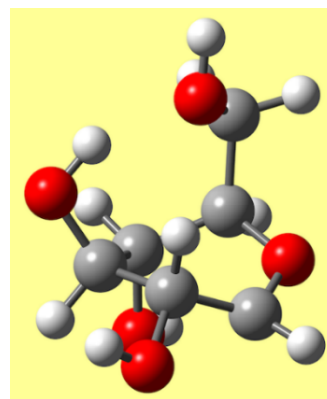

**Methyl acrylate****Solvent=SMD:water**

G = -306.359645

Charge 0 Multiplicity 1

|   |             |             |             |
|---|-------------|-------------|-------------|
| C | -2.47725900 | -0.00130400 | 0.00002700  |
| H | -2.50691500 | 1.08323800  | 0.00017900  |
| H | -3.42015800 | -0.53443500 | -0.00004100 |
| C | -1.31843600 | -0.64883700 | -0.00007200 |
| H | -1.24841900 | -1.72953900 | -0.00022500 |
| C | -0.04275700 | 0.10435700  | 0.00002200  |
| O | 0.05962800  | 1.31149400  | 0.00020800  |
| O | 1.01094200  | -0.71608500 | -0.00012600 |
| C | 2.29866800  | -0.08114500 | -0.00005400 |
| H | 2.41276000  | 0.53410200  | 0.89226400  |
| H | 3.02416100  | -0.88946800 | -0.00021200 |
| H | 2.41271000  | 0.53440600  | -0.89216900 |

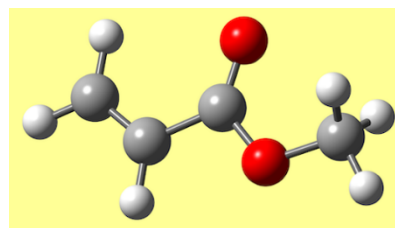**Solvent=SMD:dichloromethane**

G = -306.362163

Charge 0 Multiplicity 1

|   |             |             |             |
|---|-------------|-------------|-------------|
| C | -2.47690300 | -0.00310200 | 0.00004100  |
| H | -2.50187400 | 1.08177600  | 0.00020800  |
| H | -3.42109400 | -0.53466900 | -0.00002400 |
| C | -1.31752600 | -0.64898000 | -0.00007900 |
| H | -1.24688100 | -1.73009200 | -0.00024600 |
| C | -0.04037900 | 0.10981100  | 0.00001500  |
| O | 0.05938800  | 1.31128900  | 0.00019500  |
| O | 1.01039700  | -0.71641400 | -0.00012600 |
| C | 2.29514900  | -0.08355300 | -0.00004600 |
| H | 2.41337200  | 0.53480800  | 0.89046800  |
| H | 3.02280200  | -0.89096900 | -0.00018300 |
| H | 2.41334600  | 0.53508700  | -0.89037000 |

**$\alpha$ -Adduct 8a**

G = -917.505711

Charge 0 Multiplicity 2

|   |             |             |             |
|---|-------------|-------------|-------------|
| C | 0.49176200  | 1.08712900  | 0.06353000  |
| C | 1.99990700  | 0.96308700  | 0.27684800  |
| C | 2.35178500  | -0.49126200 | 0.52194600  |
| C | 1.85577100  | -1.34002200 | -0.63400400 |
| C | 0.35961100  | -1.13224400 | -0.88193700 |
| O | 0.08695400  | 0.25819800  | -1.03040300 |
| C | -0.54508600 | -1.78437000 | 0.18404500  |
| C | -1.96617700 | -1.62151700 | -0.19899500 |
| C | -2.78245600 | -0.56838700 | 0.35820300  |
| O | 2.08841600  | -2.71741900 | -0.40135000 |
| O | 3.75614400  | -0.68490200 | 0.60184000  |
| O | 2.41436900  | 1.69352700  | 1.42275000  |
| C | 0.04780100  | 2.48982600  | -0.29592700 |
| O | 0.66662500  | 2.95294000  | -1.48776300 |
| O | -4.01833800 | -0.54070700 | -0.17470100 |
| O | -2.42374600 | 0.22076200  | 1.21911200  |
| C | -4.88975600 | 0.47736200  | 0.33309500  |
| H | -0.01805800 | 0.78999600  | 0.98633500  |
| H | 2.52885500  | 1.31309200  | -0.61606800 |
| H | 1.87625900  | -0.81788600 | 1.45651500  |
| H | 2.38880700  | -1.01427000 | -1.53663600 |
| H | 0.11082300  | -1.57388000 | -1.84889900 |
| H | -0.36117500 | -1.35332500 | 1.16980300  |
| H | -0.28961800 | -2.84517300 | 0.21864600  |
| H | -2.40172000 | -2.24105800 | -0.97252800 |
| H | 3.02475500  | -2.81155900 | -0.18908000 |
| H | 4.07754600  | -0.14176900 | 1.33110200  |
| H | 2.55414900  | 2.61120200  | 1.16593400  |
| H | -1.04326600 | 2.49757000  | -0.39316700 |
| H | 0.32867900  | 3.17741900  | 0.50309300  |
| H | 0.46279000  | 2.30864700  | -2.17588400 |
| H | -5.83128500 | 0.34783500  | -0.19329400 |
| H | -5.03473200 | 0.35090600  | 1.40628100  |
| H | -4.47516000 | 1.46545500  | 0.13115000  |

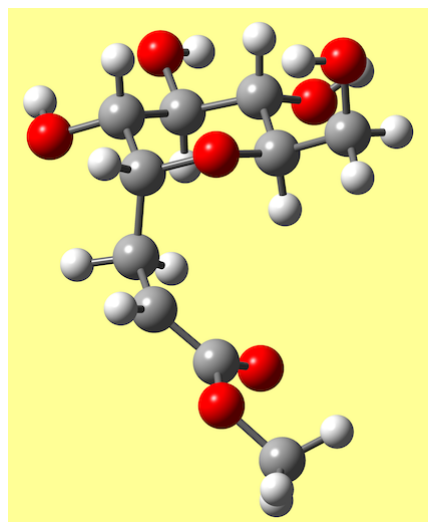

### $\beta$ -Adduct 8 $\beta$

G = -917.509483

Charge 0 Multiplicity 2

|   |             |             |             |
|---|-------------|-------------|-------------|
| C | -2.31558100 | -0.70533800 | 0.46861500  |
| C | -2.28436800 | 0.42898800  | -0.55240900 |
| C | -1.43967700 | 1.57788800  | -0.03513400 |
| C | -0.06154100 | 1.07608500  | 0.35188400  |
| C | -0.21458200 | -0.05564900 | 1.37059000  |
| O | -0.98430100 | -1.10305400 | 0.79015600  |
| C | 1.12189500  | -0.64590700 | 1.83203500  |
| C | 1.93633300  | -1.20284900 | 0.72235200  |
| C | 2.91166000  | -0.37950000 | 0.04328800  |
| O | 0.66739700  | 2.16643000  | 0.88773700  |
| O | -1.37174100 | 2.55181500  | -1.06483400 |
| O | -3.62329200 | 0.84105900  | -0.77409000 |
| C | -3.02194600 | -1.94239000 | -0.04942000 |
| O | -2.40897000 | -2.44623400 | -1.22723200 |
| O | 3.62369900  | -1.05448300 | -0.86730700 |
| O | 3.08607100  | 0.81457000  | 0.25931900  |
| C | 4.60424500  | -0.29168500 | -1.58561100 |
| H | -2.82710000 | -0.35214600 | 1.37461800  |
| H | -1.83641000 | 0.05829200  | -1.48243600 |
| H | -1.92413300 | 2.00247500  | 0.85535000  |
| H | 0.43051600  | 0.69014100  | -0.55072100 |
| H | -0.73958800 | 0.33554400  | 2.25254600  |
| H | 1.82146200  | -2.22686000 | 0.39411800  |
| H | 1.60635500  | 1.93656300  | 0.81182500  |
| H | -0.82064900 | 3.27278100  | -0.73803500 |
| H | -3.59213800 | 1.60476100  | -1.36238600 |
| H | -3.02596400 | -2.69981900 | 0.74107300  |
| H | -4.05275600 | -1.69449100 | -0.30181900 |
| H | -1.48160800 | -2.60487900 | -1.01537300 |
| H | 5.07531400  | -0.99169400 | -2.26962600 |
| H | 4.12194400  | 0.51490100  | -2.13775800 |
| H | 5.34007000  | 0.12002900  | -0.89492100 |
| H | 1.67386200  | 0.14828800  | 2.34042100  |
| H | 0.90128400  | -1.43256400 | 2.55599500  |

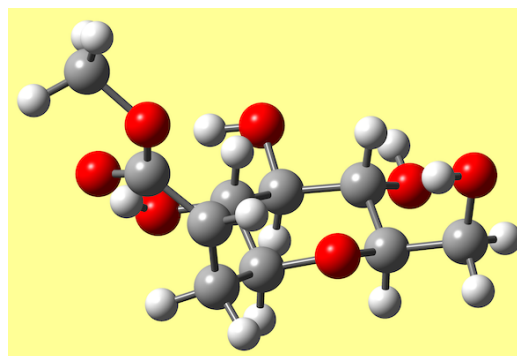



**<sup>4</sup>C<sub>1</sub> α-transition state**

G<sup>‡</sup> = -917.826902

Glc-C1 – methyl acrylate-Cβ: 2.38051 Å

Charge 0 Multiplicity 2

|   |             |             |             |
|---|-------------|-------------|-------------|
| C | 0.32678700  | 0.99583800  | -0.06238500 |
| C | 1.80932500  | 1.09432700  | 0.28603900  |
| C | 2.32935500  | -0.30322700 | 0.56654000  |
| C | 2.11534700  | -1.17954500 | -0.65481400 |
| C | 0.72501100  | -1.04806700 | -1.20333700 |
| O | 0.15685100  | 0.18280900  | -1.23945300 |
| C | -0.73429100 | -2.27992200 | 0.21786300  |
| C | -1.96646500 | -1.90162800 | -0.19069700 |
| C | -2.65478100 | -0.77712400 | 0.43684200  |
| O | 2.34548000  | -2.54972200 | -0.37686300 |
| O | 3.71778300  | -0.30514600 | 0.84952000  |
| O | 1.99399700  | 1.85587200  | 1.46809200  |
| C | -0.32986200 | 2.32144300  | -0.37216700 |
| O | 0.32813700  | 3.01220800  | -1.42327900 |
| O | -3.78917100 | -0.45613500 | -0.21198200 |
| O | -2.28988300 | -0.17488400 | 1.43218800  |
| C | -4.53614800 | 0.63526800  | 0.34028400  |
| H | -0.19992200 | 0.52281900  | 0.77248100  |
| H | 2.36408100  | 1.53169200  | -0.55101200 |
| H | 1.76766000  | -0.72177300 | 1.41238700  |
| H | 2.82251100  | -0.83493300 | -1.42765200 |
| H | 0.47656400  | -1.63491000 | -2.07972000 |
| H | -0.29132400 | -1.84205700 | 1.10727500  |
| H | -0.26732400 | -3.17222200 | -0.17871200 |
| H | -2.45942300 | -2.36796100 | -1.03447100 |
| H | 3.27368000  | -2.63666300 | -0.13023600 |
| H | 3.84977400  | 0.26156600  | 1.61883800  |
| H | 2.00493500  | 2.78977300  | 1.23141600  |
| H | -1.38253400 | 2.14069600  | -0.61774000 |
| H | -0.28674600 | 2.95815000  | 0.51223000  |
| H | 0.30416800  | 2.43913000  | -2.19858100 |
| H | -5.41110400 | 0.74422600  | -0.29461700 |
| H | -4.83607100 | 0.41005600  | 1.36387900  |
| H | -3.94014700 | 1.54820700  | 0.32343300  |

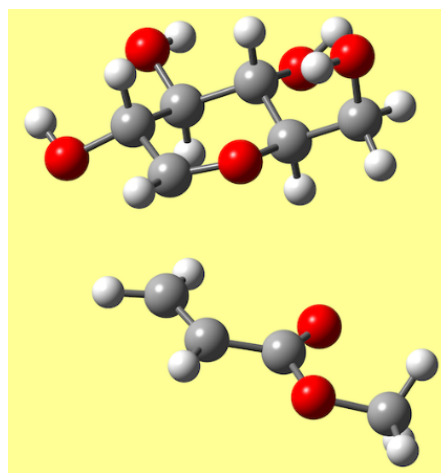

**$^4C_1$   $\beta$ -transition state**

$G^\ddagger = -917.451405$

Glc-C1 – methyl acrylate-C $\beta$ : 2.34180 Å

Charge 0 Multiplicity 2

|   |             |             |             |
|---|-------------|-------------|-------------|
| O | -0.41650300 | 0.75567300  | 0.25056800  |
| C | -2.75737000 | 0.09076700  | 0.08581000  |
| C | -2.31044200 | -1.28970800 | -0.36695300 |
| C | -0.93435200 | -1.60835300 | 0.20669400  |
| C | 0.00202100  | -0.49555100 | -0.12828700 |
| C | -1.70039900 | 1.13776100  | -0.27682800 |
| C | 1.76940100  | -0.86669400 | 1.36256300  |
| C | 2.67018000  | 0.11933200  | 1.17424000  |
| C | 3.67456200  | -0.00625000 | 0.11623500  |
| O | -0.40835500 | -2.80563600 | -0.33258800 |
| O | -3.19800600 | -2.30082100 | 0.08026400  |
| O | -3.98868500 | 0.35608000  | -0.56638100 |
| C | -1.98045400 | 2.49857400  | 0.33332800  |
| O | -3.22990800 | 2.95692600  | -0.17301100 |
| O | 4.53290600  | 1.02530300  | 0.10916200  |
| O | 3.74624900  | -0.91996200 | -0.68426300 |
| C | 5.54889400  | 0.98607900  | -0.90195100 |
| H | -1.63744300 | 1.21477100  | -1.36936000 |
| H | -2.88797000 | 0.08251500  | 1.17701600  |
| H | -2.24315100 | -1.29527500 | -1.46276900 |
| H | -1.03985700 | -1.68433400 | 1.29929600  |
| H | 0.60619900  | -0.55962300 | -1.03070600 |
| H | 2.65402200  | 1.04012600  | 1.74271700  |
| H | -1.04590300 | -3.50538200 | -0.14762100 |
| H | -4.05195300 | -2.14753200 | -0.34058700 |
| H | -4.19432900 | 1.28843700  | -0.40460500 |
| H | -2.01269700 | 2.39383600  | 1.42234300  |
| H | -1.17268400 | 3.18503600  | 0.06440800  |
| H | -3.50921000 | 3.71492100  | 0.35120600  |
| H | 6.14100200  | 1.88564300  | -0.75898700 |
| H | 6.17024500  | 0.09898500  | -0.77863400 |
| H | 5.09519200  | 0.98384400  | -1.89314900 |
| H | 1.05597700  | -0.81389700 | 2.17714200  |
| H | 1.87873000  | -1.81831800 | 0.85319000  |

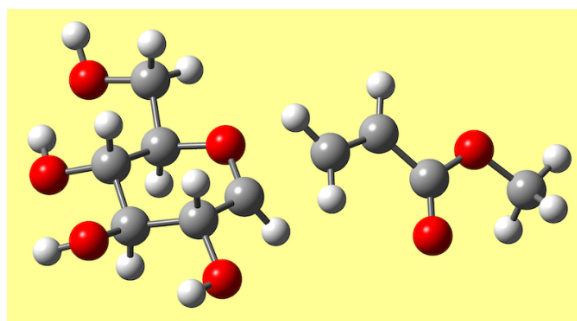

**$^1C_4$   $\alpha$ -transition state**

$G^\ddagger = -917.450244$

Glc-C1 – methyl acrylate-C $\beta$ : 2.31764 Å

Charge 0 Multiplicity 2

|   |             |             |             |
|---|-------------|-------------|-------------|
| O | -0.54008000 | 0.12103500  | -1.00240900 |
| C | -1.35156400 | -1.16905200 | 0.89500300  |
| C | -2.95273000 | 0.21728400  | -0.47538700 |
| C | -2.65914300 | -0.34369500 | 0.92747500  |
| C | -1.75031100 | 0.90516500  | -1.14235600 |
| C | -0.26981000 | -0.36171500 | 0.25795800  |
| H | -1.06182700 | -1.42563300 | 1.91709100  |
| H | -3.76029900 | 0.94860300  | -0.39590400 |
| H | -3.48085400 | -1.01542200 | 1.18865200  |
| H | -1.96031600 | 0.90416700  | -2.21313800 |
| H | 0.37329600  | 0.25135100  | 0.87941000  |
| O | -1.55537800 | -2.34792000 | 0.10745400  |
| H | -2.22443800 | -2.88533300 | 0.55018300  |
| O | -2.60891900 | 0.65489100  | 1.92429400  |
| H | -2.03012800 | 1.37358700  | 1.60797300  |
| O | -3.42508900 | -0.82752200 | -1.31847700 |
| H | -2.78527500 | -1.55059700 | -1.24521500 |
| C | -1.48838100 | 2.34916900  | -0.76314200 |
| H | -0.69306300 | 2.73354900  | -1.40696800 |
| H | -2.40100300 | 2.92597200  | -0.94193900 |
| O | -1.08573800 | 2.44161200  | 0.60171400  |
| H | -1.03015500 | 3.37227200  | 0.84555400  |
| C | 1.45478300  | -1.83867100 | -0.20663300 |
| H | 2.51024200  | -0.97926400 | -1.85523200 |
| C | 3.36904000  | -0.35591500 | 0.05419700  |
| O | 3.32490300  | -0.27741300 | 1.26866900  |
| O | 4.31431400  | 0.26309600  | -0.67145300 |
| C | 5.27567500  | 1.02362000  | 0.07215400  |
| H | 5.95173500  | 1.44588500  | -0.66605200 |
| H | 4.77907300  | 1.81780000  | 0.62989700  |
| H | 5.82067200  | 0.37585400  | 0.75894600  |
| C | 2.42866400  | -1.09935800 | -0.78275800 |
| H | 0.78658400  | -2.43881300 | -0.81078800 |
| H | 1.47631600  | -2.03721200 | 0.86013100  |

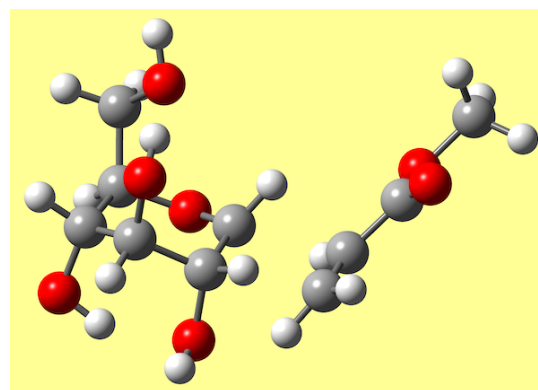

**$^1C_4$   $\beta$ -transition state**

$G^\ddagger = -917.456565$

Glc-C1 – methyl acrylate-C $\beta$ : 2.34900 Å

Charge 0 Multiplicity 2

|   |             |             |             |
|---|-------------|-------------|-------------|
| O | 1.91094900  | 0.50683400  | 1.20500400  |
| C | 0.23548000  | -1.18803100 | 0.59115000  |
| C | 2.32984000  | -0.93916900 | -0.76673900 |
| C | 0.83556700  | -1.27339900 | -0.81789700 |
| C | 2.61324900  | 0.38292700  | -0.05344000 |
| C | 0.63217500  | 0.06329700  | 1.30717500  |
| H | -0.85614900 | -1.23751500 | 0.54008900  |
| H | 2.70332900  | -0.85119100 | -1.78975700 |
| H | 0.73438800  | -2.30936200 | -1.16307500 |
| H | 3.66381000  | 0.37898500  | 0.24110100  |
| H | 0.26771100  | 0.18235400  | 2.32061600  |
| O | 0.72703700  | -2.28425500 | 1.38463400  |
| H | 0.36423700  | -3.10097900 | 1.01726400  |
| O | 0.21449300  | -0.37835100 | -1.71823800 |
| H | -0.73929100 | -0.33370300 | -1.52915500 |
| O | 3.04743600  | -2.00100600 | -0.15353000 |
| H | 2.55920100  | -2.24578900 | 0.64638500  |
| C | 2.36653500  | 1.63372000  | -0.88425600 |
| H | 3.02596500  | 1.60324700  | -1.75340900 |
| H | 1.33601700  | 1.68046200  | -1.23589900 |
| O | 2.70153600  | 2.79722800  | -0.14160200 |
| H | 2.14723100  | 2.79318000  | 0.64746200  |
| C | -0.90013600 | 1.69225600  | 0.58861700  |
| H | -0.36618000 | 2.38595300  | 1.22749400  |
| H | -0.54063300 | 1.56933300  | -0.42517600 |
| C | -2.14459600 | 1.26584000  | 0.91409900  |
| H | -2.60183700 | 1.47795300  | 1.87198700  |
| C | -2.91235600 | 0.45883700  | -0.02605000 |
| O | -2.50788900 | 0.02357500  | -1.09715100 |
| O | -4.15893400 | 0.22419500  | 0.40143600  |
| C | -4.98573700 | -0.56693300 | -0.46395300 |
| H | -5.94195800 | -0.65353600 | 0.04414800  |
| H | -5.11000500 | -0.06921800 | -1.42549900 |
| H | -4.54297900 | -1.55199900 | -0.61123800 |

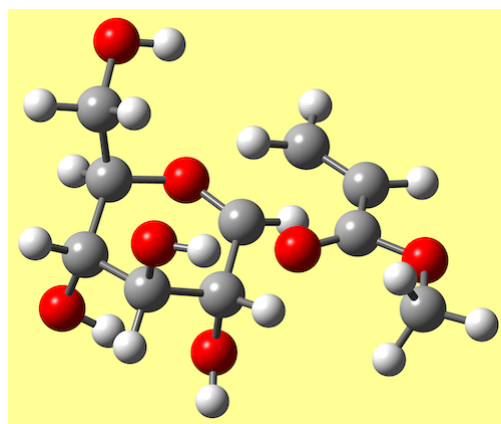

**$E_3$   $\beta$ -transition state (from  $^1S_3$  glucosyl radical)**

$G^\ddagger = -917.453977$

Glc-C1 – methyl acrylate-C $\beta$ : 2.37763 Å

Charge 0 Multiplicity 2

|   |             |             |             |
|---|-------------|-------------|-------------|
| C | 2.17497600  | -1.71080600 | 0.56884400  |
| H | 2.57454500  | -2.65976500 | 0.23499400  |
| C | 3.00087000  | -0.53143100 | 0.35158700  |
| O | 2.68462500  | 0.62261900  | 0.60376400  |
| O | 4.19730000  | -0.83714200 | -0.17078300 |
| C | 5.07636300  | 0.26802400  | -0.42039700 |
| H | 5.29153900  | 0.79746200  | 0.50769900  |
| H | 5.98499700  | -0.16664900 | -0.82742100 |
| H | 4.62782900  | 0.95207500  | -1.14107100 |
| C | 0.93548800  | -1.59878500 | 1.09560400  |
| H | 0.59466300  | -0.65862800 | 1.51813700  |
| H | 0.35319600  | -2.48502900 | 1.32072800  |
| O | -0.28557000 | 0.18189600  | -0.99189600 |
| C | -1.93560600 | -1.45343600 | -0.07244300 |
| C | -2.23924100 | 0.93731200  | 0.35606600  |
| C | -2.90593400 | -0.29756300 | -0.21912000 |
| C | -1.01253900 | 1.31467100  | -0.47219000 |
| C | -0.59778800 | -1.09237100 | -0.64959800 |
| H | -1.84979500 | -1.65727900 | 1.00575700  |
| H | -1.94893400 | 0.72485200  | 1.39093100  |
| H | -3.12975800 | -0.13681200 | -1.28316200 |
| H | -1.35045200 | 1.86049700  | -1.35923900 |
| H | -0.13413700 | -1.81090100 | -1.31315600 |
| O | -2.38377800 | -2.62500200 | -0.73705100 |
| H | -3.15874500 | -2.94430000 | -0.25939900 |
| O | -4.08221000 | -0.62708200 | 0.49516600  |
| H | -4.62183600 | 0.17230700  | 0.53393800  |
| O | -3.13856200 | 2.03067800  | 0.43121300  |
| H | -3.41859100 | 2.25125900  | -0.46694800 |
| C | -0.06502600 | 2.19000200  | 0.32589400  |
| H | -0.62315100 | 3.06990400  | 0.65404800  |
| H | 0.27372000  | 1.64400000  | 1.21261500  |
| O | 1.03823900  | 2.62473200  | -0.44736300 |
| H | 1.70518500  | 1.92771400  | -0.37833000 |

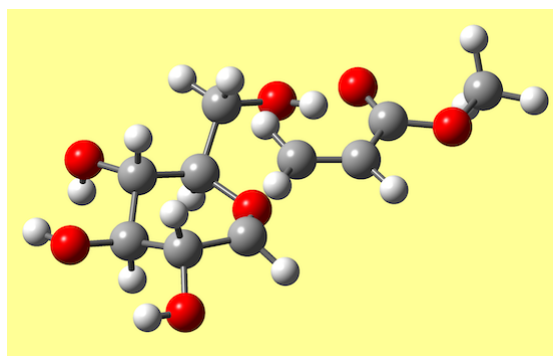

### $^1S_5$ $\beta$ -transition state

$G^\ddagger = -917.455529$

Glc-C1 – methyl acrylate-C $\beta$ : 2.36640 Å

Charge 0 Multiplicity 2

|   |             |             |             |
|---|-------------|-------------|-------------|
| C | -1.81357700 | -2.05710700 | -0.08519100 |
| H | -2.30168800 | -2.75507300 | 0.58270100  |
| C | -2.48314500 | -0.79257800 | -0.34357600 |
| O | -2.05457600 | 0.10123100  | -1.06256600 |
| O | -3.64670600 | -0.67537200 | 0.30986200  |
| C | -4.33769700 | 0.56997900  | 0.13608400  |
| H | -4.60773900 | 0.70943200  | -0.91061900 |
| H | -5.22983300 | 0.49894700  | 0.75184200  |
| H | -3.71019300 | 1.39741900  | 0.46922900  |
| C | 1.43975000  | 0.90167200  | -0.62847500 |
| C | 0.96293000  | 1.16430600  | 0.79805000  |
| H | 0.56487600  | 0.65813200  | -1.23735300 |
| O | 2.01015900  | 2.06572100  | -1.19898200 |
| C | 2.40085000  | -0.28637900 | -0.67381700 |
| O | 0.23369400  | 0.01221300  | 1.27355900  |
| H | 1.82396600  | 1.31556100  | 1.45861700  |
| C | 0.04986000  | 2.36844400  | 0.92136000  |
| C | 2.19232000  | -1.25070400 | 0.50725900  |
| H | 3.42512100  | 0.09423000  | -0.58758100 |
| O | 2.21341600  | -0.92590400 | -1.92488500 |
| H | -0.42582000 | 2.32806600  | 1.90763500  |
| O | -0.91293500 | 2.47781500  | -0.11158900 |
| H | 0.66252700  | 3.26915400  | 0.87727400  |
| H | 2.40558900  | -2.27121100 | 0.17493500  |
| O | 3.14009900  | -0.85626600 | 1.51492100  |
| H | 3.00399300  | -1.42406600 | 2.28309000  |
| H | 2.90743100  | -1.58660700 | -2.03166600 |
| H | 2.78673900  | 2.30367200  | -0.67647200 |
| H | -1.35887800 | 1.62574600  | -0.23173000 |
| C | 0.80330000  | -1.20037700 | 1.05158300  |
| H | 0.48774400  | -1.94387400 | 1.77371100  |
| C | -0.56455600 | -2.25620500 | -0.56521100 |
| H | -0.05416000 | -3.20019000 | -0.41223400 |
| H | -0.14508600 | -1.58116000 | -1.30233300 |

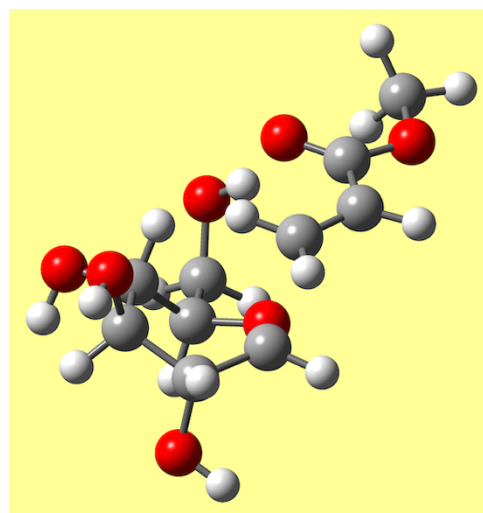

**$^{\circ}S_2$   $\alpha$ -transition state**

$G^{\ddagger} = -917.457449$

Glc-C1 – methyl acrylate-C $\beta$ : 2.39790 Å

Charge 0 Multiplicity 2

|   |             |             |             |
|---|-------------|-------------|-------------|
| H | 1.01166800  | 1.26230700  | -1.13302800 |
| H | 0.80024400  | 2.69073600  | 0.02024600  |
| H | 2.98887100  | 2.17121900  | 1.06696200  |
| H | 4.96929400  | -1.64130600 | 0.29635800  |
| H | 5.57626600  | -0.70905100 | -1.09876300 |
| H | 6.36668200  | -0.54473100 | 0.49553200  |
| C | 1.35521000  | 1.80316500  | -0.25810500 |
| O | 2.96687300  | -0.46991700 | -0.91578600 |
| C | 3.35663900  | 0.41316800  | -0.16114200 |
| O | 4.58883100  | 0.40291200  | 0.35634900  |
| C | 2.57177700  | 1.55963600  | 0.27738500  |
| C | 5.42351700  | -0.70238900 | -0.01973400 |
| O | -1.50251800 | 1.16247800  | 0.50653800  |
| C | -0.14600300 | -0.87365200 | 0.59857800  |
| C | -2.45271100 | -0.94853200 | -0.35020100 |
| C | -1.51856800 | -1.54948500 | 0.70703700  |
| C | -2.14379600 | 0.54006000  | -0.61847600 |
| C | -0.34238200 | 0.58382100  | 0.91717900  |
| H | 0.55996000  | -1.29706400 | 1.31906400  |
| H | -3.47344800 | -1.04797600 | 0.02179100  |
| H | -1.41478000 | -2.61991000 | 0.50521100  |
| H | -1.47349000 | 0.60373000  | -1.48128000 |
| H | -0.02573500 | 0.96743300  | 1.87827400  |
| O | 0.27722800  | -1.14120800 | -0.73683900 |
| H | 1.21607200  | -0.89874300 | -0.82770700 |
| O | -2.10685100 | -1.31809500 | 1.97542300  |
| H | -1.50929400 | -1.65956700 | 2.65089700  |
| O | -2.39419400 | -1.65993200 | -1.57536300 |
| H | -1.46581500 | -1.64899700 | -1.84646100 |
| C | -3.39526500 | 1.34834500  | -0.88201700 |
| H | -3.92711200 | 0.90657800  | -1.72616200 |
| H | -3.11777800 | 2.37576500  | -1.13796400 |
| O | -4.27423500 | 1.32454300  | 0.23214200  |
| H | -3.77318200 | 1.63850700  | 0.99429400  |

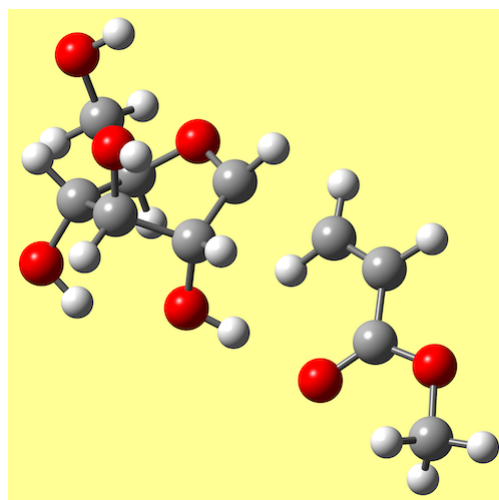

**$^{\circ}S_2$   $\alpha$ -transition state (from  $B_{2,5}$  conformation)**

$G^{\ddagger} = -917.454709$

Glc-C1 – methyl acrylate-C $\beta$ : 2.39667 Å

Charge 0 Multiplicity 2

|   |             |             |             |
|---|-------------|-------------|-------------|
| H | -0.99930400 | -1.62331800 | -0.50194900 |
| H | -0.92815800 | -2.47482600 | 1.13680500  |
| H | -3.16920800 | -1.57403200 | 1.70407100  |
| H | -4.95185500 | 1.61626700  | -0.68626500 |
| H | -5.47325200 | 0.20396400  | -1.64374300 |
| H | -6.39722700 | 0.68789700  | -0.19255600 |
| C | -1.42768700 | -1.76997600 | 0.48340600  |
| O | -2.90155200 | 0.05393000  | -1.15682200 |
| C | -3.37926000 | -0.45205800 | -0.14885000 |
| O | -4.64701100 | -0.23367400 | 0.21493400  |
| C | -2.67155000 | -1.32917600 | 0.77460800  |
| C | -5.41012500 | 0.62839800  | -0.64200900 |
| O | 1.39188400  | -0.87644800 | 1.17204300  |
| C | 0.08943200  | 1.01713100  | 0.31628600  |
| C | 2.55990300  | 0.79683200  | -0.16464000 |
| C | 1.44482700  | 1.73842500  | 0.30771300  |
| C | 2.16479900  | -0.68227200 | -0.01679000 |
| H | -0.67907000 | 1.67455400  | 0.73578100  |
| H | 3.43498400  | 0.99524000  | 0.46582200  |
| H | 1.39381300  | 2.58445800  | -0.38403600 |
| H | 1.56732400  | -0.96629300 | -0.88833800 |
| O | -0.19649300 | 0.72212500  | -1.04513500 |
| H | -1.13110800 | 0.46071400  | -1.11146300 |
| O | 1.78209000  | 2.16331200  | 1.61891800  |
| H | 1.07842800  | 2.74199000  | 1.93472200  |
| O | 2.85521900  | 1.08096300  | -1.52330500 |
| H | 3.55940300  | 0.46899300  | -1.77636000 |
| C | 3.37765600  | -1.58643400 | 0.10663300  |
| H | 3.06126300  | -2.62910400 | 0.19199100  |
| H | 3.94035300  | -1.31350300 | 1.00150800  |
| O | 4.24670300  | -1.39969300 | -1.00526900 |
| H | 3.84324000  | -1.82706300 | -1.77003300 |
| C | 0.21762700  | -0.18670800 | 1.21158500  |
| H | -0.19007900 | -0.15501300 | 2.21345800  |

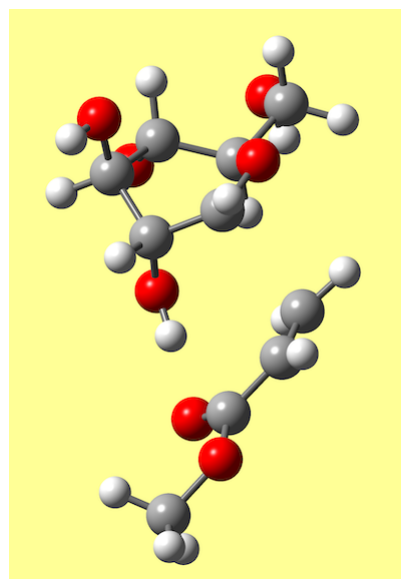



**Tetraacetylglucosyl radical:  $B_{2,5}$  conformation ( $^1S_5$ -like)**

G = -1221.552778

Charge 0 Multiplicity 2

|   |             |             |             |
|---|-------------|-------------|-------------|
| O | 0.26918200  | -2.05431300 | -0.86971100 |
| C | -0.36909400 | -1.48826300 | 0.27868100  |
| C | -0.46150600 | 0.02197500  | 0.06556100  |
| C | 0.92784400  | 0.62767000  | 0.12205100  |
| C | 1.95803600  | -0.30743600 | -0.53871200 |
| C | 1.31936800  | -1.35346900 | -1.36745800 |
| H | 0.23065700  | -1.71412300 | 1.16938400  |
| H | -0.90992900 | 0.21248400  | -0.91081400 |
| H | 1.22246200  | 0.79339600  | 1.15959900  |
| H | 2.65869400  | 0.26336800  | -1.14638800 |
| H | 1.82884400  | -1.85421400 | -2.17673900 |
| O | 2.69889000  | -0.89160300 | 0.58040400  |
| O | 0.84705400  | 1.88126900  | -0.55767700 |
| O | -1.26692300 | 0.59332600  | 1.09229100  |
| C | -1.72034300 | -2.14543600 | 0.43365700  |
| H | -1.60595300 | -3.22772300 | 0.36495200  |
| H | -2.15683400 | -1.88044600 | 1.39462700  |
| O | -2.58154700 | -1.72932500 | -0.63149600 |
| C | 3.89597800  | -1.42568600 | 0.27810500  |
| C | -2.31154200 | 1.37784600  | 0.72802000  |
| C | 1.86092200  | 2.74583600  | -0.33492200 |
| C | -3.74703400 | -1.13052400 | -0.31315600 |
| O | 4.34590400  | -1.43642600 | -0.83753700 |
| O | -2.59964000 | 1.60116200  | -0.41595700 |
| O | 2.79546000  | 2.47616900  | 0.37090500  |
| O | -4.10867300 | -0.94154700 | 0.81911900  |
| C | -4.50222300 | -0.74741000 | -1.54729700 |
| H | -3.87605000 | -0.09865300 | -2.16097200 |
| H | -5.41798200 | -0.23240700 | -1.26765400 |
| H | -4.73370200 | -1.64495500 | -2.12393000 |
| C | 1.64893500  | 4.02880500  | -1.07595900 |
| H | 2.46950200  | 4.71050300  | -0.86706000 |
| H | 0.69906300  | 4.47214100  | -0.77259700 |
| H | 1.59397600  | 3.82066000  | -2.14611400 |
| C | -3.02741400 | 1.89297400  | 1.93562000  |

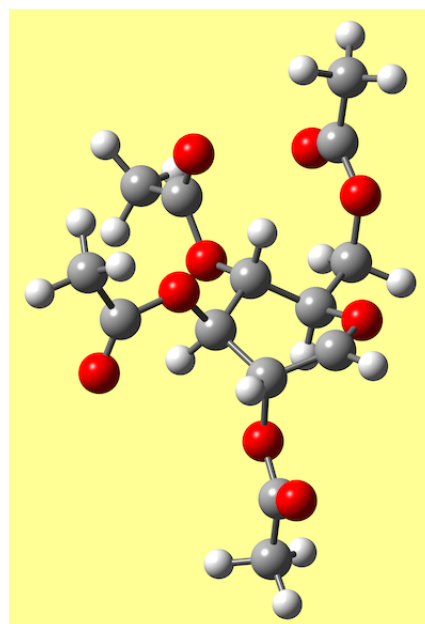

|   |             |             |            |
|---|-------------|-------------|------------|
| H | -3.86450100 | 2.51288900  | 1.62440500 |
| H | -2.33570700 | 2.46960400  | 2.55228000 |
| C | 4.56584600  | -1.98069400 | 1.49900000 |
| H | 3.92553600  | -2.73984800 | 1.95149800 |
| H | 4.70658900  | -1.18135900 | 2.22859000 |
| H | 5.52516800  | -2.41229800 | 1.22420000 |
| H | -3.38413300 | 1.04413000  | 2.52086700 |

**Tetraacetylglucosyl radical:  ${}^4C_1$  conformation**

G = -1221.550765

Charge 0 Multiplicity 2

|   |             |             |             |
|---|-------------|-------------|-------------|
| O | 1.00059500  | -1.80143200 | 0.24605100  |
| C | -1.39327400 | -1.33744700 | 0.24346500  |
| C | 0.27591800  | 0.52376600  | 0.24329200  |
| C | -1.11581200 | 0.08707300  | -0.20327600 |
| C | 1.32372600  | -0.49231300 | -0.21775000 |
| C | -0.24396500 | -2.24557400 | -0.06861400 |
| H | -1.60621200 | -1.33661800 | 1.32064600  |
| H | 0.30138500  | 0.65185800  | 1.32914900  |
| H | -1.18612900 | 0.16119200  | -1.29107600 |
| H | 1.34893900  | -0.50026300 | -1.31386500 |
| C | 2.68812900  | -0.15314100 | 0.32899200  |
| O | 0.63233900  | 1.74666700  | -0.40564500 |
| O | -2.12295400 | 0.89696500  | 0.40591000  |
| O | -2.56972600 | -1.75719000 | -0.45540300 |
| H | 2.71645500  | -0.33530300 | 1.40602500  |
| H | 2.93082600  | 0.89237900  | 0.13349300  |
| O | 3.62866700  | -1.00188500 | -0.33352700 |
| H | -0.36049200 | -3.31193500 | 0.07749100  |
| C | -3.26070200 | -2.78330100 | 0.08328600  |
| C | -4.49537300 | -3.07486000 | -0.71221100 |
| H | -5.14416900 | -2.19700700 | -0.70326800 |
| H | -5.01254700 | -3.92884900 | -0.28218200 |
| H | -4.22176100 | -3.27861700 | -1.74865900 |
| O | -2.90231800 | -3.36165200 | 1.07378800  |
| C | -2.54885700 | 1.99746000  | -0.24594600 |
| C | -3.55006200 | 2.74564400  | 0.57669300  |
| H | -4.31002000 | 2.06410100  | 0.95928100  |
| H | -4.00259800 | 3.53182300  | -0.02265200 |
| H | -3.02525200 | 3.18329600  | 1.42926400  |
| O | -2.14265300 | 2.32180100  | -1.33048200 |
| C | 0.32312200  | 2.91543400  | 0.19922700  |
| C | 0.69701500  | 4.07362100  | -0.67012700 |
| H | 0.04464400  | 4.06276900  | -1.54619900 |
| H | 0.56563900  | 5.00165000  | -0.11924700 |
| H | 1.72727800  | 3.97086100  | -1.01230100 |

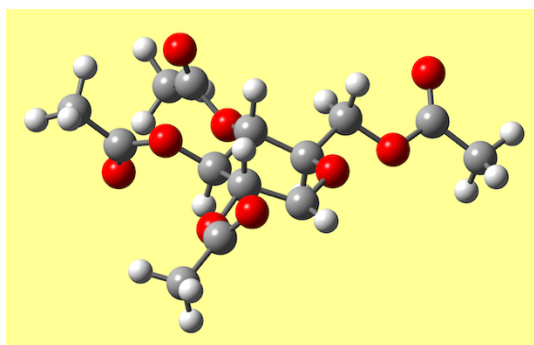

|   |             |             |             |
|---|-------------|-------------|-------------|
| O | -0.19817300 | 2.97812300  | 1.27982000  |
| C | 4.91109200  | -0.85265200 | 0.03858200  |
| C | 5.80861900  | -1.78652900 | -0.71515400 |
| H | 5.74581400  | -1.56493500 | -1.78219300 |
| H | 5.47404600  | -2.81440900 | -0.56660000 |
| H | 6.83213900  | -1.66837400 | -0.36833700 |
| O | 5.25729200  | -0.05723500 | 0.87179800  |

### Tetraacetyl $^4C_1$ $\alpha$ -transition state

$G^\ddagger = -1527.899004$

Glc-C1 – methyl acrylate-C $\beta$ : 2.35345 Å

Charge 0 Multiplicity 2

|   |             |             |             |
|---|-------------|-------------|-------------|
| C | -0.25988400 | 3.12139000  | -0.61102400 |
| C | -1.56545100 | 3.45681800  | -0.49760300 |
| C | -2.60414100 | 2.70037400  | -1.20233800 |
| O | -3.83000600 | 3.17433000  | -0.93173800 |
| O | -2.41917300 | 1.76391600  | -1.95243800 |
| C | -4.91148200 | 2.51182400  | -1.59274700 |
| H | 0.50902200  | 3.75780200  | -0.19038900 |
| H | 0.05598200  | 2.38129600  | -1.34032900 |
| H | -1.89607700 | 4.26273300  | 0.14595300  |
| H | -4.79404400 | 2.57457200  | -2.67531800 |
| H | -4.95859800 | 1.46339500  | -1.29491500 |
| H | -5.81313600 | 3.03252300  | -1.27972100 |
| C | 1.49371800  | -0.07617200 | -0.16679100 |
| C | -0.97157200 | -0.16173800 | 0.08895800  |
| C | 0.15382500  | 1.61568100  | 1.14977000  |
| H | 1.90008600  | 0.59144300  | 1.82279300  |
| H | 0.42635100  | -1.55358100 | 0.99891800  |
| H | 1.42945500  | 0.35394600  | -1.16932600 |
| H | -1.06567500 | 0.38376300  | -0.85562500 |
| C | -2.22076700 | -0.98457600 | 0.27361900  |
| O | 0.14723700  | -1.90116800 | -1.02707100 |
| O | 2.73132600  | -0.77520000 | -0.01686200 |
| O | 2.43489400  | 2.00920000  | 0.42577200  |
| H | -2.42272200 | -1.56908200 | -0.62459400 |
| H | -3.06921800 | -0.32549100 | 0.46782200  |
| O | -2.01372300 | -1.85744800 | 1.38904100  |
| H | 0.08852600  | 2.36042800  | 1.93322600  |
| C | 2.94176700  | 2.84945300  | 1.35316000  |
| C | 3.92982600  | 3.79231600  | 0.73980900  |
| H | 3.43661000  | 4.38194500  | -0.03539700 |
| H | 4.33450200  | 4.44643200  | 1.50791800  |
| H | 4.73019200  | 3.22125700  | 0.26648600  |
| O | 2.61542600  | 2.81394700  | 2.50904300  |
| C | 3.28027900  | -1.35656800 | -1.10245200 |

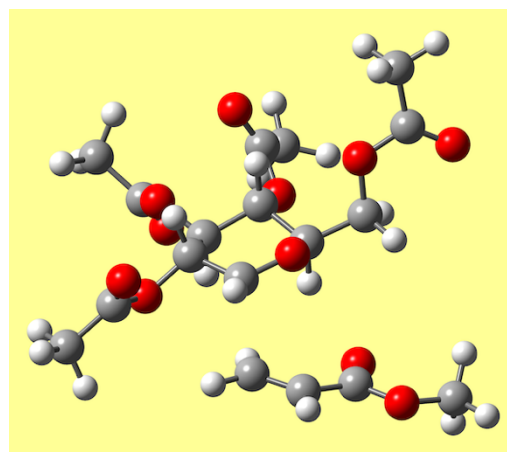

|   |             |             |             |
|---|-------------|-------------|-------------|
| C | 4.52297500  | -2.10320800 | -0.73112000 |
| H | 5.03981100  | -2.42468000 | -1.63202400 |
| H | 5.16968900  | -1.47732800 | -0.11594100 |
| H | 4.22999600  | -2.97365100 | -0.13925700 |
| O | 2.80155400  | -1.28615000 | -2.20324000 |
| C | 0.76441700  | -3.10070300 | -0.96364500 |
| C | 0.54265900  | -3.87655700 | -2.22336800 |
| H | 0.93689300  | -4.88314200 | -2.10755700 |
| H | -0.52007400 | -3.90462600 | -2.46620100 |
| H | 1.06243200  | -3.36197400 | -3.03462700 |
| O | 1.41377900  | -3.45631900 | -0.01684600 |
| C | -3.01146900 | -2.71819900 | 1.65621500  |
| C | -2.67145800 | -3.59864600 | 2.82005400  |
| H | -2.45308300 | -2.98143000 | 3.69305400  |
| H | -3.50347200 | -4.26658000 | 3.02859700  |
| H | -1.77477600 | -4.17544000 | 2.58516300  |
| O | -4.02953700 | -2.74957700 | 1.01718800  |
| C | 0.30483100  | -0.99843400 | 0.06730400  |
| C | 1.51246600  | 1.01752100  | 0.88835800  |
| O | -0.90951500 | 0.78222100  | 1.16144400  |

### Tetraacetyl $^4C_1$ $\beta$ -transition state

$G^\ddagger = -1527.897251$

Glc-C1 – methyl acrylate-C $\beta$ : 2.31548 Å

Charge 0 Multiplicity 2

|   |             |             |             |
|---|-------------|-------------|-------------|
| C | -2.02959900 | -3.02014800 | -0.69637200 |
| C | -3.24085000 | -2.45676100 | -0.50038300 |
| C | -3.55264300 | -1.81033700 | 0.78389400  |
| O | -4.72930100 | -1.16392000 | 0.73246300  |
| O | -2.85886800 | -1.83805100 | 1.77435000  |
| C | -5.13144000 | -0.51212400 | 1.94195500  |
| H | -1.81792000 | -3.59173000 | -1.59219700 |
| H | -1.33710900 | -3.11754000 | 0.13398600  |
| H | -3.99062800 | -2.40489100 | -1.28012500 |
| H | -5.26450300 | -1.24452700 | 2.73968100  |
| H | -4.38542900 | 0.22460000  | 2.23811600  |
| H | -6.07879300 | -0.02824200 | 1.71528800  |
| O | 0.60432200  | -1.96745600 | -1.26092400 |
| C | -0.92476400 | -0.17544300 | -0.67679500 |
| C | 1.54142100  | 0.10124800  | -0.50452700 |
| C | 0.23279000  | 0.82963800  | -0.77163800 |
| C | 1.70973800  | -1.07358600 | -1.46268300 |
| C | -0.60686800 | -1.38364000 | -1.50824600 |
| H | -1.07327600 | -0.44400000 | 0.37521600  |
| H | 1.55172400  | -0.26108600 | 0.52452700  |
| H | 0.24237200  | 1.29003900  | -1.76287300 |
| H | 1.69679000  | -0.71735000 | -2.50063400 |
| C | 2.99685200  | -1.83634900 | -1.24066000 |
| O | 2.62605200  | 1.00108600  | -0.71295000 |
| O | 0.13750200  | 1.84115500  | 0.23022700  |
| O | -2.13246400 | 0.36150000  | -1.21833300 |
| H | 3.83802200  | -1.26154500 | -1.62362400 |
| H | 2.93827300  | -2.79533100 | -1.75557600 |
| O | 3.18281700  | -2.10558700 | 0.15225300  |
| H | -0.95341300 | -1.39689800 | -2.54014800 |
| C | -2.95648100 | 1.03943100  | -0.39253700 |
| C | -4.17752600 | 1.50658800  | -1.11918500 |
| H | -3.88119100 | 2.30546200  | -1.80361000 |
| H | -4.90264300 | 1.88680600  | -0.40313300 |

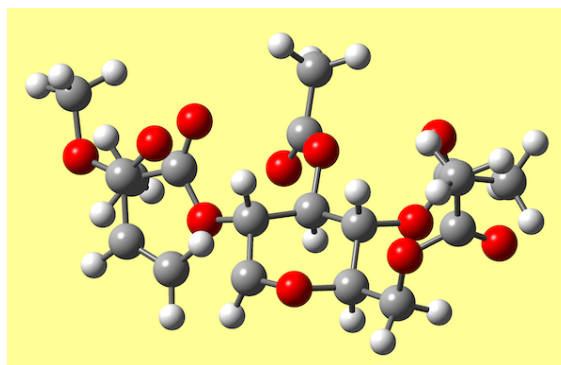

|   |             |             |             |
|---|-------------|-------------|-------------|
| H | -4.60407100 | 0.69297000  | -1.70562800 |
| O | -2.70368700 | 1.24131700  | 0.76607000  |
| C | -0.54139400 | 2.96837900  | -0.06479300 |
| C | -0.60505100 | 3.87434500  | 1.12373500  |
| H | -0.94727100 | 4.85979200  | 0.81683300  |
| H | 0.36768100  | 3.93279200  | 1.61185500  |
| H | -1.31544300 | 3.44069100  | 1.83198900  |
| O | -1.03715400 | 3.17723800  | -1.14047300 |
| C | 3.30636900  | 1.44011700  | 0.37539500  |
| C | 4.42062800  | 2.34965300  | -0.03438600 |
| H | 4.03356100  | 3.15361400  | -0.66188200 |
| H | 4.90423700  | 2.75420700  | 0.85124500  |
| H | 5.13828600  | 1.77209300  | -0.62031000 |
| O | 3.03770600  | 1.11168700  | 1.49794200  |
| C | 4.24852200  | -1.55113800 | 0.76811100  |
| C | 4.23828200  | -1.86092700 | 2.23204500  |
| H | 4.08394600  | -2.92866400 | 2.39008700  |
| H | 3.40527100  | -1.32257000 | 2.68951200  |
| H | 5.17432200  | -1.53553500 | 2.67928200  |
| O | 5.07423700  | -0.88857400 | 0.19619200  |



### Tetraacetyl $B_{2,5}$ $\alpha$ -transition state

$G^\ddagger = -1527.894359$

Glc-C1 – methyl acrylate-C $\beta$ : 2.30397 Å

Charge 0 Multiplicity 2

|   |             |             |             |
|---|-------------|-------------|-------------|
| O | -0.87173200 | 0.18550200  | -1.03639900 |
| C | -0.37214600 | 0.69087100  | 0.20399400  |
| C | 1.12281900  | 0.38224400  | 0.26483500  |
| C | 1.45021400  | -1.03670500 | -0.22339000 |
| C | 0.19268300  | -1.90409800 | -0.34391200 |
| C | -0.85688800 | -1.16645700 | -1.13463800 |
| C | -0.67809000 | 2.17147100  | 0.28721900  |
| O | 0.07323000  | 2.92808200  | -0.67042900 |
| O | 1.50819800  | 0.58987900  | 1.61837600  |
| O | 2.02990500  | -0.89647200 | -1.52257000 |
| O | -0.19236200 | -2.16047200 | 1.02075700  |
| C | -0.74583100 | -3.36423900 | 1.29022200  |
| C | -3.78595200 | -0.86746700 | -0.89728000 |
| C | -3.98552800 | 0.42419500  | -0.23893200 |
| O | -4.83264000 | 1.20885500  | -0.92403200 |
| O | -3.46809500 | 0.77479800  | 0.80238100  |
| C | -5.10171200 | 2.48831000  | -0.34588700 |
| H | -0.89313500 | 0.19779000  | 1.03009900  |
| H | 1.67691100  | 1.06355100  | -0.38172900 |
| H | 2.15960300  | -1.51691700 | 0.45079000  |
| H | 0.42237500  | -2.84956300 | -0.83167900 |
| H | -1.05152000 | -1.49487700 | -2.14767000 |
| H | -5.50492200 | 2.37731100  | 0.66138100  |
| H | -4.19300400 | 3.09121700  | -0.30766500 |
| H | -5.83483500 | 2.95900200  | -0.99649700 |
| H | -2.58012000 | -1.58873400 | 0.66253300  |
| H | -2.83407100 | -2.76819900 | -0.74858900 |
| H | -1.72734900 | 2.33125200  | 0.05034800  |
| H | -0.46365900 | 2.52645600  | 1.29483200  |
| C | -2.93691100 | -1.76752200 | -0.34690400 |
| C | 2.80242000  | 0.92773600  | 1.81369000  |
| C | 2.82656500  | -1.90433000 | -1.94336300 |
| C | 1.19802400  | 3.53475300  | -0.24544200 |
| O | -0.94709100 | -4.19529000 | 0.44685200  |

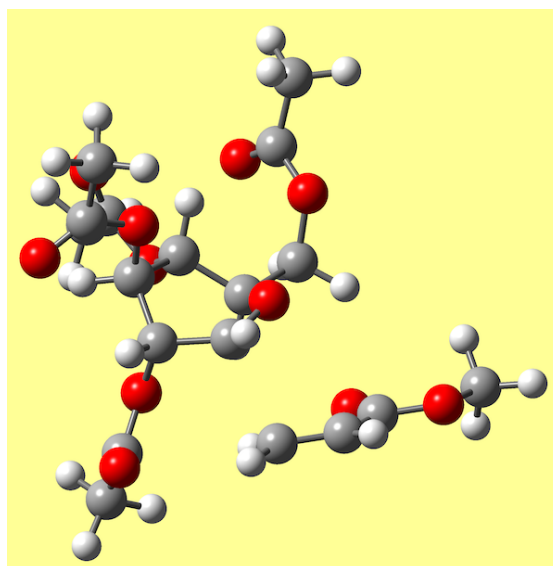

|   |             |             |             |
|---|-------------|-------------|-------------|
| O | 3.62045500  | 0.88424300  | 0.93485800  |
| O | 3.01943800  | -2.89465200 | -1.29141000 |
| O | 1.60458700  | 3.46190400  | 0.88547200  |
| C | 1.86251900  | 4.27646000  | -1.36452400 |
| H | 2.70717700  | 4.84085800  | -0.97758100 |
| H | 1.14496700  | 4.94006700  | -1.84821500 |
| H | 2.20766700  | 3.55481600  | -2.10856500 |
| C | 3.41202800  | -1.60040200 | -3.28673100 |
| H | 2.61165600  | -1.37897700 | -3.99424300 |
| H | 3.99783500  | -2.44973400 | -3.62897900 |
| H | 4.04516400  | -0.71464400 | -3.20704000 |
| C | 3.04189400  | 1.35422200  | 3.22679300  |
| H | 4.11088900  | 1.40743300  | 3.41832800  |
| H | 2.59267900  | 2.34124500  | 3.35974400  |
| C | -1.07297900 | -3.48664600 | 2.74605500  |
| H | -1.42453500 | -4.49364500 | 2.95621500  |
| H | -1.84983200 | -2.76107300 | 2.99793100  |
| H | -0.19076600 | -3.25480300 | 3.34382200  |
| H | 2.55902000  | 0.66403900  | 3.91874500  |
| H | -4.27811700 | -1.02927400 | -1.84798800 |

### Tetraacetyl $B_{2,5}$ $\beta$ -transition state

$G^\ddagger = -1527.892974$

Glc-C1 – methyl acrylate-C $\beta$ : 2.30802 Å

Charge 0 Multiplicity 2

|   |             |             |             |
|---|-------------|-------------|-------------|
| H | -1.53722900 | -2.67129700 | 1.85220400  |
| H | -0.37475500 | -1.22983800 | 1.93707700  |
| H | 0.37886500  | -4.12425700 | 1.16472100  |
| H | 3.95709000  | -2.14827000 | -0.35037900 |
| H | 4.45738600  | -2.43334900 | 1.33748500  |
| H | 4.59766200  | -3.74708800 | 0.13382400  |
| C | -0.55667000 | -2.25871600 | 1.64220500  |
| O | 2.12658200  | -1.33376600 | 1.43903400  |
| C | 1.82580200  | -2.48364000 | 1.20024300  |
| O | 2.70514400  | -3.38688200 | 0.73628900  |
| C | 0.49487600  | -3.06774500 | 1.37218600  |
| C | 4.01255900  | -2.88660800 | 0.45018100  |
| O | -0.21395700 | -1.40395700 | -1.23823300 |
| C | 0.05912300  | -0.03833800 | -1.57837300 |
| C | -0.01104500 | 0.79697600  | -0.30365800 |
| C | -1.43947000 | 0.80152800  | 0.22346500  |
| C | -2.19924600 | -0.48991000 | -0.12509200 |
| C | -1.29449600 | -1.62945900 | -0.45222000 |
| H | -0.69926500 | 0.29902200  | -2.29554800 |
| H | 0.67977100  | 0.38209600  | 0.43587300  |
| H | -1.98586000 | 1.63363600  | -0.22317500 |
| H | -2.86000300 | -0.77597000 | 0.69302000  |
| H | -1.72486900 | -2.60977000 | -0.60997400 |
| O | -3.02218100 | -0.14783200 | -1.27442400 |
| O | -1.35803000 | 0.99409600  | 1.63693800  |
| O | 0.35570600  | 2.13749800  | -0.63262600 |
| C | 1.40476500  | 0.02701600  | -2.26794100 |
| H | 1.47892800  | -0.79243300 | -2.98350300 |
| H | 1.50258900  | 0.97849900  | -2.78677400 |
| O | 2.46636900  | -0.12370700 | -1.32267400 |
| C | -4.09677500 | -0.93431200 | -1.49106300 |
| C | 1.26767700  | 2.77138400  | 0.14511700  |
| C | -2.48693500 | 1.41454500  | 2.25157600  |
| C | 3.31183600  | 0.91391600  | -1.14634800 |

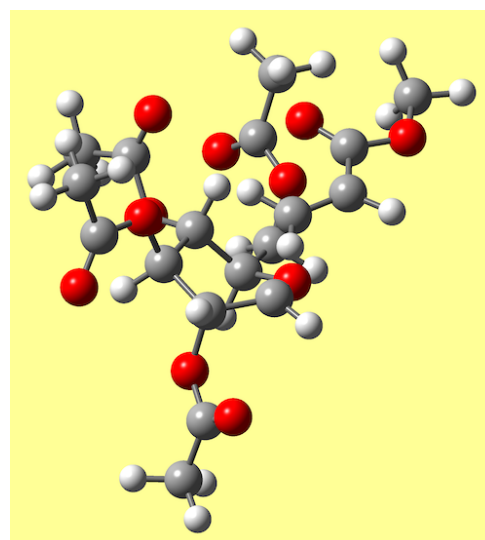

|   |             |             |             |
|---|-------------|-------------|-------------|
| O | -4.36178600 | -1.88042900 | -0.79836300 |
| O | 1.80352700  | 2.25532200  | 1.08608600  |
| O | -3.51357600 | 1.60053000  | 1.65541900  |
| O | 3.25486100  | 1.92968000  | -1.79132500 |
| C | 4.31373200  | 0.62383400  | -0.07340500 |
| H | 3.82521500  | 0.10268100  | 0.74942900  |
| H | 4.76189700  | 1.55919100  | 0.25460800  |
| H | 5.09303400  | -0.02182300 | -0.48797800 |
| C | -2.26644600 | 1.58891300  | 3.72106500  |
| H | -3.15776500 | 2.01367600  | 4.17596000  |
| H | -1.40319900 | 2.23377900  | 3.89020300  |
| H | -2.04837600 | 0.61489600  | 4.16491400  |
| C | 1.49040400  | 4.16787200  | -0.34357200 |
| H | 2.26106200  | 4.64403900  | 0.25765500  |
| H | 0.55655200  | 4.72903400  | -0.27342800 |
| C | -4.88031900 | -0.46313900 | -2.67740200 |
| H | -4.23470100 | -0.44702800 | -3.55711000 |
| H | -5.22931300 | 0.55529500  | -2.49760600 |
| H | -5.72576100 | -1.12653200 | -2.84183500 |
| H | 1.79352500  | 4.13266100  | -1.39041100 |

**Tetraacetyl  $\alpha$ -C-glycoside ( ${}^4C_1$  conformation)**

G = -1527.944765

Charge 0 Multiplicity 2

|   |             |             |             |
|---|-------------|-------------|-------------|
| C | -0.50940100 | -1.04008500 | 0.08970900  |
| C | 0.86303500  | -0.37817200 | 0.01738100  |
| C | 0.72321900  | 1.09871000  | -0.32427600 |
| C | -0.24764100 | 1.75866400  | 0.63996800  |
| C | -1.57503300 | 0.99282500  | 0.75803400  |
| O | -1.30219100 | -0.36712400 | 1.05735000  |
| C | -2.49379300 | 1.16003600  | -0.47138500 |
| C | -3.75531200 | 0.40921900  | -0.26494900 |
| C | -3.95763300 | -0.89655900 | -0.85849100 |
| O | -0.45243600 | 3.08820800  | 0.15929400  |
| O | 1.97431800  | 1.76824200  | -0.13503700 |
| O | 1.58631400  | -1.06356000 | -1.00392700 |
| C | -0.42253000 | -2.49999600 | 0.48769500  |
| O | 0.39968800  | -2.65798900 | 1.65212000  |
| O | -5.12922200 | -1.44280900 | -0.49382200 |
| O | -3.17413400 | -1.45317200 | -1.60477900 |
| C | -5.39830500 | -2.73966200 | -1.03315100 |
| H | -0.98790400 | -1.00494800 | -0.89462600 |
| H | 1.38216300  | -0.47429700 | 0.97368900  |
| H | 0.39639700  | 1.21477600  | -1.36040900 |
| H | 0.21177200  | 1.80002300  | 1.63081000  |
| H | -2.10352000 | 1.37265500  | 1.63340200  |
| H | -1.99523800 | 0.82623400  | -1.38413800 |
| H | -2.70965600 | 2.22685400  | -0.57483800 |
| H | -4.51623800 | 0.78596500  | 0.40701400  |
| H | -1.41797500 | -2.85615800 | 0.75161800  |
| H | -0.01934400 | -3.09013200 | -0.33286600 |
| H | -6.37381600 | -3.02412300 | -0.64679300 |
| H | -5.41795200 | -2.70468400 | -2.12325400 |
| H | -4.64000200 | -3.45347700 | -0.70764800 |
| C | 1.61340900  | -3.22219900 | 1.49851000  |
| O | 2.01097100  | -3.68086500 | 0.45894300  |
| C | 2.39623600  | -3.16990100 | 2.77475500  |
| H | 2.77762700  | -2.15269700 | 2.89778800  |
| H | 1.75877700  | -3.40036700 | 3.62761100  |

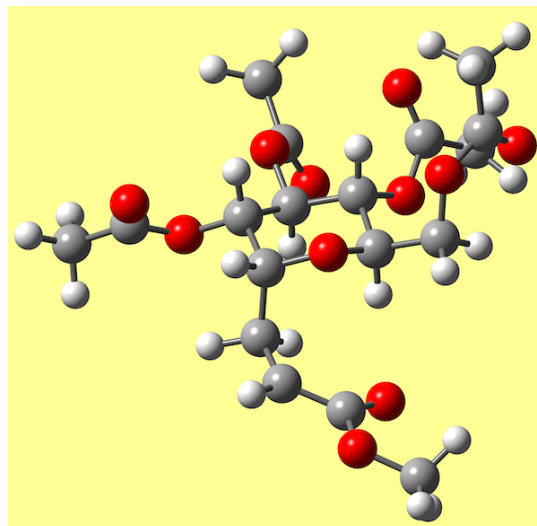

|   |             |             |             |
|---|-------------|-------------|-------------|
| H | 3.23394700  | -3.86085600 | 2.71632900  |
| C | 2.91125400  | -1.25203700 | -0.83303500 |
| O | 3.51872500  | -0.83259000 | 0.11718800  |
| C | 2.83013700  | 1.84122300  | -1.17331700 |
| O | 2.57464400  | 1.42970400  | -2.27391300 |
| C | -0.87840700 | 4.00503000  | 1.05402000  |
| O | -1.11462700 | 3.73574700  | 2.20105300  |
| C | 3.49132700  | -2.00972900 | -1.98394000 |
| H | 3.43912700  | -1.37887500 | -2.87436600 |
| H | 4.52599800  | -2.26480600 | -1.76819800 |
| H | 2.90253200  | -2.90913400 | -2.16408800 |
| C | 4.12106600  | 2.47105000  | -0.75109800 |
| H | 3.93022600  | 3.38121000  | -0.18236700 |
| H | 4.64195300  | 1.76558900  | -0.09936700 |
| H | 4.72896000  | 2.68368400  | -1.62713800 |
| C | -1.00781200 | 5.35439400  | 0.41816600  |
| H | -0.04123500 | 5.65752100  | 0.01227400  |
| H | -1.71593300 | 5.29827100  | -0.41077900 |
| H | -1.34996700 | 6.07457500  | 1.15701300  |

**Tetraacetyl  $\beta$ -C-glycoside ( ${}^4C_1$  conformation)**

G = -1527.948939

Charge 0 Multiplicity 2

|   |             |             |             |
|---|-------------|-------------|-------------|
| C | 1.27456500  | -1.32069700 | -1.43123200 |
| C | 1.46326000  | -0.11285900 | -0.51058400 |
| C | 0.36929600  | 0.92587600  | -0.73261000 |
| C | -0.98514300 | 0.24220800  | -0.66380000 |
| C | -1.03487800 | -0.93104900 | -1.64239300 |
| O | -0.02705800 | -1.85397300 | -1.25867200 |
| C | -2.38564600 | -1.64976400 | -1.64683200 |
| C | -2.88057800 | -1.97164500 | -0.28505800 |
| C | -4.06706100 | -1.31111000 | 0.22906500  |
| O | -2.00394100 | 1.17710600  | -1.00840600 |
| O | 0.37903300  | 1.89383400  | 0.32036200  |
| O | 2.74899100  | 0.42331100  | -0.81826300 |
| C | 2.28972600  | -2.41174500 | -1.14876100 |
| O | 2.34121200  | -2.70060500 | 0.25372400  |
| O | -4.30092400 | -1.60931300 | 1.51416200  |
| O | -4.77282600 | -0.56006300 | -0.41741700 |
| C | -5.39053700 | -0.90358700 | 2.11431600  |
| H | 1.40685700  | -1.00089300 | -2.47490100 |
| H | 1.43142700  | -0.42991000 | 0.53409900  |
| H | 0.50630000  | 1.42559700  | -1.69517400 |
| H | -1.15017600 | -0.12044700 | 0.35311400  |
| H | -0.82958600 | -0.56776500 | -2.65894000 |
| H | -2.34271500 | -2.65063200 | 0.36408400  |
| H | 1.97735300  | -3.32724200 | -1.65016300 |
| H | 3.27379200  | -2.10876500 | -1.50090300 |
| H | -5.42528600 | -1.23707100 | 3.14850400  |
| H | -5.20839000 | 0.17095600  | 2.06644100  |
| H | -6.32745100 | -1.14015300 | 1.60817300  |
| H | -3.11470000 | -1.01870800 | -2.15642000 |
| H | -2.25122900 | -2.56561000 | -2.23185400 |
| C | 3.43048300  | -2.30236200 | 0.94203500  |
| C | 3.48348400  | 0.93397400  | 0.19297700  |
| C | 1.15168800  | 2.98996400  | 0.18345800  |
| C | -2.84425100 | 1.59585100  | -0.03027600 |
| O | 4.39576700  | -1.79895900 | 0.42925100  |

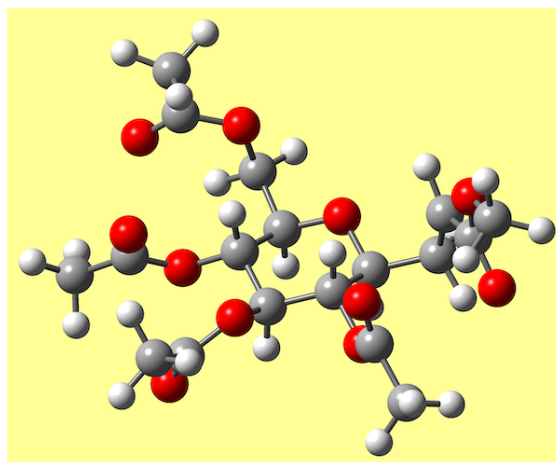

|   |             |             |             |
|---|-------------|-------------|-------------|
| O | 3.08821600  | 0.99276300  | 1.32751200  |
| O | 1.78998300  | 3.23093900  | -0.80679000 |
| O | -2.76213800 | 1.23569700  | 1.11238500  |
| C | -3.86905900 | 2.53354700  | -0.58562000 |
| H | -4.48383900 | 2.92143100  | 0.22304900  |
| H | -4.48994800 | 1.98236800  | -1.29405700 |
| H | -3.37817800 | 3.34901100  | -1.11858300 |
| C | 1.11484000  | 3.82021300  | 1.42826000  |
| H | 0.09069800  | 3.92301000  | 1.78694500  |
| H | 1.55884000  | 4.79361000  | 1.23398200  |
| H | 1.69214500  | 3.29638200  | 2.19418800  |
| C | 4.80660600  | 1.41833900  | -0.30601400 |
| H | 5.30928300  | 0.61139500  | -0.84007800 |
| H | 5.41134400  | 1.75593700  | 0.53204000  |
| H | 4.63679600  | 2.24101900  | -1.00392700 |
| C | 3.25554700  | -2.54346500 | 2.40961000  |
| H | 2.80153800  | -3.51782700 | 2.58723600  |
| H | 2.58230600  | -1.77664800 | 2.80212600  |
| H | 4.21825100  | -2.46507700 | 2.90900000  |



## 7. References

- 1 G. Guiochon, A. Moysan and C. Holley, *J. Liq. Chromatogr.*, 1988, **11**, 2457–2570.
- 2 Q. Chen and F. Kong, *Carbohydr. Res.*, 1995, **272**, 149–157.
- 3 L. Adak, S. Kawamura, G. Toma, T. Takenaka, K. Isozaki, H. Takaya, A. Orita, H. C. Li, T. K. M. Shing and M. Nakamura, *J. Am. Chem. Soc.*, 2017, **139**, 10693–10701.
- 4 H.-G. Korth, R. Sustmann, J. Dupuis and B. Giese, *J. Chem. Soc. Perkin Trans. 2*, 1986, 1453–1459.

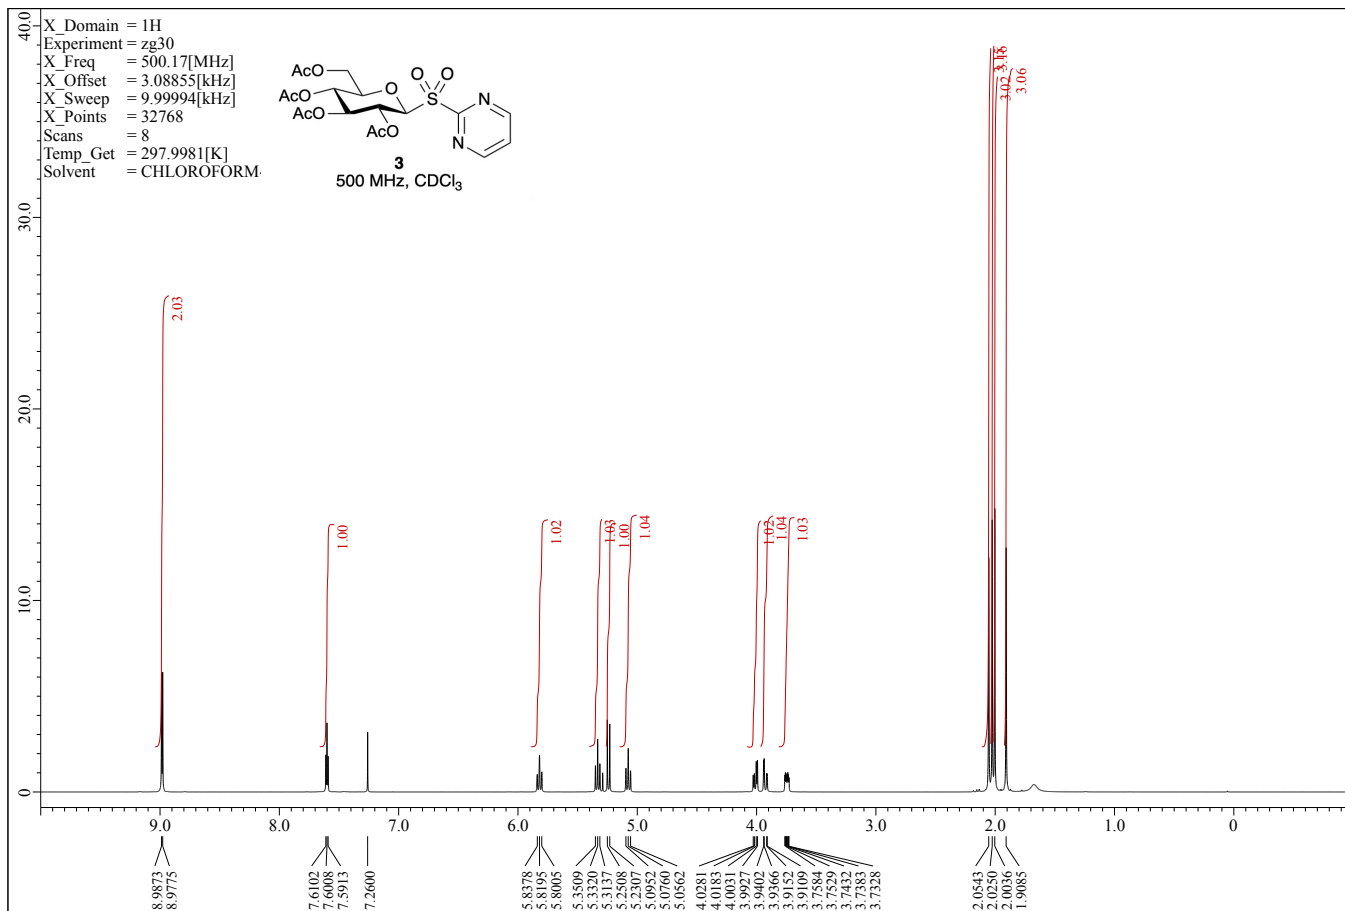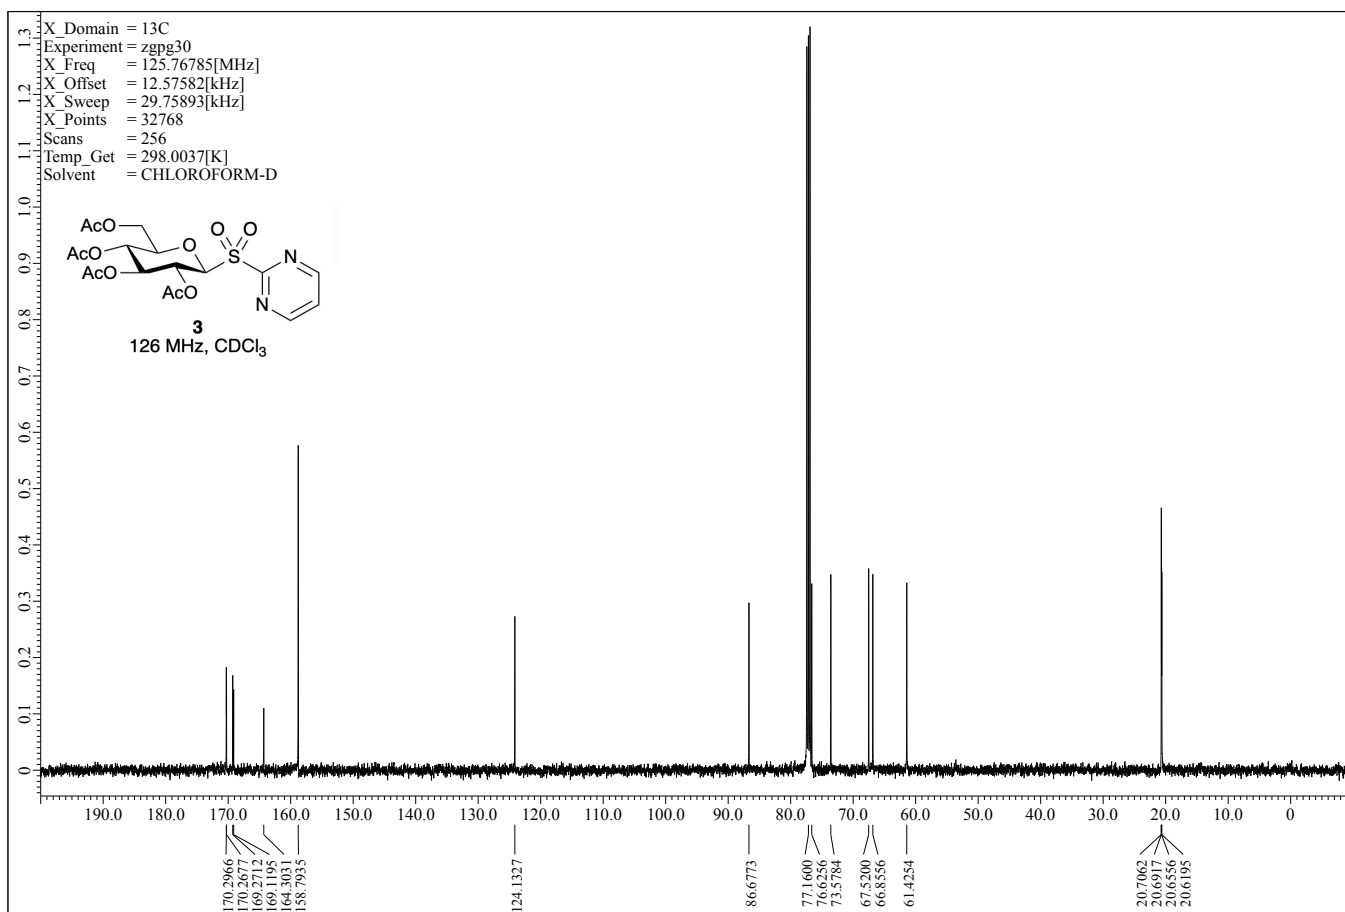

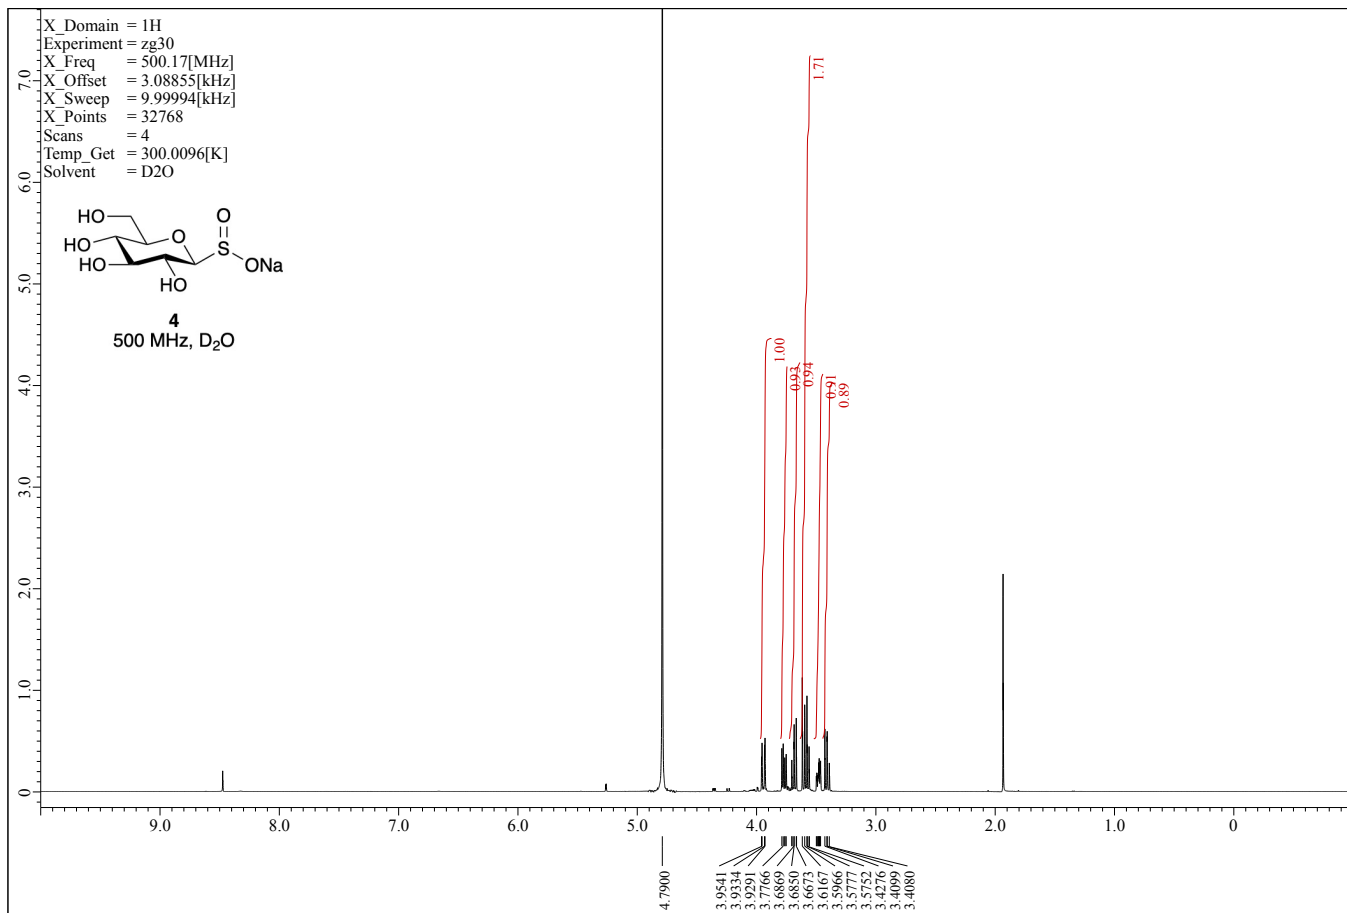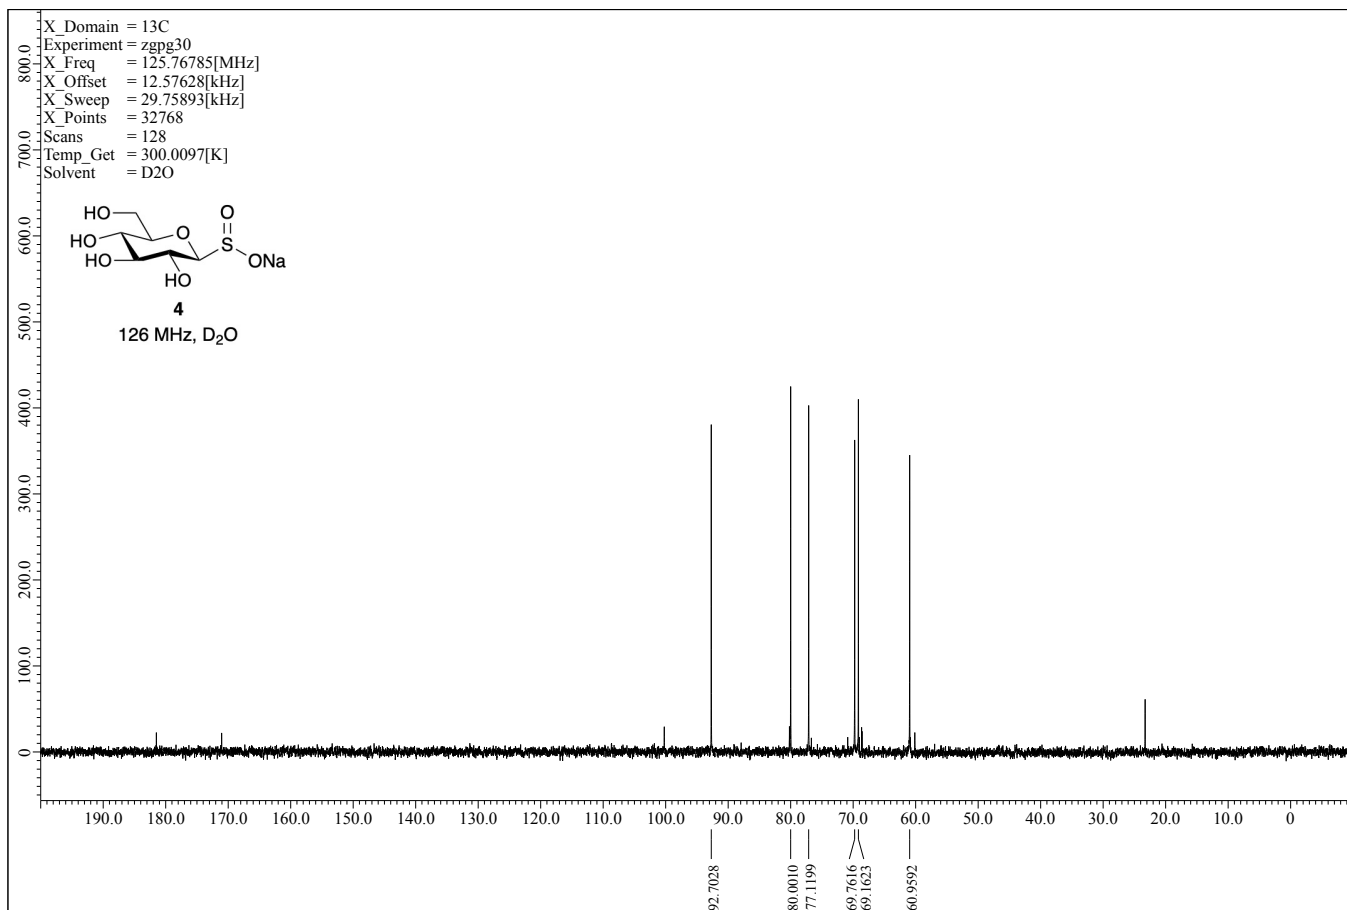

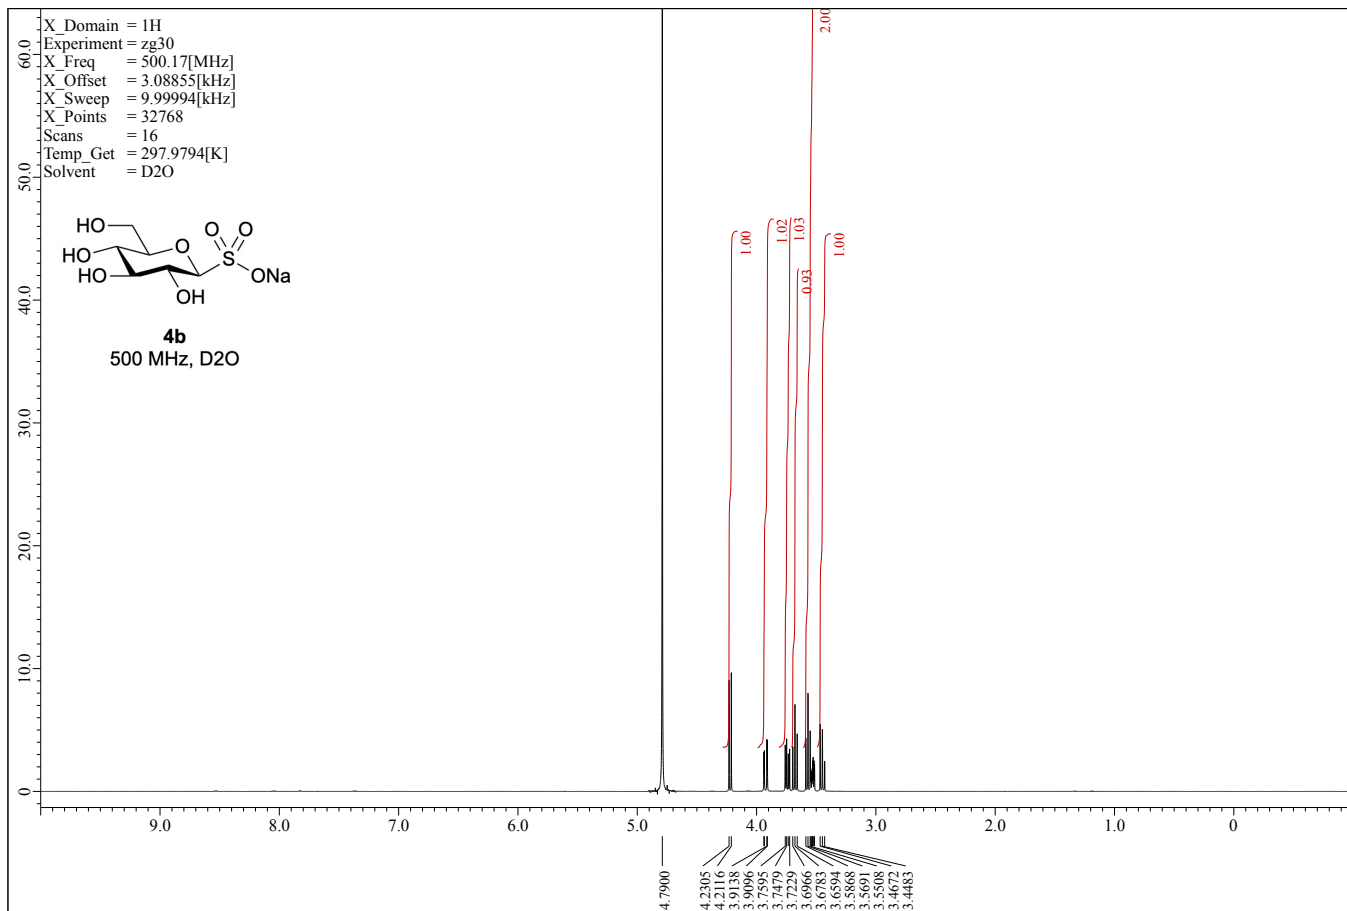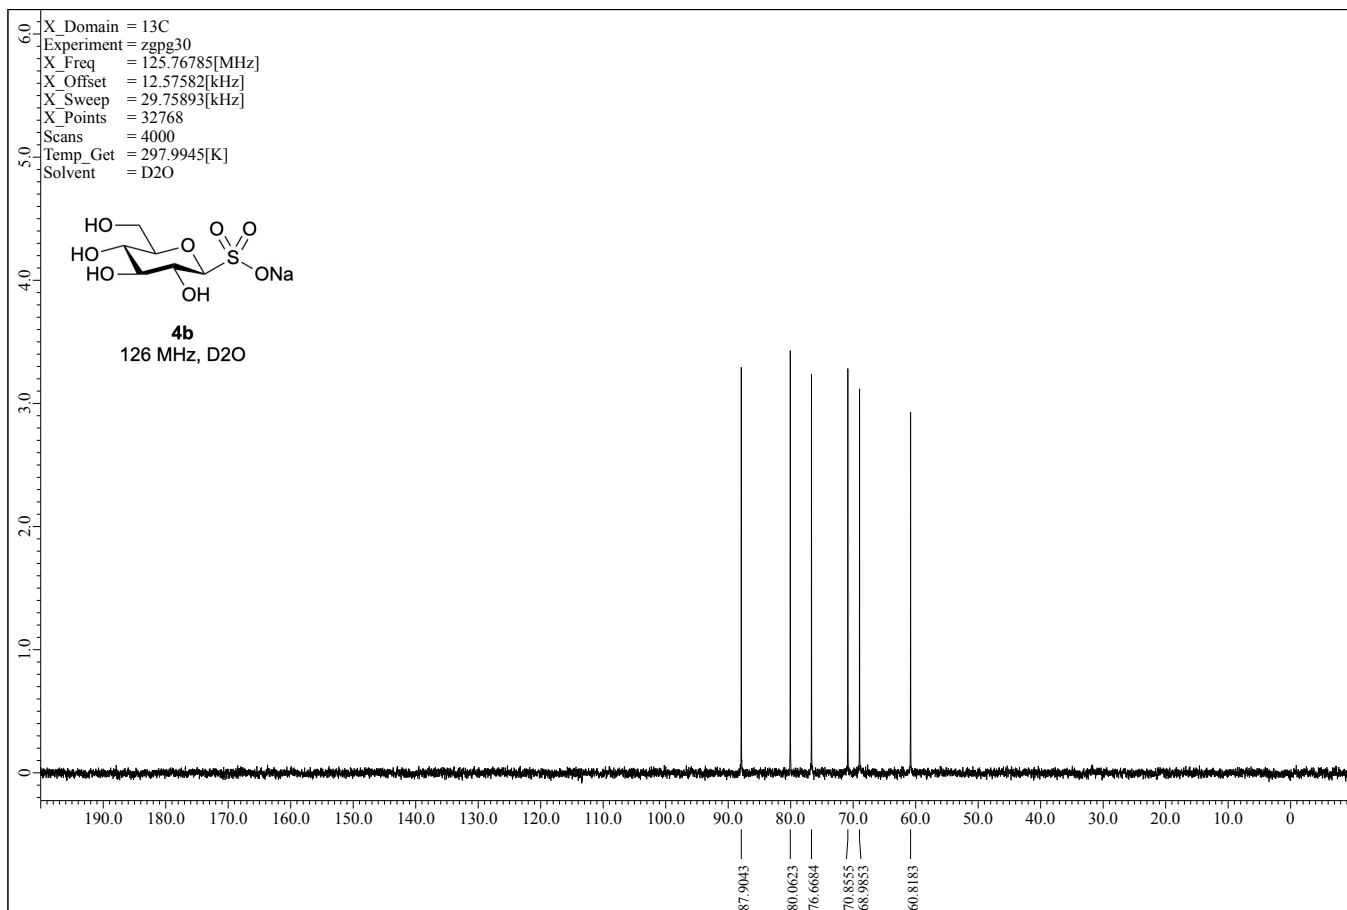

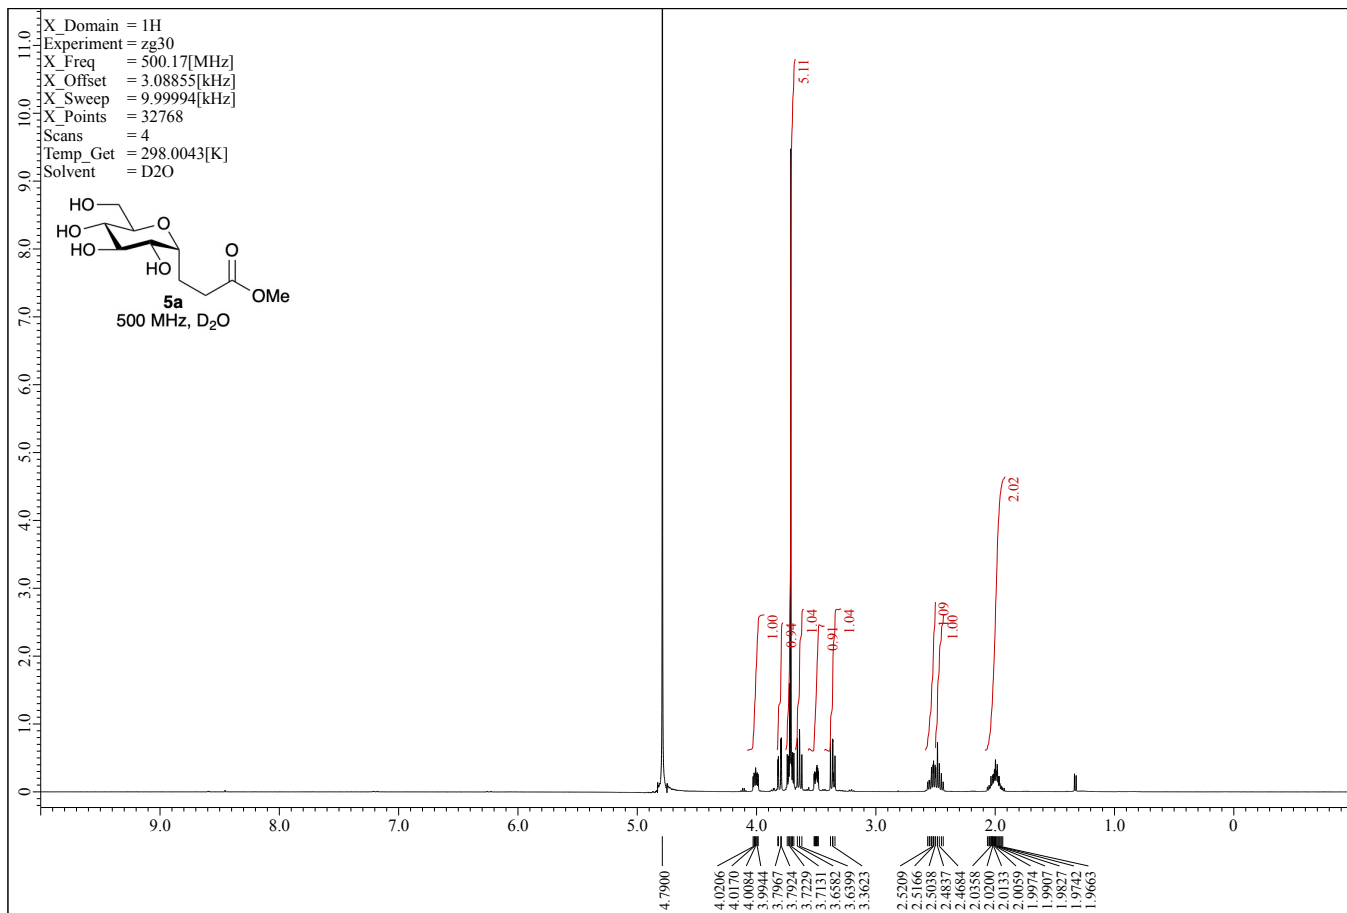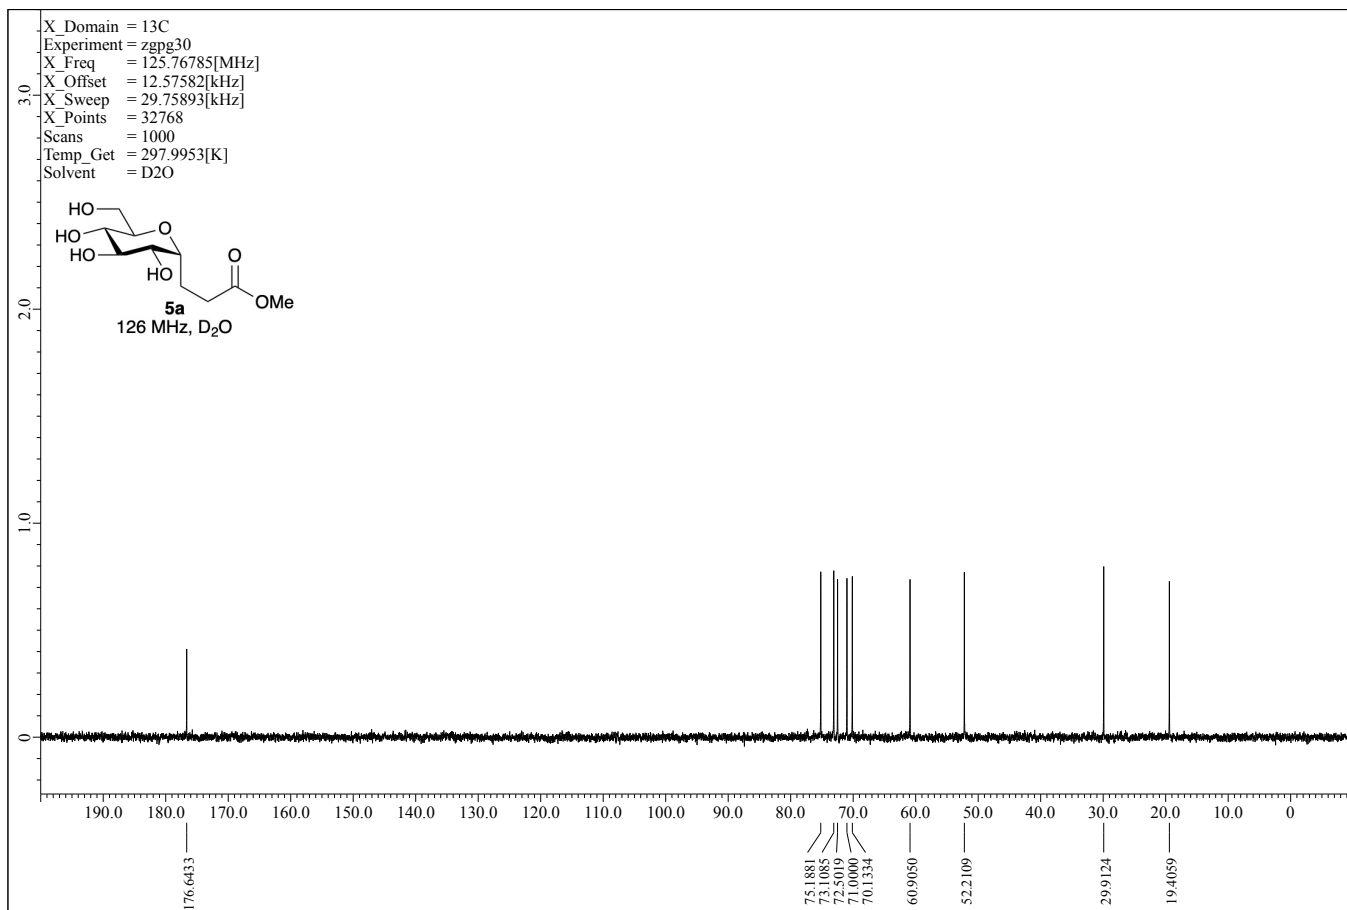

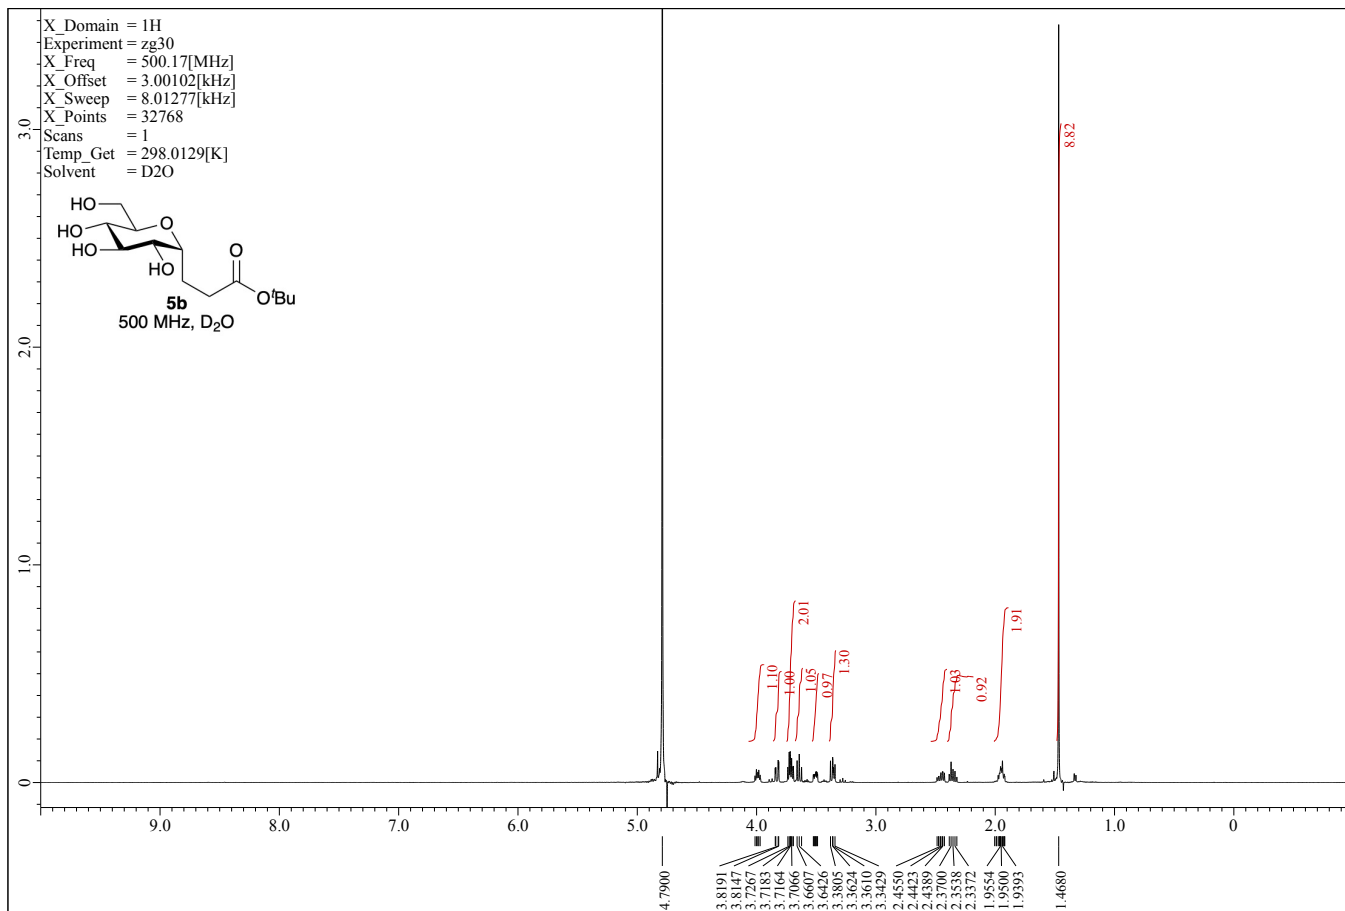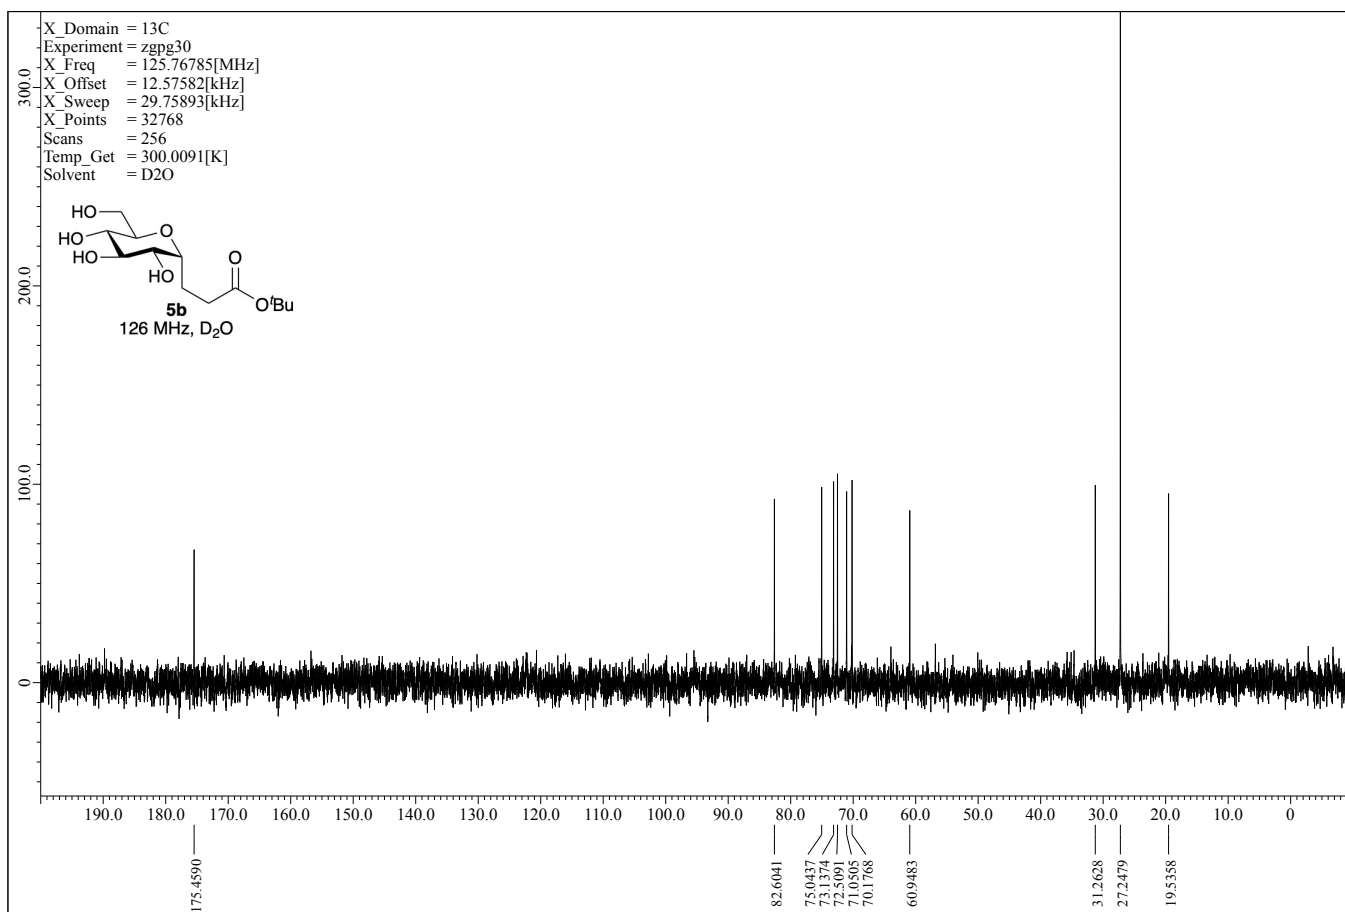

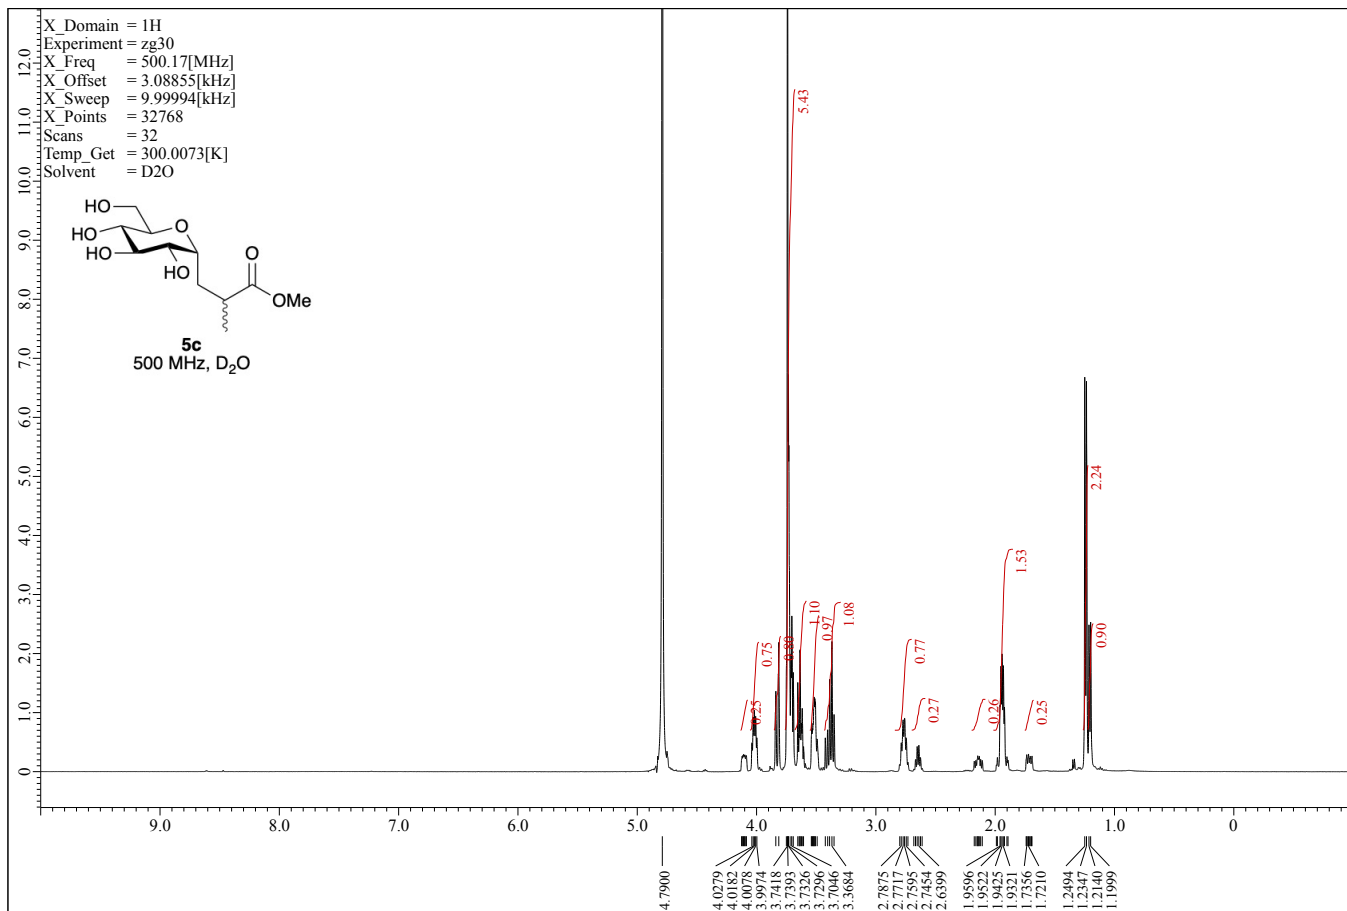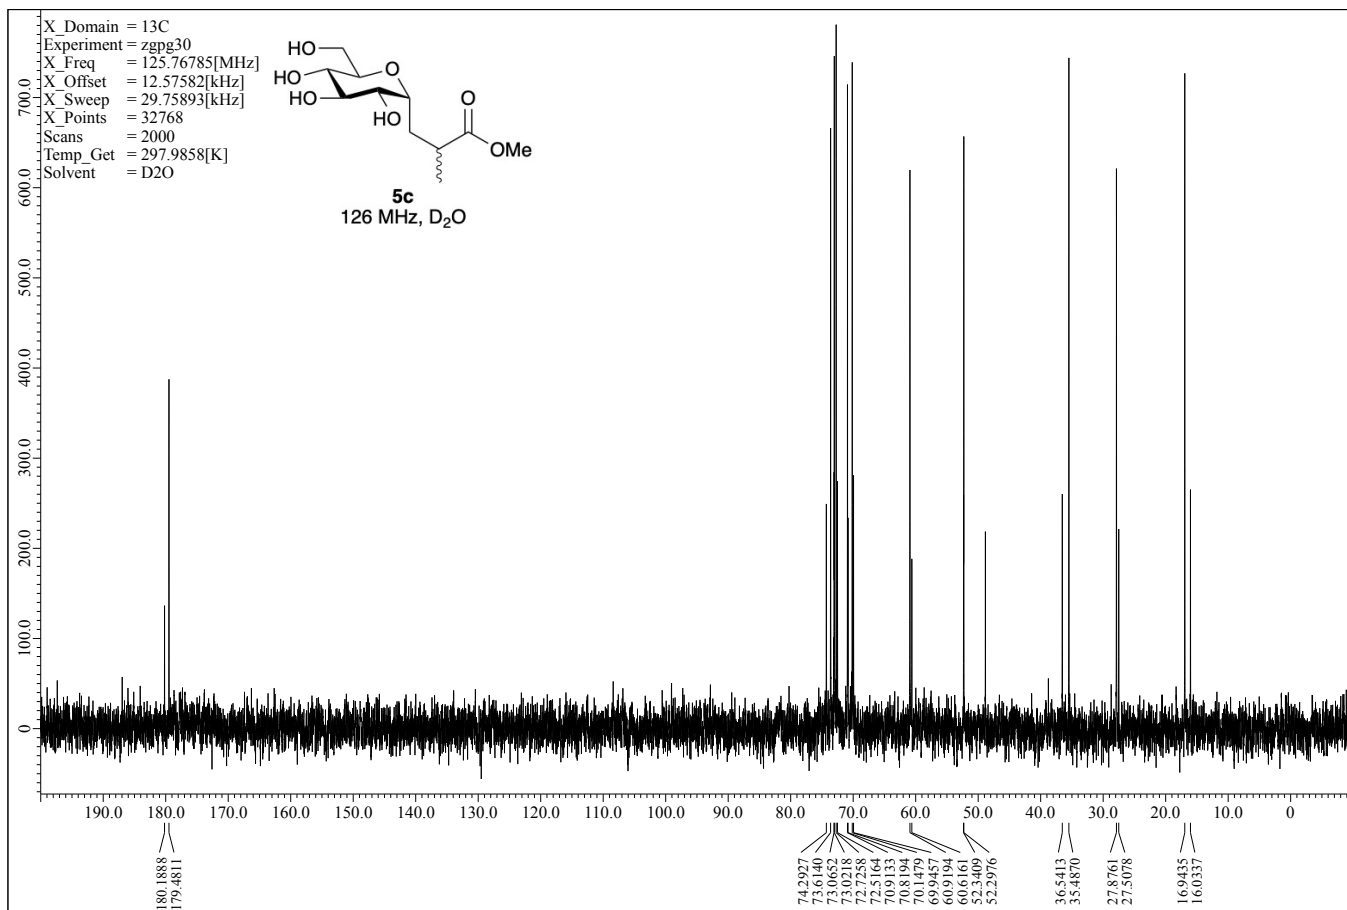

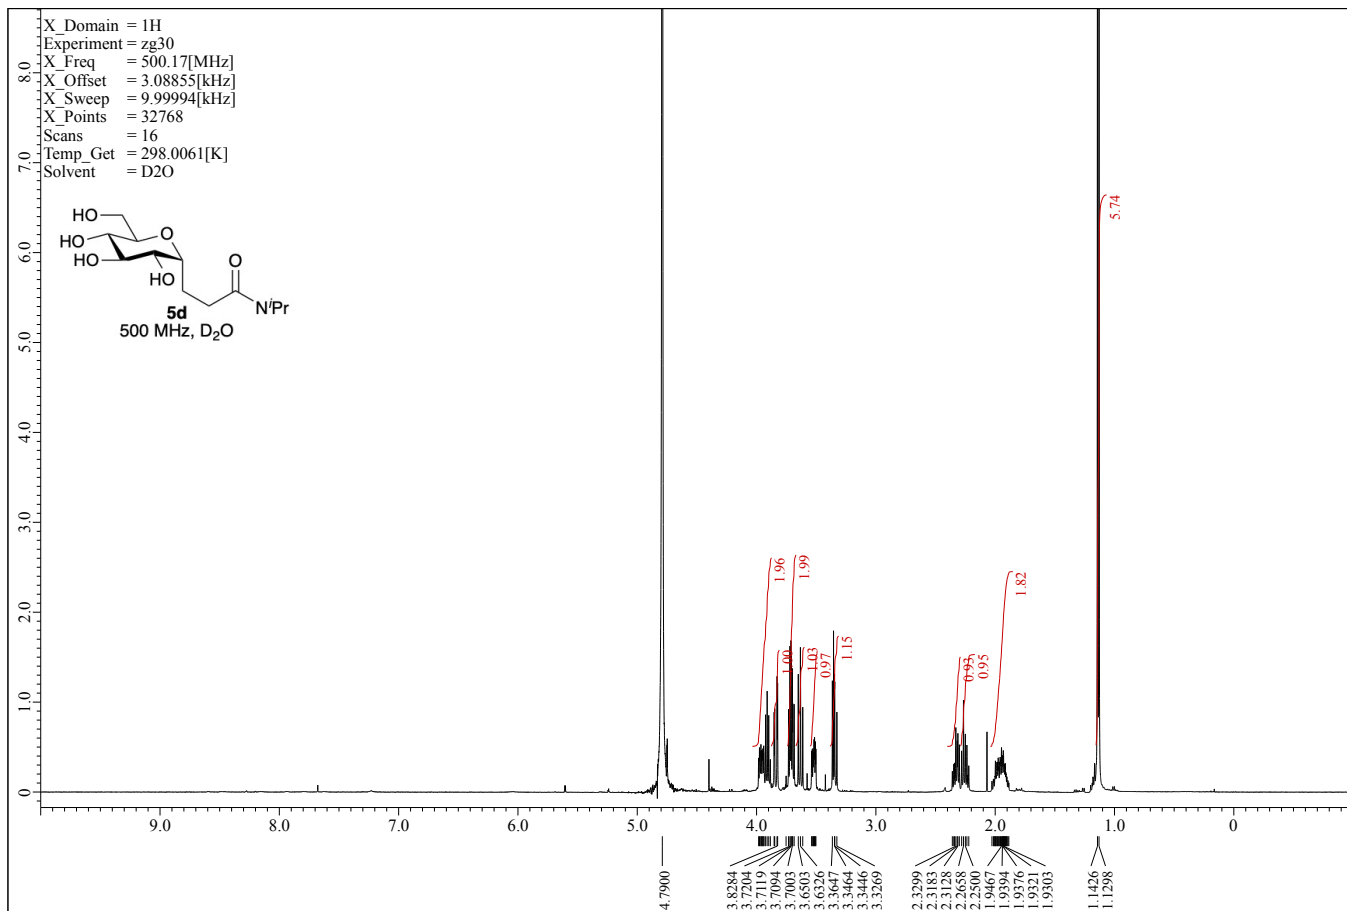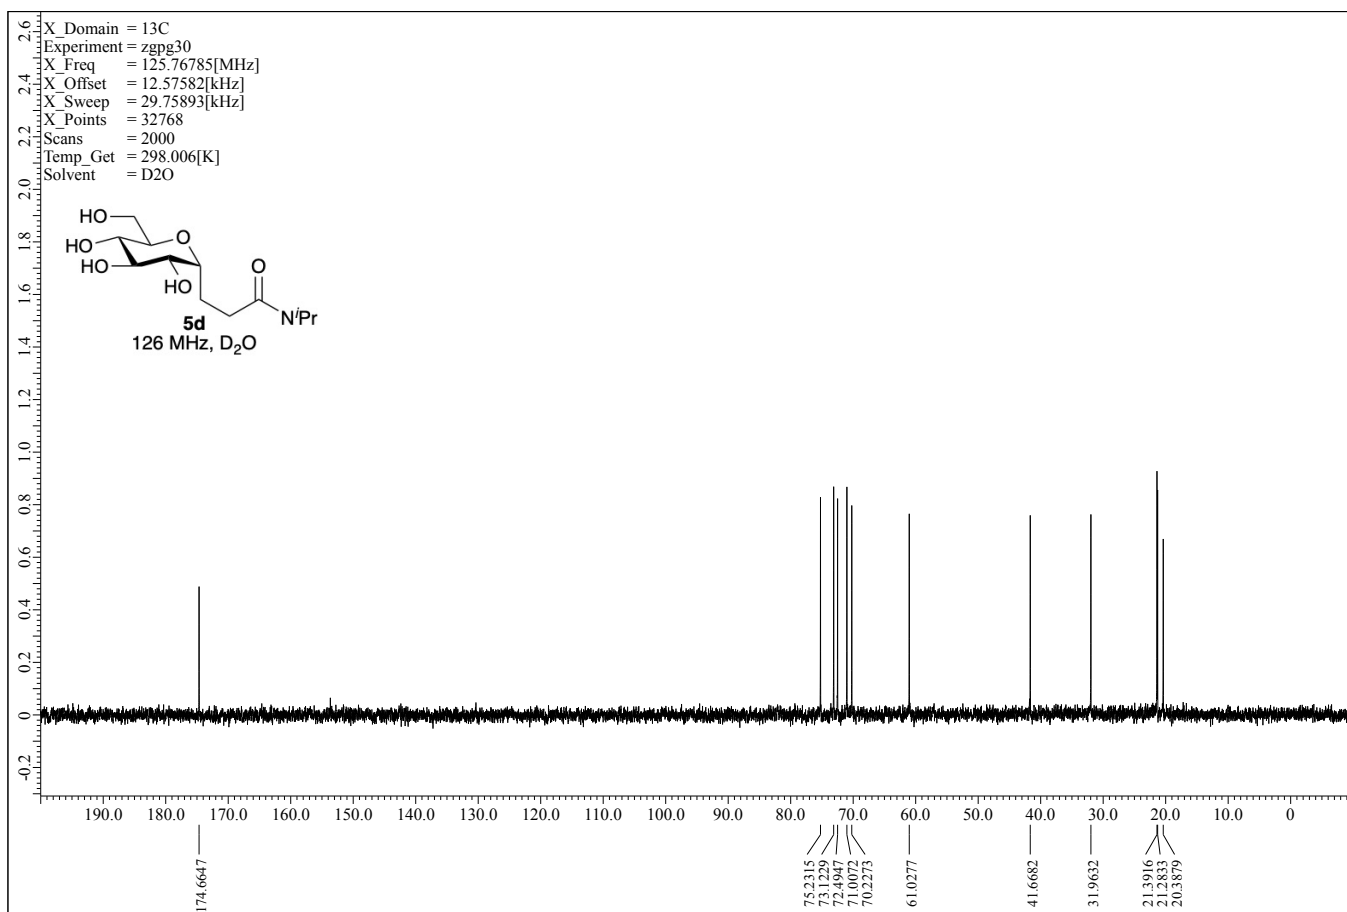



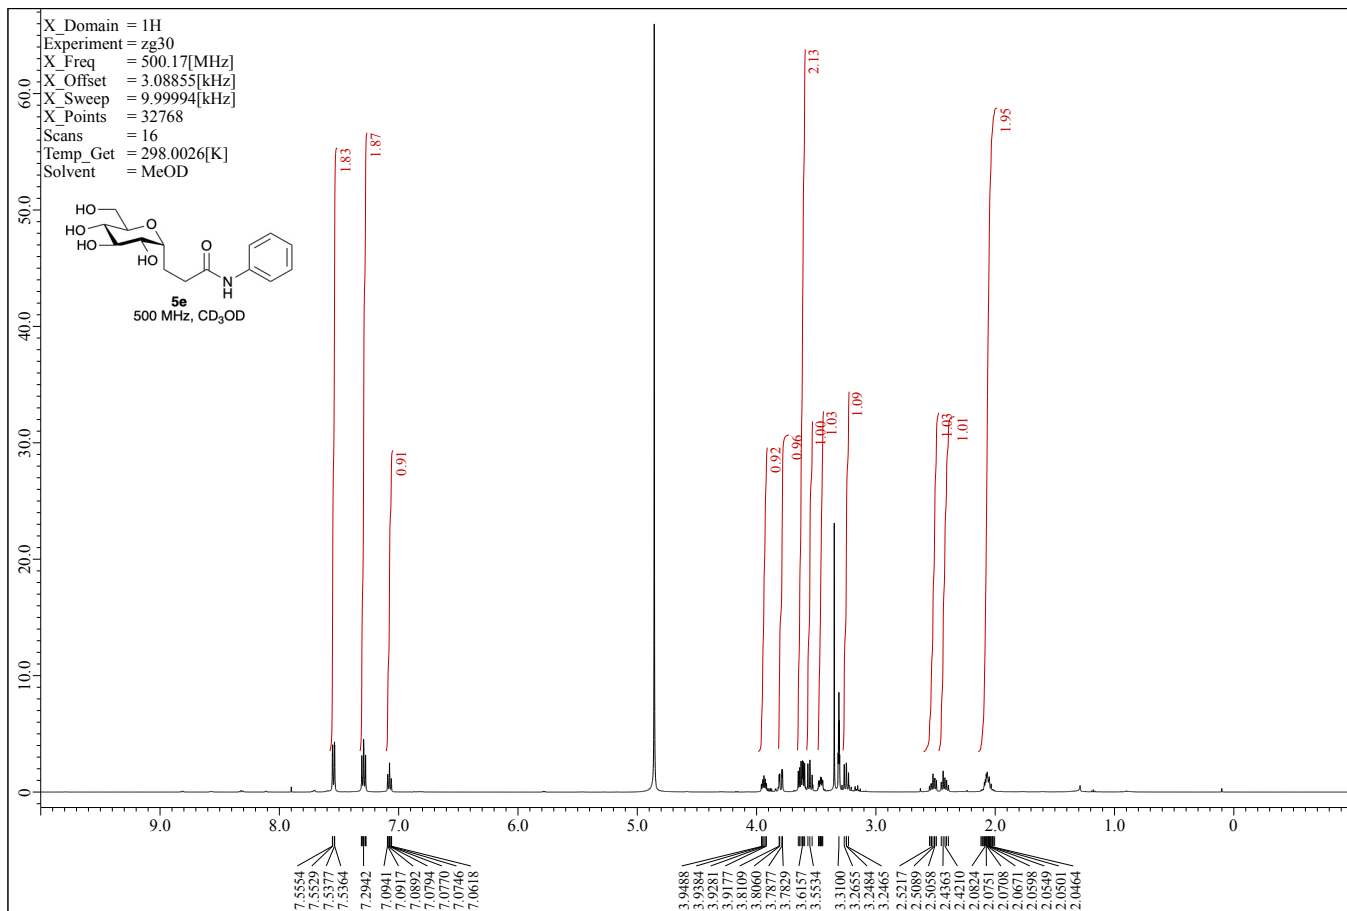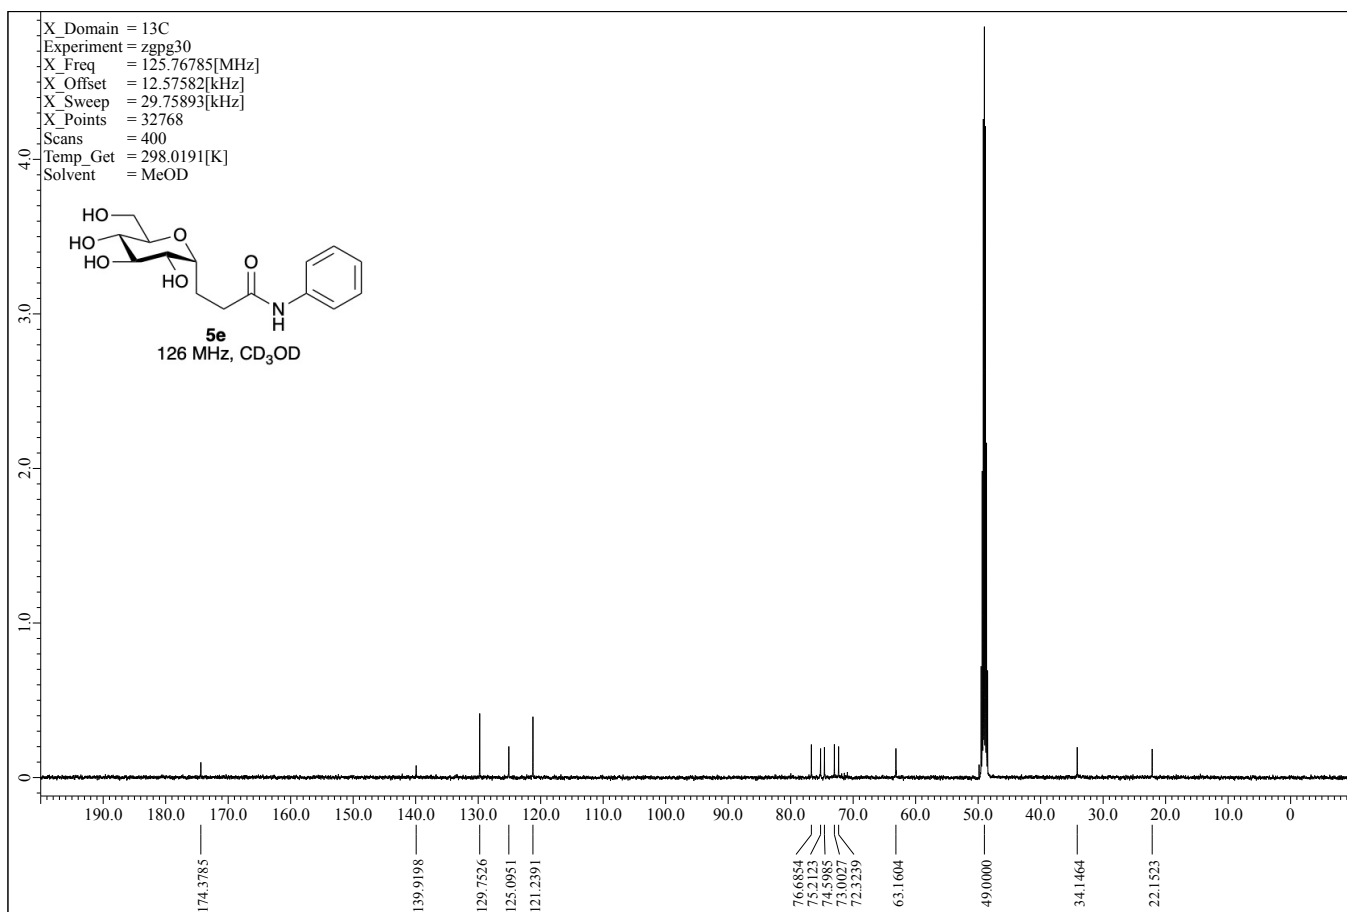

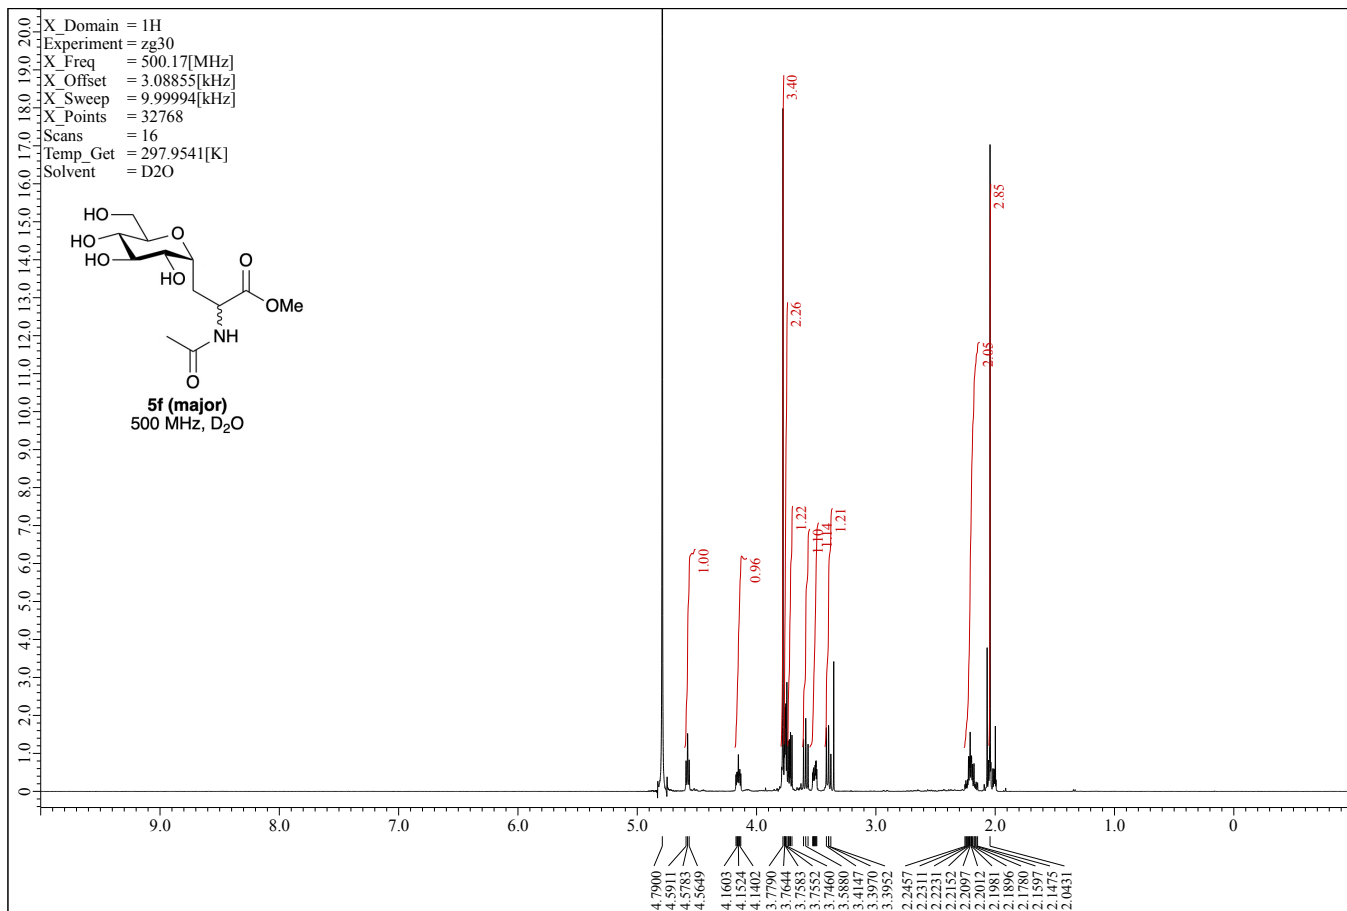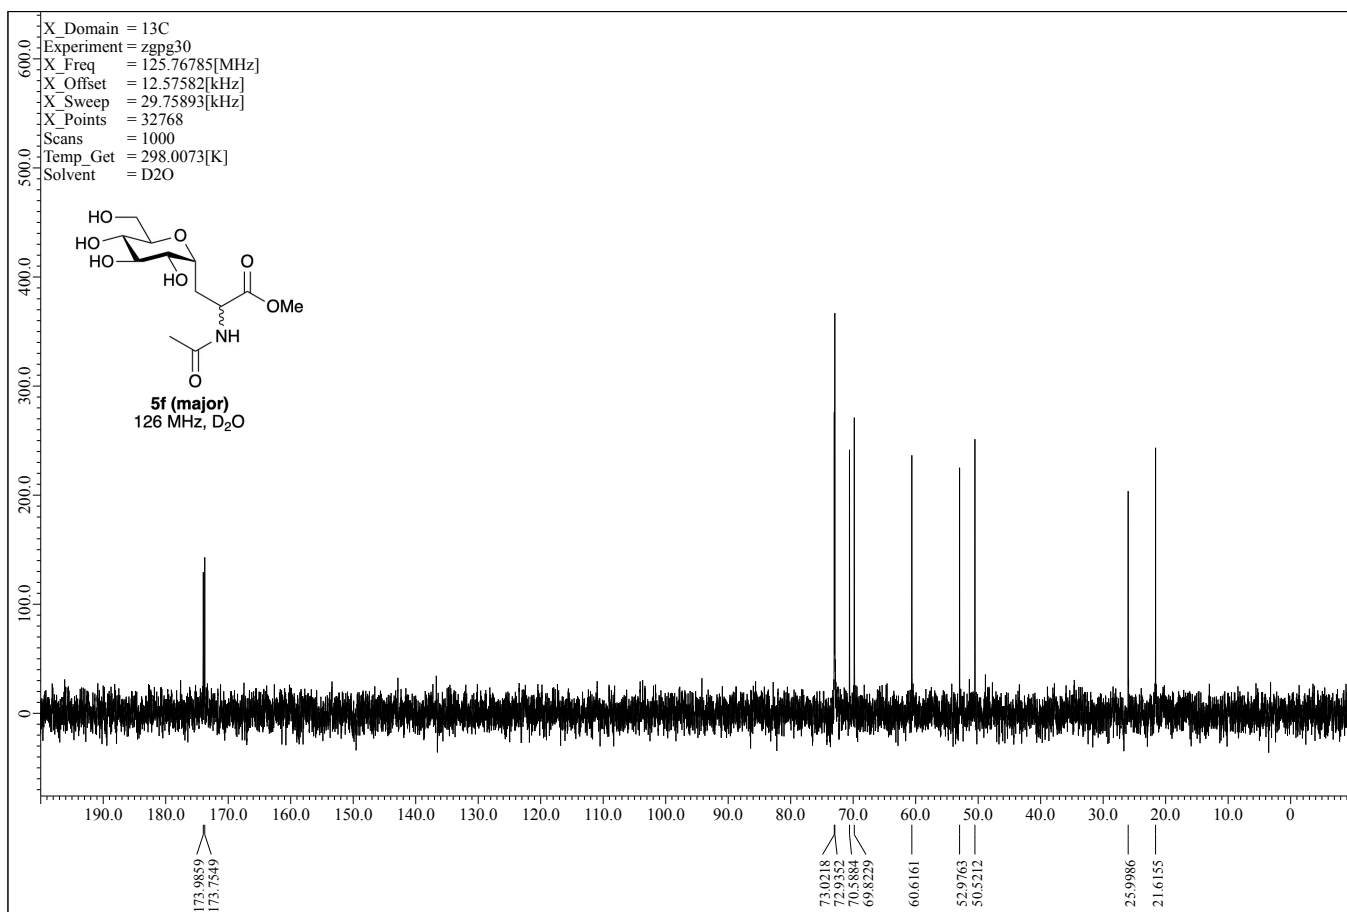

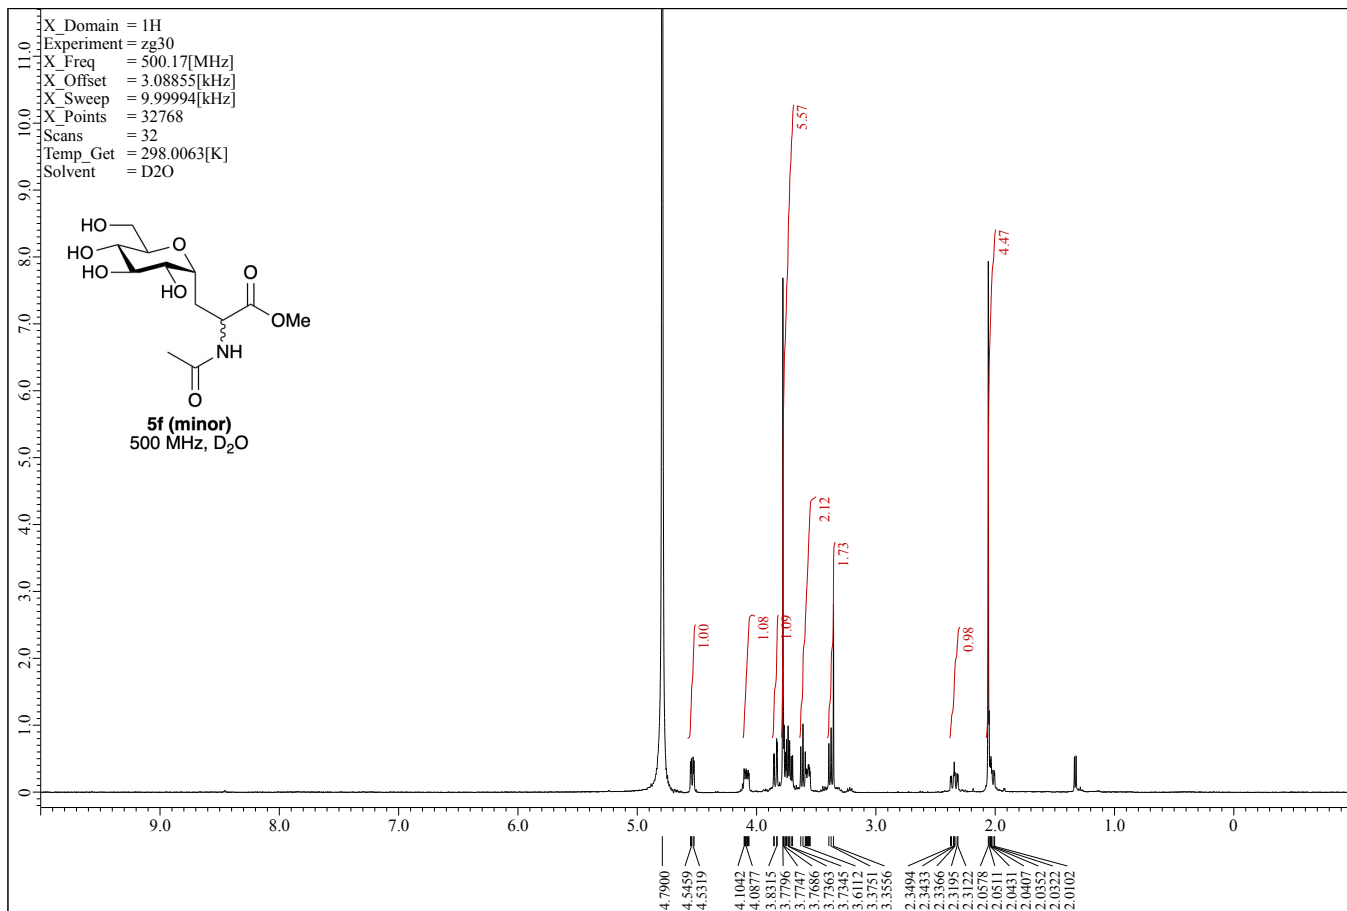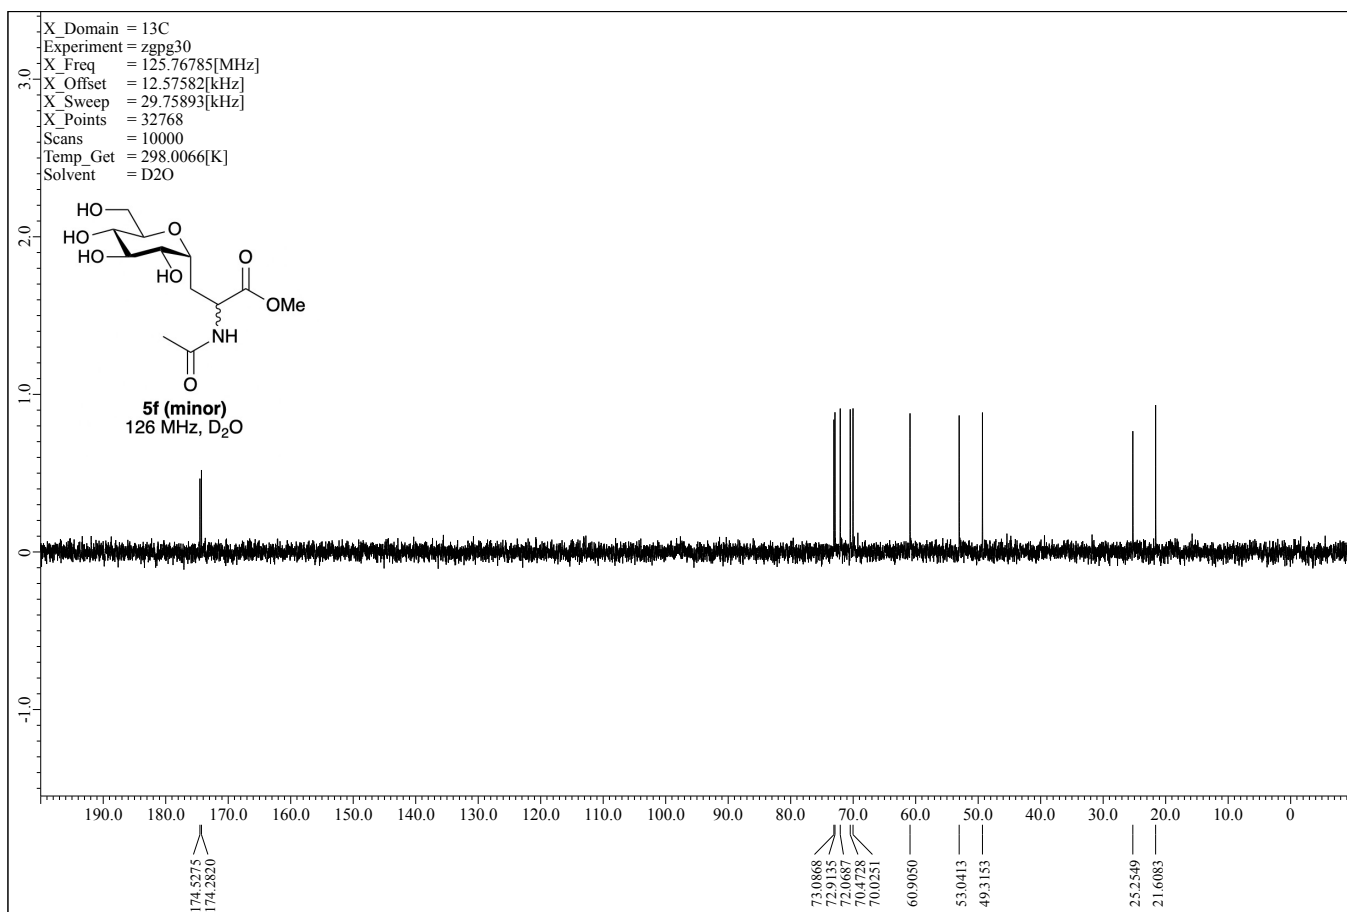

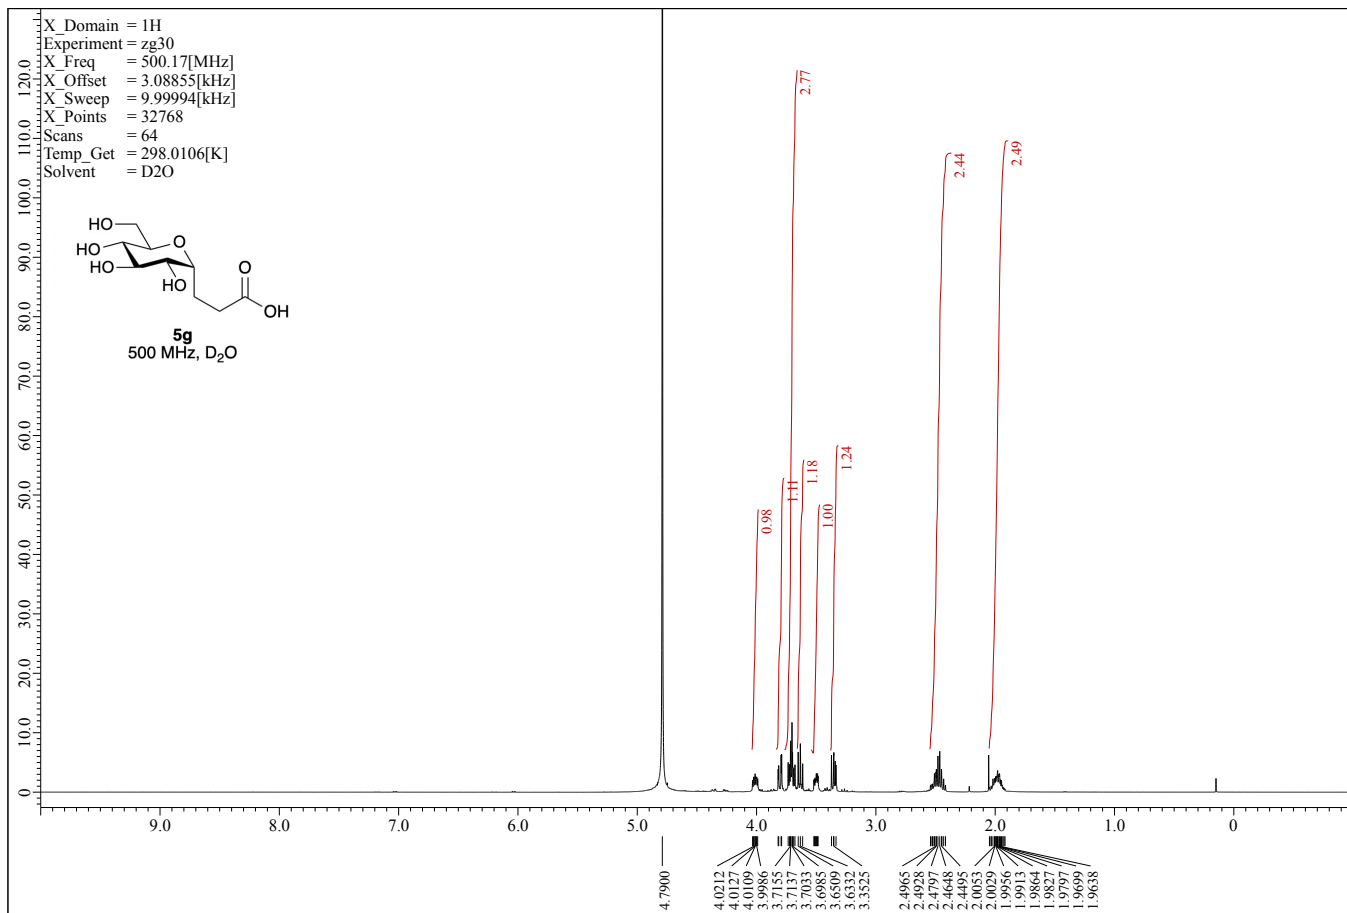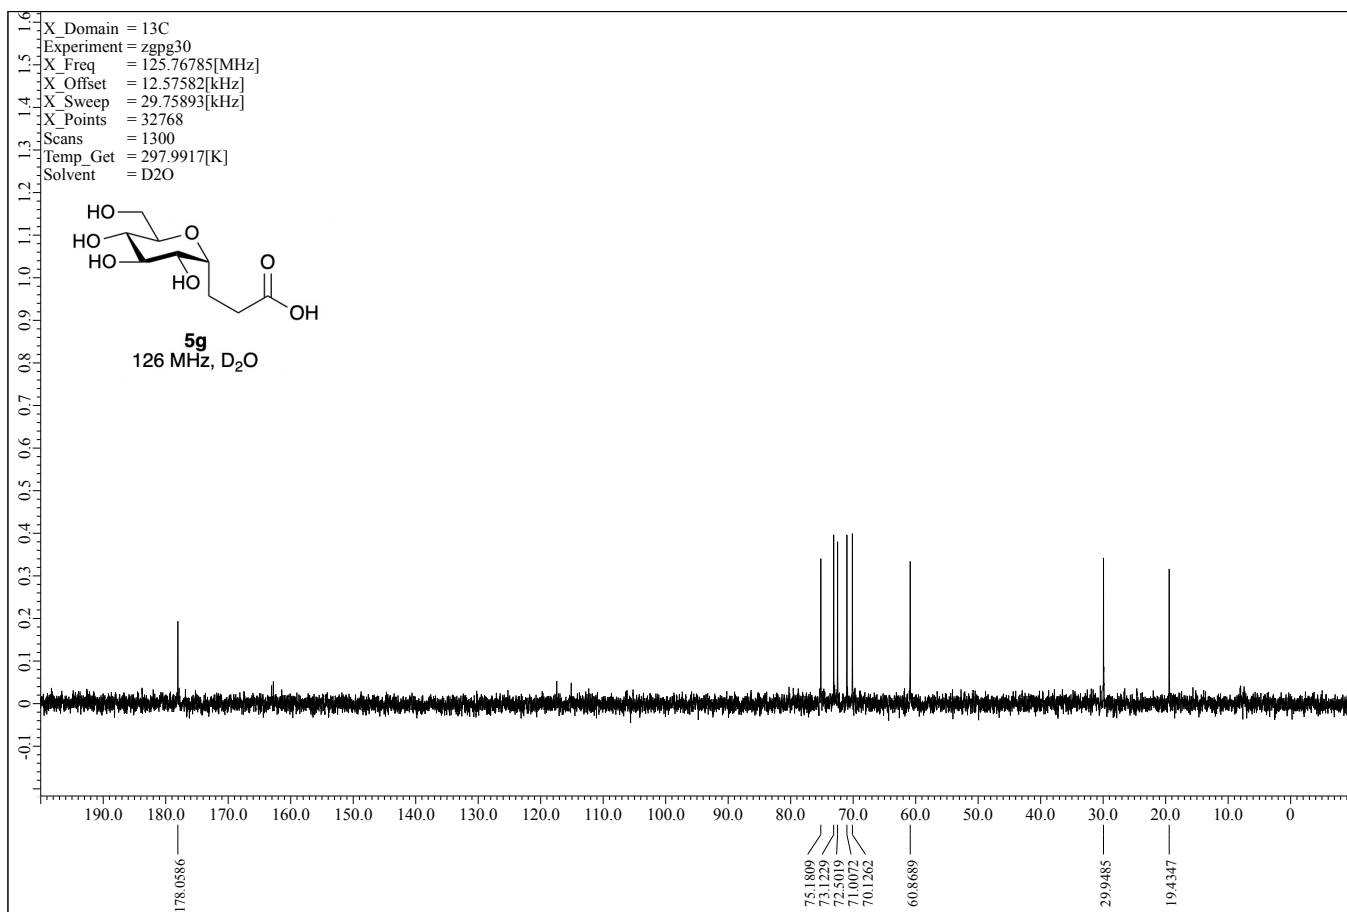

Supplement: d3cc02361c1.pdf [file d3cc02361c1.pdf]
